# Supplementary material for: Cross life cycle opportunities for increasing the post-consumer recycled content of aluminum automotive body sheet in the United States
Source: Research Square preprint supplement (doi:10.21203/rs.3.rs-8217840/v1), 2025-12-17
Supplement: Supplementary file 1 [file 4a4c0a7fa56a0e29afaf2943.xlsx]

## Sheet: Figure 1
(a) Annual ABS ingot demand [kt]
BAU
Alloy	2025	2026	2027	2028	2029	2030	2031	2032	2033	2034	2035	2036	2037	2038	2039	2040	2041	2042	2043	2044	2045	2046	2047	2048	2049	2050
High-Mg (AA5182, Non-Ford)	91.101	93.1428	95.1845	97.2266	99.2685	101.31	103.352	105.394	107.436	109.478	111.52	113.562	115.604	117.646	119.688	121.729	123.771	125.813	127.855	129.897	131.939	133.981	136.023	138.065	140.107	142.149
Low-Mg (AA5754, Ford)	85.0233	86.833	88.6427	90.4522	92.2619	94.0716	95.8811	97.6908	99.5005	101.31	103.12	104.929	106.739	108.549	110.358	112.168	113.978	115.787	117.597	119.406	121.216	123.026	124.836	126.645	128.455	130.264
High-Mg (AA5182, Ford)	53.4357	54.573	55.7104	56.8477	57.985	59.1224	60.2596	61.397	62.5344	63.6717	64.809	65.9464	67.0837	68.2209	69.3583	70.4956	71.633	72.7703	73.9076	75.0449	76.1822	77.3196	78.457	79.5942	80.7316	81.8689
Low-Cu (AA6016, Non-Ford)	53.9338	55.2168	56.4998	57.7833	59.0665	60.3495	61.633	62.916	64.1992	65.4825	66.7657	68.0487	69.3319	70.6154	71.8984	73.1817	74.4649	75.7481	77.0312	78.3146	79.5979	80.8809	82.1639	83.4473	84.7306	86.0138
Low-Cu (AA6005C, Non-Ford)	53.9338	55.2168	56.4998	57.7833	59.0665	60.3495	61.633	62.916	64.1992	65.4825	66.7657	68.0487	69.3319	70.6154	71.8984	73.1817	74.4649	75.7481	77.0312	78.3146	79.5979	80.8809	82.1639	83.4473	84.7306	86.0138
Low-Cu (AA6005C, Ford)	234.178	239.162	244.147	249.131	254.115	259.099	264.083	269.068	274.052	279.036	284.02	289.005	293.989	298.973	303.958	308.942	313.926	318.91	323.895	328.879	333.863	338.847	343.832	348.816	353.8	358.784
High-Cu (AA6111, Ford)	261.469	267.034	272.599	278.164	283.729	289.295	294.859	300.425	305.99	311.555	317.12	322.685	328.25	333.815	339.38	344.946	350.511	356.076	361.641	367.206	372.771	378.336	383.902	389.466	395.031	400.597
Low Demand Growth Rate
Alloy	2025	2026	2027	2028	2029	2030	2031	2032	2033	2034	2035	2036	2037	2038	2039	2040	2041	2042	2043	2044	2045	2046	2047	2048	2049	2050
High-Mg (AA5182, Non-Ford)	91.101	91.101	91.101	91.101	91.101	91.101	91.101	91.101	91.101	91.101	91.101	91.101	91.101	91.101	91.101	91.101	91.101	91.101	91.101	91.101	91.101	91.101	91.101	91.101	91.101	91.101
Low-Mg (AA5754, Ford)	85.0233	85.0233	85.0233	85.0233	85.0233	85.0233	85.0233	85.0233	85.0233	85.0233	85.0233	85.0233	85.0233	85.0233	85.0233	85.0233	85.0233	85.0233	85.0233	85.0233	85.0233	85.0233	85.0233	85.0233	85.0233	85.0233
High-Mg (AA5182, Ford)	53.4357	53.4357	53.4357	53.4357	53.4357	53.4357	53.4357	53.4357	53.4357	53.4357	53.4357	53.4357	53.4357	53.4357	53.4357	53.4357	53.4357	53.4357	53.4357	53.4357	53.4357	53.4357	53.4357	53.4357	53.4357	53.4357
Low-Cu (AA6016, Non-Ford)	53.9338	53.9338	53.9338	53.9338	53.9338	53.9338	53.9338	53.9338	53.9338	53.9338	53.9338	53.9338	53.9338	53.9338	53.9338	53.9338	53.9338	53.9338	53.9338	53.9338	53.9338	53.9338	53.9338	53.9338	53.9338	53.9338
Low-Cu (AA6005C, Non-Ford)	53.9338	53.9338	53.9338	53.9338	53.9338	53.9338	53.9338	53.9338	53.9338	53.9338	53.9338	53.9338	53.9338	53.9338	53.9338	53.9338	53.9338	53.9338	53.9338	53.9338	53.9338	53.9338	53.9338	53.9338	53.9338	53.9338
Low-Cu (AA6005C, Ford)	234.178	234.178	234.178	234.178	234.178	234.178	234.178	234.178	234.178	234.178	234.178	234.178	234.178	234.178	234.178	234.178	234.178	234.178	234.178	234.178	234.178	234.178	234.178	234.178	234.178	234.178
High-Cu (AA6111, Ford)	261.469	261.469	261.469	261.469	261.469	261.469	261.469	261.469	261.469	261.469	261.469	261.469	261.469	261.469	261.469	261.469	261.469	261.469	261.469	261.469	261.469	261.469	261.469	261.469	261.469	261.469
High Demand Growth Rate
Alloy	2025	2026	2027	2028	2029	2030	2031	2032	2033	2034	2035	2036	2037	2038	2039	2040	2041	2042	2043	2044	2045	2046	2047	2048	2049	2050
High-Mg (AA5182, Non-Ford)	91.101	93.3748	95.7056	98.0946	100.543	103.052	105.625	108.261	110.963	113.732	116.571	119.48	122.461	125.517	128.65	131.86	135.151	138.523	141.979	145.522	149.153	152.875	156.689	160.599	164.605	168.712
Low-Mg (AA5754, Ford)	85.0233	87.064	89.1535	91.2931	93.4842	95.7278	98.0253	100.378	102.787	105.254	107.78	110.367	113.015	115.728	118.505	121.349	124.262	127.244	130.298	133.425	136.627	139.906	143.264	146.702	150.223	153.829
High-Mg (AA5182, Ford)	53.4357	54.7182	56.0314	57.3762	58.7532	60.1633	61.6072	63.0858	64.5998	66.1502	67.7378	69.3635	71.0283	72.733	74.4785	76.266	78.0964	79.9707	81.89	83.8554	85.8679	87.9287	90.039	92.1999	94.4127	96.6787
Low-Cu (AA6016, Non-Ford)	53.9338	55.3431	56.7893	58.2732	59.7956	61.3575	62.9598	64.6042	66.2909	68.0216	69.7971	71.6189	73.4877	75.4053	77.3727	79.391	81.4618	83.5859	85.7655	88.0016	90.2956	92.6493	95.0638	97.5411	100.083	102.69
Low-Cu (AA6005C, Non-Ford)	53.9338	55.3431	56.7893	58.2732	59.7956	61.3575	62.9598	64.6042	66.2909	68.0216	69.7971	71.6189	73.4877	75.4053	77.3727	79.391	81.4618	83.5859	85.7655	88.0016	90.2956	92.6493	95.0638	97.5411	100.083	102.69
Low-Cu (AA6005C, Ford)	234.178	239.798	245.553	251.447	257.481	263.661	269.989	276.469	283.104	289.898	296.856	303.98	311.276	318.747	326.396	334.23	342.251	350.466	358.877	367.49	376.31	385.341	394.589	404.059	413.757	423.687
High-Cu (AA6111, Ford)	261.469	267.744	274.17	280.75	287.488	294.388	301.453	308.688	316.097	323.683	331.451	339.406	347.552	355.893	364.434	373.181	382.137	391.309	400.7	410.317	420.164	430.248	440.574	451.148	461.975	473.063
(b) Annual ELV ABS scrap arising [kt]
BAU
Alloy	2025	2026	2027	2028	2029	2030	2031	2032	2033	2034	2035	2036	2037	2038	2039	2040	2041	2042	2043	2044	2045	2046	2047	2048	2049	2050
High-Mg (AA5182, Non-Ford)	32.2273	33.9896	35.9376	37.9475	39.8986	41.6914	43.2576	44.5623	45.6007	46.3911	46.9686	47.3786	47.6701	47.8914	48.0855	48.2874	48.5234	48.8104	49.1573	49.5666	50.0361	50.6564	51.3546	52.0796	52.8265	53.5907
Low-Mg (AA5754, Ford)	2.61088	3.51224	4.58197	5.81467	7.1971	8.70932	10.3266	12.0219	13.7678	15.5386	17.3116	19.0675	20.7914	22.4718	24.1009	25.674	27.1887	28.6445	30.0426	31.3851	32.6749	33.8572	34.9756	36.0605	37.1145	38.1402
High-Mg (AA5182, Ford)	1.63438	2.19945	2.87056	3.64445	4.51288	5.46337	6.48037	7.54676	8.64525	9.75958	10.8753	11.9804	13.0653	14.1227	15.1478	16.1375	17.0904	18.0061	18.8854	19.7296	20.5406	21.2827	21.9843	22.6649	23.3262	23.9698
Low-Cu (AA6016, Non-Ford)	40.1934	41.7799	43.4851	45.1535	46.6389	47.8266	48.6456	49.0695	49.1106	48.811	48.2319	47.4458	46.5276	45.5481	44.5694	43.641	42.7989	42.0661	41.4535	40.9632	40.5903	40.4704	40.4924	40.578	40.7183	40.9054
Low-Cu (AA6005C, Non-Ford)	40.1934	41.7799	43.4851	45.1535	46.6389	47.8266	48.6456	49.0695	49.1106	48.811	48.2319	47.4458	46.5276	45.5481	44.5694	43.641	42.7989	42.0661	41.4535	40.9632	40.5903	40.4704	40.4924	40.578	40.7183	40.9054
Low-Cu (AA6005C, Ford)	7.58288	10.1502	13.1686	16.6146	20.4462	24.6063	29.0284	33.6419	38.3772	43.1696	47.9624	52.7081	57.3692	61.9171	66.3322	70.602	74.7202	78.6854	82.4999	86.1688	89.6992	93.0084	96.1682	99.2293	102.2	105.087
High-Cu (AA6111, Ford)	7.91707	10.6647	13.9338	17.7102	21.9546	26.6065	31.5895	36.8189	42.209	47.679	53.157	58.5829	63.9091	69.0998	74.1305	78.9862	83.6595	88.1493	92.4592	96.5959	100.569	104.189	107.606	110.922	114.144	117.28
Low Demand Growth Rate
Alloy	2025	2026	2027	2028	2029	2030	2031	2032	2033	2034	2035	2036	2037	2038	2039	2040	2041	2042	2043	2044	2045	2046	2047	2048	2049	2050
High-Mg (AA5182, Non-Ford)	32.2273	33.9896	35.9388	37.9509	39.9054	41.702	43.2697	44.5687	45.5862	46.3309	46.8266	47.1063	47.208	47.1704	47.0295	46.8163	46.5561	46.2679	45.9652	45.6568	45.348	45.1377	44.9616	44.7767	44.5854	44.3901
Low-Mg (AA5754, Ford)	2.61088	3.51224	4.58126	5.81236	7.19144	8.69728	10.3033	11.9798	13.6961	15.4227	17.1328	18.8028	20.4136	21.95	23.4012	24.7599	26.0224	27.1874	28.256	29.2311	30.1167	30.8595	31.5052	32.0861	32.607	33.0727
High-Mg (AA5182, Ford)	1.63438	2.19945	2.87012	3.643	4.50934	5.45583	6.46574	7.52034	8.60029	9.68694	10.7632	11.8144	12.8282	13.7952	14.7084	15.5634	16.3576	17.0904	17.7625	18.3756	18.9324	19.3982	19.8024	20.1661	20.4921	20.7836
Low-Cu (AA6016, Non-Ford)	40.1934	41.78	43.4872	45.1598	46.6526	47.8506	48.681	49.1126	49.1505	48.8262	48.1895	47.2999	46.2206	45.0128	43.7313	42.4222	41.1216	39.8555	38.6411	37.4881	36.4009	35.5251	34.759	34.0337	33.3486	32.7031
Low-Cu (AA6005C, Non-Ford)	40.1934	41.78	43.4872	45.1598	46.6526	47.8506	48.681	49.1126	49.1505	48.8262	48.1895	47.2999	46.2206	45.0128	43.7313	42.4222	41.1216	39.8555	38.6411	37.4881	36.4009	35.5251	34.759	34.0337	33.3486	32.7031
Low-Cu (AA6005C, Ford)	7.58288	10.1502	13.1665	16.6078	20.4296	24.5712	28.9606	33.52	38.1709	42.8385	47.4547	51.9608	56.3081	60.4585	64.384	68.066	71.4941	74.6647	77.58	80.2468	82.6748	84.7857	86.6559	88.3418	89.8569	91.2146
High-Cu (AA6111, Ford)	7.91707	10.6647	13.9317	17.7031	21.9375	26.57	31.5187	36.6908	41.9908	47.326	52.6116	57.7743	62.7532	67.5014	71.9845	76.1803	80.0767	83.6703	86.9646	89.9687	92.6953	94.9611	96.9205	98.6822	100.261	101.672
High Demand Growth Rate
Alloy	2025	2026	2027	2028	2029	2030	2031	2032	2033	2034	2035	2036	2037	2038	2039	2040	2041	2042	2043	2044	2045	2046	2047	2048	2049	2050
High-Mg (AA5182, Non-Ford)	32.2275	33.9897	35.9375	37.947	39.8975	41.6896	43.2551	44.5601	45.6005	46.3964	46.9849	47.4138	47.735	47.9995	48.2532	48.534	48.8705	49.2821	49.7797	50.3674	51.0445	51.9029	52.8706	53.8976	54.9795	56.1125
Low-Mg (AA5754, Ford)	2.61088	3.51224	4.58206	5.81499	7.19791	8.71109	10.3302	12.0285	13.7794	15.5578	17.342	19.1139	20.8597	22.5692	24.2359	25.8564	27.4296	28.9563	30.4389	31.8806	33.2856	34.6	35.8685	37.1224	38.3653	39.6007
High-Mg (AA5182, Ford)	1.63438	2.19945	2.87061	3.64464	4.51338	5.46448	6.48259	7.55089	8.65248	9.7716	10.8944	12.0095	13.1081	14.1839	15.2326	16.2521	17.2417	18.2019	19.1343	20.0409	20.9243	21.7495	22.5455	23.3324	24.1125	24.8879
Low-Cu (AA6016, Non-Ford)	40.1935	41.7801	43.485	45.1528	46.6371	47.8231	48.6399	49.0615	49.1014	48.8028	48.2292	47.4553	46.5587	45.6132	44.6835	43.8218	43.0667	42.4429	41.9632	41.631	41.4424	41.534	41.7949	42.1476	42.5832	43.0942
Low-Cu (AA6005C, Non-Ford)	40.1935	41.7801	43.485	45.1528	46.6371	47.8231	48.6399	49.0615	49.1014	48.8028	48.2292	47.4553	46.5587	45.6132	44.6835	43.8218	43.0667	42.4429	41.9632	41.631	41.4424	41.534	41.7949	42.1476	42.5832	43.0942
Low-Cu (AA6005C, Ford)	7.58288	10.1502	13.1689	16.6156	20.4485	24.6115	29.0388	33.661	38.4104	43.2245	48.0491	52.8397	57.5619	62.1906	66.7098	71.1104	75.3897	79.5498	83.5963	87.5375	91.3835	95.0546	98.6254	102.149	105.637	109.098
High-Cu (AA6111, Ford)	7.91707	10.6647	13.9341	17.7111	21.9571	26.6119	31.6002	36.8389	42.2441	47.7374	53.2498	58.7246	64.1179	69.3978	74.5439	79.5452	84.3985	89.1064	93.6763	98.1186	102.446	106.473	110.353	114.189	117.993	121.775
(c) Annual ABS production scrap arising [kt]
BAU
Alloy	2025	2026	2027	2028	2029	2030	2031	2032	2033	2034	2035	2036	2037	2038	2039	2040	2041	2042	2043	2044	2045	2046	2047	2048	2049	2050
High-Mg (AA5182, Non-Ford)	46.4251	47.4656	48.506	49.5467	50.5872	51.6278	52.6684	53.7089	54.7494	55.79	56.8306	57.8711	58.9116	59.9523	60.9928	62.0333	63.0739	64.1145	65.155	66.1956	67.2362	68.2767	69.3172	70.3578	71.3984	72.4389
Low-Mg (AA5754, Ford)	43.3279	44.2501	45.1723	46.0945	47.0167	47.9389	48.861	49.7833	50.7054	51.6276	52.5498	53.472	54.3942	55.3164	56.2386	57.1608	58.083	59.0052	59.9274	60.8495	61.7717	62.6939	63.6162	64.5383	65.4605	66.3827
High-Mg (AA5182, Ford)	27.2308	27.8104	28.39	28.9696	29.5492	30.1288	30.7083	31.2879	31.8675	32.4471	33.0267	33.6063	34.1858	34.7654	35.345	35.9246	36.5042	37.0837	37.6633	38.2429	38.8225	39.4021	39.9817	40.5612	41.1408	41.7204
Low-Cu (AA6016, Non-Ford)	27.4847	28.1385	28.7923	29.4464	30.1003	30.7541	31.4082	32.062	32.7159	33.3699	34.0238	34.6776	35.3316	35.9856	36.6394	37.2934	37.9473	38.6013	39.2551	39.9091	40.5631	41.2169	41.8707	42.5248	43.1787	43.8326
Low-Cu (AA6005C, Non-Ford)	27.4847	28.1385	28.7923	29.4464	30.1003	30.7541	31.4082	32.062	32.7159	33.3699	34.0238	34.6776	35.3316	35.9856	36.6394	37.2934	37.9473	38.6013	39.2551	39.9091	40.5631	41.2169	41.8707	42.5248	43.1787	43.8326
Low-Cu (AA6005C, Ford)	119.337	121.877	124.417	126.957	129.497	132.037	134.577	137.117	139.657	142.197	144.737	147.277	149.817	152.357	154.897	157.437	159.977	162.517	165.057	167.597	170.137	172.677	175.217	177.757	180.296	182.836
High-Cu (AA6111, Ford)	133.244	136.08	138.917	141.752	144.588	147.424	150.26	153.096	155.932	158.768	161.604	164.44	167.276	170.112	172.948	175.784	178.62	181.456	184.292	187.128	189.964	192.8	195.636	198.472	201.308	204.144
Low Demand Growth Rate
Alloy	2025	2026	2027	2028	2029	2030	2031	2032	2033	2034	2035	2036	2037	2038	2039	2040	2041	2042	2043	2044	2045	2046	2047	2048	2049	2050
High-Mg (AA5182, Non-Ford)	46.4251	46.4251	46.4251	46.4251	46.4251	46.4251	46.4251	46.4251	46.4251	46.4251	46.4251	46.4251	46.4251	46.4251	46.4251	46.4251	46.4251	46.4251	46.4251	46.4251	46.4251	46.4251	46.4251	46.4251	46.4251	46.4251
Low-Mg (AA5754, Ford)	43.3279	43.3279	43.3279	43.3279	43.3279	43.3279	43.3279	43.3279	43.3279	43.3279	43.3279	43.3279	43.3279	43.3279	43.3279	43.3279	43.3279	43.3279	43.3279	43.3279	43.3279	43.3279	43.3279	43.3279	43.3279	43.3279
High-Mg (AA5182, Ford)	27.2308	27.2308	27.2308	27.2308	27.2308	27.2308	27.2308	27.2308	27.2308	27.2308	27.2308	27.2308	27.2308	27.2308	27.2308	27.2308	27.2308	27.2308	27.2308	27.2308	27.2308	27.2308	27.2308	27.2308	27.2308	27.2308
Low-Cu (AA6016, Non-Ford)	27.4847	27.4847	27.4847	27.4847	27.4847	27.4847	27.4847	27.4847	27.4847	27.4847	27.4847	27.4847	27.4847	27.4847	27.4847	27.4847	27.4847	27.4847	27.4847	27.4847	27.4847	27.4847	27.4847	27.4847	27.4847	27.4847
Low-Cu (AA6005C, Non-Ford)	27.4847	27.4847	27.4847	27.4847	27.4847	27.4847	27.4847	27.4847	27.4847	27.4847	27.4847	27.4847	27.4847	27.4847	27.4847	27.4847	27.4847	27.4847	27.4847	27.4847	27.4847	27.4847	27.4847	27.4847	27.4847	27.4847
Low-Cu (AA6005C, Ford)	119.337	119.337	119.337	119.337	119.337	119.337	119.337	119.337	119.337	119.337	119.337	119.337	119.337	119.337	119.337	119.337	119.337	119.337	119.337	119.337	119.337	119.337	119.337	119.337	119.337	119.337
High-Cu (AA6111, Ford)	133.244	133.244	133.244	133.244	133.244	133.244	133.244	133.244	133.244	133.244	133.244	133.244	133.244	133.244	133.244	133.244	133.244	133.244	133.244	133.244	133.244	133.244	133.244	133.244	133.244	133.244
High Demand Growth Rate
Alloy	2025	2026	2027	2028	2029	2030	2031	2032	2033	2034	2035	2036	2037	2038	2039	2040	2041	2042	2043	2044	2045	2046	2047	2048	2049	2050
High-Mg (AA5182, Non-Ford)	46.4251	47.5838	48.7716	49.989	51.2367	52.5156	53.8262	55.1697	56.5466	57.9579	59.4043	60.8869	62.4063	63.9637	65.56	67.196	68.8728	70.5913	72.3528	74.1581	76.0085	77.905	79.8487	81.841	83.8829	85.9756
Low-Mg (AA5754, Ford)	43.3279	44.3678	45.4326	46.523	47.6395	48.7829	49.9537	51.1526	52.3802	53.6374	54.9247	56.2428	57.5927	58.9749	60.3903	61.8396	63.3238	64.8436	66.3998	67.9934	69.6253	71.2963	73.0074	74.7595	76.5538	78.3911
High-Mg (AA5182, Ford)	27.2308	27.8844	28.5536	29.2389	29.9406	30.6592	31.395	32.1485	32.9201	33.7102	34.5192	35.3477	36.196	37.0647	37.9542	38.8652	39.7979	40.7531	41.7312	42.7327	43.7583	44.8085	45.8839	46.9851	48.1127	49.2675
Low-Cu (AA6016, Non-Ford)	27.4847	28.2028	28.9398	29.696	30.4718	31.2678	32.0843	32.9223	33.7818	34.6638	35.5686	36.497	37.4493	38.4265	39.4291	40.4576	41.5129	42.5954	43.7061	44.8456	46.0146	47.2141	48.4445	49.707	51.0021	52.3307
Low-Cu (AA6005C, Non-Ford)	27.4847	28.2028	28.9398	29.696	30.4718	31.2678	32.0843	32.9223	33.7818	34.6638	35.5686	36.497	37.4493	38.4265	39.4291	40.4576	41.5129	42.5954	43.7061	44.8456	46.0146	47.2141	48.4445	49.707	51.0021	52.3307
Low-Cu (AA6005C, Ford)	119.337	122.201	125.134	128.137	131.213	134.362	137.586	140.888	144.27	147.732	151.278	154.908	158.626	162.433	166.332	170.324	174.411	178.597	182.884	187.273	191.767	196.37	201.083	205.909	210.85	215.911
High-Cu (AA6111, Ford)	133.244	136.442	139.717	143.07	146.504	150.02	153.621	157.307	161.083	164.949	168.908	172.961	177.112	181.363	185.716	190.173	194.737	199.411	204.197	209.097	214.116	219.254	224.517	229.905	235.423	241.073

## Sheet: Figures 2, 4, & 5
Temporal PCRR, PCRC, and emissions values for U.S. ABS system
PCRR
	2025	2026	2027	2028	2029	2030	2031	2032	2033	2034	2035	2036	2037	2038	2039	2040	2041	2042	2043	2044	2045	2046	2047	2048	2049	2050
① BAU recycling with base case ABS demand growth	0.0777009	0.0730018	0.0683342	0.0639989	0.0601584	0.0568624	0.0540923	0.0517926	0.0498939	0.0483258	0.0470224	0.0459258	0.0449863	0.0441638	0.0434272	0.0427527	0.0421289	0.0415192	0.0409418	0.0403933	0.039872	0.0393774	0.0389087	0.0384654	0.0380467	0.0376517
② Low ABS demand growth	0.0777009	0.0715061	0.0655922	0.060226	0.0555264	0.0515024	0.0481032	0.0452504	0.0428606	0.0408556	0.0391667	0.0377356	0.0365138	0.0354624	0.0345502	0.0337524	0.0330608	0.0324263	0.0318639	0.0313646	0.0309212	0.0305276	0.0301785	0.0298691	0.0295951	0.0293524
③ High ABS demand growth	0.0777009	0.0731998	0.0687345	0.064602	0.0609641	0.0578713	0.055307	0.0532167	0.0515322	0.0501828	0.0491021	0.0482304	0.0475165	0.0469179	0.0464011	0.0459407	0.0455224	0.0451089	0.0447183	0.0443471	0.0439937	0.0436576	0.0433387	0.0430367	0.0427515	0.0424824
④ Alternative (Greene and Leard) vehicle lifespans with base case ABS demand growth	0.0777009	0.100621	0.0936782	0.0866636	0.0802711	0.0755942	0.0721014	0.0682032	0.0652893	0.0624895	0.061402	0.059919	0.0586117	0.0585556	0.0578147	0.0570803	0.0572425	0.0563356	0.0550965	0.0542236	0.0532688	0.0528282	0.0518071	0.0515592	0.0506445	0.0497542
⑤ Shifting from P1020 to P0610	0.0777009	0.0773577	0.0724461	0.0678835	0.0638426	0.0603764	0.0574661	0.0550538	0.0530666	0.0514303	0.0500755	0.0489408	0.0479736	0.0471313	0.0463808	0.0456964	0.0450954	0.0444795	0.0438975	0.0433453	0.0428213	0.0423247	0.041855	0.0414113	0.0409932	0.0405995
⑥ Shifting from P1020 to P0000	0.0777009	0.092714	0.0869032	0.0815035	0.0767225	0.0726254	0.0691913	0.0663528	0.064024	0.0621168	0.0605489	0.0592466	0.0581471	0.0571991	0.0563625	0.0556055	0.0550091	0.0543339	0.0536981	0.0530967	0.0525275	0.0519896	0.0514823	0.0510047	0.0505565	0.0501362
⑦ Using High Residual Content (HRC) alloys	0.0777009	0.0730018	0.0683342	0.0639989	0.0601584	0.190599	0.182099	0.175136	0.169488	0.164923	0.161229	0.158209	0.155698	0.153561	0.151691	0.150001	0.148959	0.147411	0.145942	0.144544	0.143212	0.141947	0.140748	0.139618	0.138556	0.137561
⑧ Removing furnace charge constraint (FCC)	0.0777009	0.0814805	0.0763743	0.0716296	0.0674289	0.0638291	0.0608117	0.0583168	0.0562686	0.0545896	0.0532072	0.0520565	0.0510823	0.0502396	0.0494931	0.0488154	0.0482586	0.0476502	0.047076	0.0465319	0.0460161	0.0455279	0.0450667	0.044632	0.0442232	0.0438394
⑨ Separating manufacturing scrap by alloy	0.0777009	0.0939163	0.0882628	0.0830215	0.0784	0.0744626	0.0711894	0.0685132	0.0663484	0.064606	0.063203	0.0620632	0.0611224	0.0603278	0.0596375	0.0590174	0.0586807	0.0581145	0.0575787	0.0570691	0.0565844	0.0561244	0.0556896	0.0552804	0.0548968	0.0545384
⑩ Shifting demand for 5xxx to 6xxx series	0.0777009	0.0730018	0.0683342	0.0639989	0.0601584	0.0912777	0.0871016	0.0836655	0.0808601	0.0785734	0.0767006	0.0751478	0.0738356	0.072699	0.0716874	0.0707614	0.0694045	0.0681482	0.0669754	0.0658747	0.0648382	0.0638606	0.0629376	0.0620657	0.0612413	0.0604611
⑪ Separating Twitch scrap by alloy series (LIBS)	0.0777009	0.653809	0.653809	0.653809	0.653808	0.638627	0.60558	0.578058	0.555315	0.536574	0.521109	0.508269	0.497497	0.488329	0.48039	0.473391	0.467117	0.461416	0.456183	0.451349	0.44687	0.442715	0.438862	0.435294	0.43199	0.428934
⑫ Removing castings from Twitch scrap	0.0777009	0.22013	0.207343	0.195639	0.185391	0.176663	0.169364	0.163311	0.15829	0.154093	0.150529	0.147435	0.144672	0.14214	0.139764	0.137494	0.135301	0.133171	0.131101	0.1291	0.127173	0.125328	0.12357	0.121904	0.120328	0.118844
⑬ Isolating shredding of aluminum-sheet-intensive vehicles	0.0777009	0.0730018	0.0683342	0.0639989	0.0601584	0.0880501	0.0834003	0.079528	0.0763269	0.0736878	0.0715083	0.0696974	0.0681769	0.0668815	0.0657594	0.0647698	0.0638827	0.0630765	0.0623367	0.0616534	0.0610405	0.0604768	0.0599553	0.059471	0.0590219	0.0586056
⑦+⑩	0.0777009	0.0730018	0.0683342	0.0639989	0.0601584	0.193868	0.184958	0.177625	0.171635	0.166749	0.162744	0.159421	0.15661	0.154173	0.152004	0.150017	0.147118	0.144434	0.141928	0.139576	0.137362	0.135273	0.133302	0.131439	0.129677	0.128011
⑦+⑪	0.0777009	0.653809	0.653809	0.653809	0.653808	0.9025	0.9025	0.9025	0.9025	0.9025	0.9025	0.9025	0.9025	0.9025	0.9025	0.9025	0.9025	0.9025	0.9025	0.9025	0.9025	0.9025	0.9025	0.9025	0.9025	0.9025
⑩+⑪	0.0777009	0.653809	0.653809	0.653809	0.653808	0.9025	0.9025	0.9025	0.878765	0.855436	0.836183	0.820199	0.806788	0.795373	0.785489	0.776566	0.768439	0.761053	0.752792	0.744805	0.737403	0.730537	0.724171	0.718273	0.712813	0.707761
⑨+⑪	0.0777009	0.9025	0.9025	0.9025	0.870751	0.830753	0.795102	0.765412	0.740877	0.716261	0.695621	0.678485	0.664109	0.651874	0.641279	0.63194	0.623568	0.615959	0.608976	0.602526	0.596549	0.591004	0.585864	0.581102	0.576694	0.572615
⑦+⑩+⑪	0.0777009	0.653809	0.653809	0.653809	0.653808	0.9025	0.9025	0.9025	0.9025	0.9025	0.9025	0.9025	0.9025	0.9025	0.9025	0.9025	0.9025	0.9025	0.9025	0.9025	0.9025	0.9025	0.9025	0.9025	0.9025	0.9025
⑤+⑦+⑧+⑨+⑩+⑪	0.0777009	0.9025	0.9025	0.9025	0.888025	0.9025	0.9025	0.9025	0.9025	0.9025	0.9025	0.9025	0.9025	0.9025	0.9025	0.9025	0.9025	0.9025	0.9025	0.9025	0.9025	0.9025	0.9025	0.9025	0.9025	0.9025
PCRC
	2025	2026	2027	2028	2029	2030	2031	2032	2033	2034	2035	2036	2037	2038	2039	2040	2041	2042	2043	2044	2045	2046	2047	2048	2049	2050
① BAU recycling with base case ABS demand growth	0.0117279	0.0117389	0.0117592	0.0117871	0.0118207	0.0118573	0.0118946	0.0119306	0.0119634	0.0119916	0.012014	0.0120297	0.0120383	0.0120396	0.012034	0.0120219	0.0120051	0.0119772	0.0119458	0.0119116	0.0118754	0.0118378	0.0117992	0.0117601	0.0117208	0.0116814
② Low ABS demand growth	0.0117279	0.0117483	0.011778	0.0118153	0.0118584	0.0119046	0.0119517	0.0119976	0.0120404	0.0120788	0.0121114	0.0121375	0.0121565	0.0121684	0.0121733	0.0121716	0.012168	0.0121505	0.0121294	0.0121055	0.0120794	0.0120517	0.0120231	0.0119937	0.011964	0.0119341
③ High ABS demand growth	0.0117279	0.0117404	0.0117617	0.0117904	0.0118244	0.011861	0.0118982	0.0119335	0.0119654	0.0119923	0.012013	0.0120267	0.0120328	0.0120314	0.0120226	0.0120069	0.0119858	0.0119536	0.0119174	0.0118781	0.0118365	0.0117931	0.0117484	0.0117028	0.0116567	0.0116103
④ Alternative (Greene and Leard) vehicle lifespans with base case ABS demand growth	0.0117279	0.0117389	0.0117592	0.0117871	0.0118207	0.0118573	0.0118946	0.0119306	0.0119634	0.0119916	0.012014	0.0120297	0.0120383	0.0120396	0.012034	0.0120219	0.0120051	0.0119772	0.0119458	0.0119116	0.0118754	0.0118378	0.0117992	0.0117601	0.0117208	0.0116814
⑤ Shifting from P1020 to P0610	0.0117279	0.0124394	0.0124668	0.0125026	0.0125446	0.01259	0.0126365	0.0126818	0.0127241	0.0127619	0.012794	0.0128194	0.0128377	0.0128486	0.0128525	0.0128496	0.0128505	0.0128312	0.0128081	0.0127821	0.0127538	0.0127238	0.0126927	0.0126608	0.0126284	0.012596
⑥ Shifting from P1020 to P0000	0.0117279	0.0149087	0.0149546	0.0150111	0.0150754	0.0151442	0.0152148	0.0152846	0.0153514	0.0154137	0.0154699	0.0155189	0.0155601	0.0155932	0.0156185	0.015636	0.0156755	0.0156739	0.0156677	0.0156577	0.0156446	0.0156293	0.0156122	0.0155938	0.0155745	0.0155547
⑦ Using High Residual Content (HRC) alloys	0.0117279	0.0117389	0.0117592	0.0117871	0.0118207	0.0397448	0.0400426	0.0403431	0.0406391	0.0409241	0.0411931	0.0414409	0.0416647	0.0418627	0.0420347	0.0421796	0.0424479	0.0425242	0.0425822	0.0426246	0.0426539	0.0426725	0.0426825	0.0426858	0.0426839	0.0426781
⑧ Removing furnace charge constraint (FCC)	0.0117279	0.0131023	0.0131428	0.0131925	0.0132493	0.01331	0.0133722	0.0134334	0.0134919	0.0135459	0.0135941	0.0136356	0.0136696	0.013696	0.013715	0.0137267	0.0137519	0.0137458	0.0137356	0.0137218	0.0137053	0.0136868	0.0136667	0.0136454	0.0136235	0.0136011
⑨ Separating manufacturing scrap by alloy	0.0117279	0.015102	0.0151886	0.0152907	0.015405	0.0155274	0.0156542	0.0157822	0.0159088	0.0160314	0.016148	0.0162567	0.0163563	0.0164461	0.016526	0.0165954	0.0167218	0.0167645	0.0168	0.0168291	0.0168529	0.0168723	0.0168881	0.016901	0.0169116	0.0169205
⑩ Shifting demand for 5xxx to 6xxx series	0.0117279	0.0117389	0.0117592	0.0117871	0.0118207	0.0190337	0.0191532	0.0192726	0.0193884	0.0194972	0.0195965	0.0196841	0.0197583	0.0198187	0.0198652	0.0198978	0.0197777	0.019659	0.0195417	0.0194258	0.0193112	0.019198	0.0190861	0.0189755	0.0188661	0.018758
⑪ Separating Twitch scrap by alloy series (LIBS)	0.0117279	0.105135	0.11251	0.120417	0.128469	0.13317	0.133164	0.133157	0.133151	0.133146	0.13314	0.133135	0.13313	0.133125	0.13312	0.133115	0.133111	0.133107	0.133102	0.133098	0.133094	0.13309	0.133087	0.133083	0.13308	0.133076
⑫ Removing castings from Twitch scrap	0.0117279	0.0353976	0.0356804	0.0360322	0.0364281	0.0368387	0.0372423	0.0376191	0.0379542	0.0382368	0.0384594	0.0386188	0.0387142	0.0387492	0.0387299	0.0386627	0.0385558	0.0384163	0.0382519	0.0380703	0.0378768	0.0376765	0.0374732	0.0372699	0.0370685	0.0368712
⑬ Isolating shredding of aluminum-sheet-intensive vehicles	0.0117279	0.0117389	0.0117592	0.0117871	0.0118207	0.0183607	0.0183393	0.0183195	0.0183014	0.0182849	0.0182699	0.0182564	0.0182441	0.0182328	0.0182225	0.018213	0.0182042	0.0181959	0.0181882	0.018181	0.0181801	0.0181808	0.0181817	0.0181822	0.0181824	0.0181823
⑦+⑩	0.0117279	0.0117389	0.0117592	0.0117871	0.0118207	0.0404264	0.0406713	0.0409164	0.041154	0.0413771	0.0415802	0.0417584	0.0419087	0.0420297	0.0421215	0.0421841	0.0419231	0.0416654	0.0414109	0.0411596	0.0409114	0.0406663	0.0404242	0.040185	0.0399487	0.0397152
⑦+⑪	0.0117279	0.105135	0.11251	0.120417	0.128469	0.188194	0.198455	0.207894	0.216398	0.223947	0.230583	0.236399	0.241508	0.246033	0.25009	0.253779	0.257179	0.260348	0.263326	0.266138	0.268798	0.271313	0.273687	0.275923	0.278026	0.28
⑩+⑪	0.0117279	0.105135	0.11251	0.120417	0.128469	0.188194	0.198455	0.207894	0.210707	0.212268	0.21364	0.214841	0.215896	0.216829	0.217665	0.218367	0.218976	0.219544	0.219645	0.219635	0.219626	0.219617	0.219608	0.219599	0.219591	0.219582
⑨+⑪	0.0117279	0.145125	0.155306	0.16622	0.171096	0.173233	0.174838	0.176315	0.177645	0.177733	0.177727	0.177721	0.177715	0.177709	0.177704	0.177698	0.177693	0.177688	0.177683	0.177679	0.177674	0.17767	0.177666	0.177661	0.177657	0.177653
⑦+⑩+⑪	0.0117279	0.105135	0.11251	0.120417	0.128469	0.188194	0.198455	0.207894	0.216398	0.223947	0.230583	0.236399	0.241508	0.246033	0.25009	0.253779	0.257179	0.260348	0.263326	0.266138	0.268798	0.271313	0.273687	0.275923	0.278026	0.28
⑤+⑦+⑧+⑨+⑩+⑪	0.0117279	0.145125	0.155306	0.16622	0.174491	0.188194	0.198455	0.207894	0.216398	0.223947	0.230583	0.236399	0.241508	0.246033	0.25009	0.253779	0.257179	0.260348	0.263326	0.266138	0.268798	0.271313	0.273687	0.275923	0.278026	0.28
Emissions [frozen decarbonization pathway] [ktCO2e]
	2025	2026	2027	2028	2029	2030	2031	2032	2033	2034	2035	2036	2037	2038	2039	2040	2041	2042	2043	2044	2045	2046	2047	2048	2049	2050
① Baseline	4427.89	4523.98	4619.99	4715.95	4811.85	4907.72	5003.57	5099.42	5195.29	5291.18	5387.12	5483.11	5579.15	5675.26	5771.43	5867.67	5963.95	6060.35	6156.78	6253.26	6349.76	6446.3	6542.85	6639.42	6736	6832.6
⑦ Using High Residual Content (HRC) alloys	4427.89	4523.98	4619.99	4715.95	4811.85	4722.65	4812.86	4902.95	4992.99	5083.03	5173.12	5263.31	5353.64	5444.13	5534.8	5625.67	5715.33	5806.76	5898.34	5990.06	6081.89	6173.83	6265.86	6357.95	6450.09	6542.28
⑩ Shifting demand for 5xxx to 6xxx series	4427.89	4523.98	4619.99	4715.95	4811.85	4884.3	4979.09	5073.85	5168.6	5263.37	5358.19	5453.09	5548.07	5643.16	5738.36	5833.67	5930.42	6027.19	6123.99	6220.81	6317.65	6414.51	6511.39	6608.3	6705.22	6802.16
⑪ Separating Twitch scrap by alloy series (LIBS)	4427.89	3921.78	3997	4071.2	4144.83	4222.49	4306.24	4389.99	4473.74	4557.49	4641.24	4724.98	4808.73	4892.48	4976.22	5059.97	5143.72	5227.47	5311.21	5394.96	5478.71	5562.45	5646.2	5729.95	5813.69	5897.44
⑦+⑩	4427.89	4523.98	4619.99	4715.95	4811.85	4717.33	4807.85	4898.3	4988.73	5079.21	5169.8	5260.54	5351.47	5442.62	5534	5625.63	5720.31	5815.04	5909.81	6004.63	6099.49	6194.4	6289.36	6384.35	6479.39	6574.47
⑦+⑪	4427.89	3921.78	3997	4071.2	4144.83	3447.2	3446.51	3448.82	3456.21	3468.27	3484.75	3505.35	3529.56	3557.09	3586.99	3618.64	3651.62	3686.3	3721.7	3757.68	3794.21	3831.28	3868.9	3907.44	3947.4	3987.9
⑩+⑪	4427.89	3921.78	3997	4071.2	4144.83	3592.62	3602.96	3621.83	3674.71	3730.26	3786.9	3844.55	3903.09	3962.36	4022.21	4083.01	4144.44	4206.07	4271.87	4338.7	4405.53	4472.35	4539.18	4606	4672.83	4739.65
Emissions [moderate decarbonization pathway] [ktCO2e]
	2025	2026	2027	2028	2029	2030	2031	2032	2033	2034	2035	2036	2037	2038	2039	2040	2041	2042	2043	2044	2045	2046	2047	2048	2049	2050
① Baseline	4583.32	4590.1	4592.84	4591.55	4586.26	4577	4579.98	4579.66	4576.04	4569.14	4558.99	4547.97	4533.79	4516.46	4495.96	4472.3	4445.19	4415.21	4382.04	4345.67	4306.09	4262.56	4215.78	4165.77	4112.51	4056
⑦ Using High Residual Content (HRC) alloys	4583.32	4590.1	4592.84	4591.55	4586.26	4370.7	4371.31	4368.71	4362.98	4354.17	4342.35	4329.97	4314.74	4296.69	4275.82	4252.17	4223.74	4194.63	4162.67	4127.82	4090.06	4048.62	4004.22	3956.83	3906.44	3853.03
⑩ Shifting demand for 5xxx to 6xxx series	4583.32	4590.1	4592.84	4591.55	4586.26	4405.57	4404.78	4400.68	4393.3	4382.67	4368.82	4354.17	4336.42	4315.6	4291.67	4264.68	4237.43	4206.98	4173.33	4136.46	4096.39	4052.37	4005.1	3954.61	3900.87	3843.9
⑪ Separating Twitch scrap by alloy series (LIBS)	4583.32	4009.15	4008.08	4003.37	3995.35	3986.7	3994.47	3999.46	4001.67	4001.1	3997.74	3994	3987.56	3978.43	3966.59	3952.07	3934.81	3914.86	3892.21	3866.86	3838.82	3807.32	3773.1	3736.18	3696.52	3654.14
⑦+⑩	4583.32	4590.1	4592.84	4591.55	4586.26	4252.92	4251.05	4245.98	4237.76	4226.49	4212.21	4197.37	4179.69	4159.2	4135.89	4109.78	4086.88	4060.92	4031.89	3999.79	3964.61	3925.61	3883.49	3838.27	3789.93	3738.48
⑦+⑪	4583.32	4009.15	4008.08	4003.37	3995.35	3205.16	3152.27	3102.8	3058.53	3018.58	2982.38	2951.83	2923.95	2898.37	2874.14	2850.72	2827.4	2805.05	2782.54	2759.75	2736.62	2712.35	2687.65	2662.67	2637.58	2611.87
⑩+⑪	4583.32	4009.15	4008.08	4003.37	3995.35	3226.29	3179.23	3140.49	3131.87	3123.57	3114.3	3106.37	3097.3	3086.98	3075.27	3062.48	3048.29	3032.43	3016.27	2998.5	2978.73	2956.2	2931.66	2905.09	2876.5	2845.89
Emissions [aggressive decarbonization pathway] [ktCO2e]
	2025	2026	2027	2028	2029	2030	2031	2032	2033	2034	2035	2036	2037	2038	2039	2040	2041	2042	2043	2044	2045	2046	2047	2048	2049	2050
① Baseline	4266.61	4099.97	3908.56	3692.84	3457.87	3131.56	2799.38	2696.31	2588.44	2473.09	2346.52	2242.01	2130.96	2013.57	1892.6	1770.09	1658.13	1541.99	1423.8	1298.69	1169.41	1038.4	903.343	760.314	619.557	466.043
⑦ Using High Residual Content (HRC) alloys	4266.61	4099.97	3908.56	3692.84	3457.87	3031.96	2714.77	2613.93	2508.48	2395.94	2272.79	2171.41	2063.88	1950.41	1833.56	1715.27	1606.53	1494.24	1379.97	1259.13	1134.3	1007.76	877.328	739.317	603.335	455.088
⑩ Shifting demand for 5xxx to 6xxx series	4266.61	4099.97	3908.56	3692.84	3457.87	3129.02	2800.14	2697.06	2589.18	2473.9	2347.52	2243.1	2132.2	2015.04	1894.31	1772.04	1660.46	1544.62	1426.64	1301.75	1172.63	1041.71	906.69	763.712	622.87	469.308
⑪ Separating Twitch scrap by alloy series (LIBS)	4266.61	3564.89	3395.38	3205.74	3000.74	2720.57	2441.81	2351.82	2257.49	2156.61	2046.07	1956.42	1861.08	1760.25	1656.19	1550.62	1453.54	1352.75	1250.04	1141.38	1029.04	915.06	797.506	673.137	550.441	416.444
⑦+⑩	4266.61	4099.97	3908.56	3692.84	3457.87	3028.77	2712.2	2611.67	2506.53	2394.3	2271.45	2170.37	2063.12	1949.92	1833.32	1715.26	1607.78	1496.13	1382.34	1261.82	1137.16	1010.66	880.138	741.89	605.578	456.849
⑦+⑪	4266.61	3564.89	3395.38	3205.74	3000.74	2266.14	2013.08	1906.61	1802.26	1697.9	1591.02	1507.33	1422.92	1337.57	1252.17	1167.41	1089.12	1009.63	929.69	846.804	762.299	677.321	590.685	500.516	411.691	315.313
⑩+⑪	4266.61	3564.89	3395.38	3205.74	3000.74	2353.46	2093.43	1990.76	1902.67	1811.15	1713.03	1635.47	1554.17	1469.18	1382.08	1294.17	1212.68	1128.41	1043.5	954.117	861.704	767.75	670.84	568.59	467.24	356.448

## Sheet: Figure 3
Temporal PCRR and PCRC values for Ford ABS case study
PCRR
	2025	2026	2027	2028	2029	2030	2031	2032	2033	2034	2035	2036	2037	2038	2039	2040	2041	2042	2043	2044	2045	2046	2047	2048	2049	2050
① [Ford ABS] Baseline	0.813418	0.617972	0.483947	0.389454	0.321202	0.270845	0.232985	0.204035	0.18156	0.16387	0.149772	0.138409	0.129154	0.121546	0.115237	0.109963	0.105521	0.101755	0.0985399	0.095779	0.0933941	0.0914699	0.0898362	0.0883869	0.0870958	0.0859405
② [Ford ABS] Using High Residual Content (HRC) alloys	0.813418	0.617972	0.483947	0.389454	0.321202	0.784309	0.674707	0.590898	0.525829	0.474612	0.433793	0.40089	0.374092	0.35206	0.333789	0.318515	0.305651	0.294743	0.285432	0.277435	0.270527	0.264952	0.260217	0.256017	0.252276	0.248928
③ [Ford ABS] Shifting demand for 5xxx to 6xxx series	0.813418	0.617972	0.483947	0.389454	0.321202	0.333694	0.287045	0.251376	0.223684	0.201889	0.184519	0.170518	0.159117	0.149743	0.14197	0.135472	0.13011	0.125569	0.121701	0.118385	0.115529	0.113227	0.111278	0.109558	0.108032	0.106674
④ [Ford ABS] Reducing steel rivet use	0.813418	0.617972	0.483947	0.389454	0.321202	0.270845	0.232985	0.204035	0.18156	0.16387	0.149772	0.138409	0.129154	0.121546	0.115237	0.109963	0.105604	0.101913	0.0987679	0.0960717	0.0937479	0.0918748	0.0902887	0.0888875	0.0876447	0.0865382
⑤ [Ford ABS] Removing castings from ELV scrap	0.813418	0.9025	0.8864	0.713841	0.589163	0.497134	0.427907	0.374943	0.333801	0.301399	0.275562	0.254724	0.237745	0.223778	0.212191	0.2025	0.194335	0.187409	0.181495	0.176414	0.172024	0.168466	0.165439	0.162754	0.160364	0.158225
⑥ [Ford ABS] Processing Zorba into Twitch by size	0.813418	0.769525	0.630786	0.532948	0.462258	0.410079	0.364753	0.320283	0.285138	0.25746	0.235389	0.217589	0.203085	0.191155	0.181257	0.172978	0.166004	0.160087	0.155036	0.150696	0.146945	0.143906	0.14132	0.139027	0.136985	0.135158
⑦ [Ford ABS] Separating Twitch scrap by alloy series (LIBS)	0.813418	0.9025	0.9025	0.9025	0.9025	0.9025	0.9025	0.9025	0.893812	0.817432	0.752935	0.698977	0.652384	0.614059	0.582262	0.55567	0.533265	0.514259	0.498031	0.484089	0.472042	0.462279	0.453973	0.446607	0.440046	0.434178
⑧ [Ford ABS] Enhanced vehicle disassembly before shredding (VD1)	0.813418	0.596741	0.596741	0.596741	0.596741	0.567293	0.521949	0.487258	0.460309	0.439086	0.422162	0.408514	0.397392	0.388244	0.380654	0.374306	0.368958	0.364422	0.360548	0.35722	0.354344	0.352014	0.350031	0.348273	0.346707	0.345306
⑨ [Ford ABS] Enhanced vehicle disassembly before shredding (VD2)	0.813418	0.9025	0.9025	0.9025	0.9025	0.9025	0.9025	0.9025	0.9025	0.9025	0.9025	0.9025	0.900831	0.87658	0.841657	0.812451	0.787844	0.766969	0.749146	0.733833	0.720602	0.709879	0.700757	0.692666	0.685461	0.679016
PCRC
	2025	2026	2027	2028	2029	2030	2031	2032	2033	2034	2035	2036	2037	2038	2039	2040	2041	2042	2043	2044	2045	2046	2047	2048	2049	2050
① [Ford ABS] Baseline	0.0240623	0.0240473	0.0240306	0.0240133	0.023996	0.0239798	0.0239649	0.0239517	0.0239403	0.0239306	0.0239226	0.0239161	0.0239109	0.0239067	0.0239035	0.0239011	0.0238993	0.023898	0.0238971	0.0238965	0.0238962	0.0238981	0.0239007	0.023903	0.023905	0.0239067
② [Ford ABS] Using High Residual Content (HRC) alloys	0.0240623	0.0240473	0.0240306	0.0240133	0.023996	0.0694401	0.0694006	0.0693655	0.0693352	0.0693096	0.0692883	0.069271	0.0692571	0.0692462	0.0692377	0.0692313	0.0692265	0.069223	0.0692206	0.069219	0.0692181	0.0692233	0.0692303	0.0692363	0.0692415	0.069246
③ [Ford ABS] Shifting demand for 5xxx to 6xxx series	0.0240623	0.0240473	0.0240306	0.0240133	0.023996	0.0295442	0.0295255	0.029509	0.0294947	0.0294826	0.0294726	0.0294644	0.0294579	0.0294527	0.0294487	0.0294457	0.0294684	0.0294911	0.0295139	0.0295367	0.0295596	0.0295825	0.0296054	0.0296283	0.0296513	0.0296744
④ [Ford ABS] Reducing steel rivet use	0.0240623	0.0240473	0.0240306	0.0240133	0.023996	0.0239798	0.0239649	0.0239517	0.0239403	0.0239306	0.0239226	0.0239161	0.0239109	0.0239067	0.0239035	0.0239011	0.0239182	0.0239353	0.0239524	0.0239695	0.0239867	0.0240039	0.0240211	0.0240384	0.0240556	0.0240729
⑤ [Ford ABS] Removing castings from ELV scrap	0.0240623	0.0351192	0.0440146	0.0440146	0.0440146	0.0440146	0.0440146	0.0440146	0.0440146	0.0440146	0.0440146	0.0440146	0.0440146	0.0440146	0.0440146	0.0440146	0.0440146	0.0440146	0.0440146	0.0440146	0.0440146	0.0440146	0.0440146	0.0440146	0.0440146	0.0440146
⑥ [Ford ABS] Processing Zorba into Twitch by size	0.0240623	0.0299447	0.031322	0.032861	0.0345339	0.036307	0.0375186	0.037598	0.037598	0.037598	0.037598	0.037598	0.037598	0.037598	0.037598	0.037598	0.037598	0.037598	0.037598	0.037598	0.037598	0.037598	0.037598	0.037598	0.037598	0.037598
⑦ [Ford ABS] Separating Twitch scrap by alloy series (LIBS)	0.0240623	0.0351192	0.0448141	0.0556471	0.0674231	0.0799043	0.0928314	0.105944	0.117857	0.119373	0.120264	0.120778	0.120778	0.120778	0.120778	0.120778	0.120778	0.120778	0.120778	0.120778	0.120778	0.120778	0.120778	0.120778	0.120778	0.120778
⑧ [Ford ABS] Enhanced vehicle disassembly before shredding (VD1)	0.0240623	0.0232211	0.0296315	0.0367943	0.0445808	0.0502262	0.0536878	0.0571992	0.0606958	0.0641216	0.0674306	0.0705884	0.0735707	0.0763631	0.0789589	0.0813579	0.0835648	0.0855878	0.0874372	0.0891251	0.0906639	0.0919698	0.0931251	0.0941855	0.0951599	0.0960563
⑨ [Ford ABS] Enhanced vehicle disassembly before shredding (VD2)	0.0240623	0.0351192	0.0448141	0.0556471	0.0674231	0.0799043	0.0928314	0.105944	0.119003	0.131796	0.144153	0.155946	0.166774	0.172413	0.174585	0.176591	0.178438	0.18013	0.181677	0.183089	0.184376	0.185468	0.186435	0.187322	0.188137	0.188887
