# Supplementary material for: Cross life cycle opportunities for increasing the post-consumer recycled content of aluminum automotive body sheet in the United States
Source: Research Square preprint supplement (doi:10.21203/rs.3.rs-8217840/v1), 2025-12-17
Supplement: Supplementary file 2 [file d972074028960d46b681c241.xlsx]

## Sheet: 0. ReadMe
Supporting Information (S2) for:
	Cross life cycle opportunities for increasing the post-consumer recycled content of automotive aluminum body sheet in the United States
This spreadsheet contains:
	LP model input data
	- 'ABS DMFA'
	- 'Compositions'
	- 'Emissions intensities'
	LP model outputs (results)
	- 'Input to alloy flows'
	- 'Binding constraints ranked'

## Sheet: 1. ABS DMFA
Domestic ABS DMFA data
	See the following for DMFA derivations:
	Zhu, Y., Deng, S., Cooper, D. R., Tsai, A., Heidari, M., Liao, J. (2025). Dynamic Material Flow Analysis of Aluminum in the United States: Historical and Projected Data from 1967 to 2050 [Data set], University of Michigan - Deep Blue Data. https://doi.org/10.7302/ztkj-y672
	Deng, S., Zhu, Y., Tsai, A., Cooper, D.R. (2025). Decarbonizing the U.S. Aluminum Ecosystem using a Dynamic Material Flow Simulation Framework. https://doi.org/10.2139/ssrn.5404956
LDV lifespan model based on Liao
Ingot Demand (kt)
BAU
Alloy	2020	2021	2022	2023	2024	2025	2026	2027	2028	2029	2030	2031	2032	2033	2034	2035	2036	2037	2038	2039	2040	2041	2042	2043	2044	2045	2046	2047	2048	2049	2050
High-Mg (AA5182, Non-Ford)	80.8913	82.9334	84.9751	87.017	89.0591	91.101	93.1428	95.1845	97.2266	99.2685	101.31	103.352	105.394	107.436	109.478	111.52	113.562	115.604	117.646	119.688	121.729	123.771	125.813	127.855	129.897	131.939	133.981	136.023	138.065	140.107	142.149
Low-Mg (AA5754, Ford)	75.9752	77.7847	79.5945	81.4041	83.2137	85.0233	86.833	88.6427	90.4522	92.2619	94.0716	95.8811	97.6908	99.5005	101.31	103.12	104.929	106.739	108.549	110.358	112.168	113.978	115.787	117.597	119.406	121.216	123.026	124.836	126.645	128.455	130.264
High-Mg (AA5182, Ford)	47.7491	48.8863	50.0238	51.1611	52.2984	53.4357	54.573	55.7104	56.8477	57.985	59.1224	60.2596	61.397	62.5344	63.6717	64.809	65.9464	67.0837	68.2209	69.3583	70.4956	71.633	72.7703	73.9076	75.0449	76.1822	77.3196	78.457	79.5942	80.7316	81.8689
Low-Cu (AA6016, Non-Ford)	47.5176	48.8011	50.0839	51.3671	52.6506	53.9338	55.2168	56.4998	57.7833	59.0665	60.3495	61.633	62.916	64.1992	65.4825	66.7657	68.0487	69.3319	70.6154	71.8984	73.1817	74.4649	75.7481	77.0312	78.3146	79.5979	80.8809	82.1639	83.4473	84.7306	86.0138
Low-Cu (AA6005C, Non-Ford)	47.5176	48.8011	50.0839	51.3671	52.6506	53.9338	55.2168	56.4998	57.7833	59.0665	60.3495	61.633	62.916	64.1992	65.4825	66.7657	68.0487	69.3319	70.6154	71.8984	73.1817	74.4649	75.7481	77.0312	78.3146	79.5979	80.8809	82.1639	83.4473	84.7306	86.0138
Low-Cu (AA6005C, Ford)	209.257	214.241	219.225	224.21	229.194	234.178	239.162	244.147	249.131	254.115	259.099	264.083	269.068	274.052	279.036	284.02	289.005	293.989	298.973	303.958	308.942	313.926	318.91	323.895	328.879	333.863	338.847	343.832	348.816	353.8	358.784
High-Cu (AA6111, Ford)	233.643	239.208	244.774	250.339	255.904	261.469	267.034	272.599	278.164	283.729	289.295	294.859	300.425	305.99	311.555	317.12	322.685	328.25	333.815	339.38	344.946	350.511	356.076	361.641	367.206	372.771	378.336	383.902	389.466	395.031	400.597
Low Demand Growth Rate
Alloy	2020	2021	2022	2023	2024	2025	2026	2027	2028	2029	2030	2031	2032	2033	2034	2035	2036	2037	2038	2039	2040	2041	2042	2043	2044	2045	2046	2047	2048	2049	2050
High-Mg (AA5182, Non-Ford)	80.8913	82.9334	84.9751	87.017	89.0591	91.101	91.101	91.101	91.101	91.101	91.101	91.101	91.101	91.101	91.101	91.101	91.101	91.101	91.101	91.101	91.101	91.101	91.101	91.101	91.101	91.101	91.101	91.101	91.101	91.101	91.101
Low-Mg (AA5754, Ford)	75.9752	77.7847	79.5945	81.4041	83.2137	85.0233	85.0233	85.0233	85.0233	85.0233	85.0233	85.0233	85.0233	85.0233	85.0233	85.0233	85.0233	85.0233	85.0233	85.0233	85.0233	85.0233	85.0233	85.0233	85.0233	85.0233	85.0233	85.0233	85.0233	85.0233	85.0233
High-Mg (AA5182, Ford)	47.7491	48.8863	50.0238	51.1611	52.2984	53.4357	53.4357	53.4357	53.4357	53.4357	53.4357	53.4357	53.4357	53.4357	53.4357	53.4357	53.4357	53.4357	53.4357	53.4357	53.4357	53.4357	53.4357	53.4357	53.4357	53.4357	53.4357	53.4357	53.4357	53.4357	53.4357
Low-Cu (AA6016, Non-Ford)	47.5176	48.8011	50.0839	51.3671	52.6506	53.9338	53.9338	53.9338	53.9338	53.9338	53.9338	53.9338	53.9338	53.9338	53.9338	53.9338	53.9338	53.9338	53.9338	53.9338	53.9338	53.9338	53.9338	53.9338	53.9338	53.9338	53.9338	53.9338	53.9338	53.9338	53.9338
Low-Cu (AA6005C, Non-Ford)	47.5176	48.8011	50.0839	51.3671	52.6506	53.9338	53.9338	53.9338	53.9338	53.9338	53.9338	53.9338	53.9338	53.9338	53.9338	53.9338	53.9338	53.9338	53.9338	53.9338	53.9338	53.9338	53.9338	53.9338	53.9338	53.9338	53.9338	53.9338	53.9338	53.9338	53.9338
Low-Cu (AA6005C, Ford)	209.257	214.241	219.225	224.21	229.194	234.178	234.178	234.178	234.178	234.178	234.178	234.178	234.178	234.178	234.178	234.178	234.178	234.178	234.178	234.178	234.178	234.178	234.178	234.178	234.178	234.178	234.178	234.178	234.178	234.178	234.178
High-Cu (AA6111, Ford)	233.643	239.208	244.774	250.339	255.904	261.469	261.469	261.469	261.469	261.469	261.469	261.469	261.469	261.469	261.469	261.469	261.469	261.469	261.469	261.469	261.469	261.469	261.469	261.469	261.469	261.469	261.469	261.469	261.469	261.469	261.469
High Demand Growth Rate
Alloy	2020	2021	2022	2023	2024	2025	2026	2027	2028	2029	2030	2031	2032	2033	2034	2035	2036	2037	2038	2039	2040	2041	2042	2043	2044	2045	2046	2047	2048	2049	2050
High-Mg (AA5182, Non-Ford)	80.8913	82.9334	84.9751	87.017	89.0591	91.101	93.3748	95.7056	98.0946	100.543	103.052	105.625	108.261	110.963	113.732	116.571	119.48	122.461	125.517	128.65	131.86	135.151	138.523	141.979	145.522	149.153	152.875	156.689	160.599	164.605	168.712
Low-Mg (AA5754, Ford)	75.9752	77.7847	79.5945	81.4041	83.2137	85.0233	87.064	89.1535	91.2931	93.4842	95.7278	98.0253	100.378	102.787	105.254	107.78	110.367	113.015	115.728	118.505	121.349	124.262	127.244	130.298	133.425	136.627	139.906	143.264	146.702	150.223	153.829
High-Mg (AA5182, Ford)	47.7491	48.8863	50.0238	51.1611	52.2984	53.4357	54.7182	56.0314	57.3762	58.7532	60.1633	61.6072	63.0858	64.5998	66.1502	67.7378	69.3635	71.0283	72.733	74.4785	76.266	78.0964	79.9707	81.89	83.8554	85.8679	87.9287	90.039	92.1999	94.4127	96.6787
Low-Cu (AA6016, Non-Ford)	47.5176	48.8011	50.0839	51.3671	52.6506	53.9338	55.3431	56.7893	58.2732	59.7956	61.3575	62.9598	64.6042	66.2909	68.0216	69.7971	71.6189	73.4877	75.4053	77.3727	79.391	81.4618	83.5859	85.7655	88.0016	90.2956	92.6493	95.0638	97.5411	100.083	102.69
Low-Cu (AA6005C, Non-Ford)	47.5176	48.8011	50.0839	51.3671	52.6506	53.9338	55.3431	56.7893	58.2732	59.7956	61.3575	62.9598	64.6042	66.2909	68.0216	69.7971	71.6189	73.4877	75.4053	77.3727	79.391	81.4618	83.5859	85.7655	88.0016	90.2956	92.6493	95.0638	97.5411	100.083	102.69
Low-Cu (AA6005C, Ford)	209.257	214.241	219.225	224.21	229.194	234.178	239.798	245.553	251.447	257.481	263.661	269.989	276.469	283.104	289.898	296.856	303.98	311.276	318.747	326.396	334.23	342.251	350.466	358.877	367.49	376.31	385.341	394.589	404.059	413.757	423.687
High-Cu (AA6111, Ford)	233.643	239.208	244.774	250.339	255.904	261.469	267.744	274.17	280.75	287.488	294.388	301.453	308.688	316.097	323.683	331.451	339.406	347.552	355.893	364.434	373.181	382.137	391.309	400.7	410.317	420.164	430.248	440.574	451.148	461.975	473.063
EOL Scrap (kt)
BAU
Alloy	2020	2021	2022	2023	2024	2025	2026	2027	2028	2029	2030	2031	2032	2033	2034	2035	2036	2037	2038	2039	2040	2041	2042	2043	2044	2045	2046	2047	2048	2049	2050
High-Mg (AA5182, Non-Ford)	28.3028	28.4784	28.8959	29.6412	30.7559	32.2273	33.9896	35.9376	37.9475	39.8986	41.6914	43.2576	44.5623	45.6007	46.3911	46.9686	47.3786	47.6701	47.8914	48.0855	48.2874	48.5234	48.8104	49.1573	49.5666	50.0361	50.6564	51.3546	52.0796	52.8265	53.5907
Low-Mg (AA5754, Ford)	0.319477	0.538471	0.856633	1.29573	1.87531	2.61088	3.51224	4.58197	5.81467	7.1971	8.70932	10.3266	12.0219	13.7678	15.5386	17.3116	19.0675	20.7914	22.4718	24.1009	25.674	27.1887	28.6445	30.0426	31.3851	32.6749	33.8572	34.9756	36.0605	37.1145	38.1402
High-Mg (AA5182, Ford)	0.199808	0.336792	0.535846	0.810653	1.17354	1.63438	2.19945	2.87056	3.64445	4.51288	5.46337	6.48037	7.54676	8.64525	9.75958	10.8753	11.9804	13.0653	14.1227	15.1478	16.1375	17.0904	18.0061	18.8854	19.7296	20.5406	21.2827	21.9843	22.6649	23.3262	23.9698
Low-Cu (AA6016, Non-Ford)	36.9353	36.9817	37.2635	37.8767	38.8622	40.1934	41.7799	43.4851	45.1535	46.6389	47.8266	48.6456	49.0695	49.1106	48.811	48.2319	47.4458	46.5276	45.5481	44.5694	43.641	42.7989	42.0661	41.4535	40.9632	40.5903	40.4704	40.4924	40.578	40.7183	40.9054
Low-Cu (AA6005C, Non-Ford)	36.9353	36.9817	37.2635	37.8767	38.8622	40.1934	41.7799	43.4851	45.1535	46.6389	47.8266	48.6456	49.0695	49.1106	48.811	48.2319	47.4458	46.5276	45.5481	44.5694	43.641	42.7989	42.0661	41.4535	40.9632	40.5903	40.4704	40.4924	40.578	40.7183	40.9054
Low-Cu (AA6005C, Ford)	0.938643	1.5809	2.51161	3.79075	5.46906	7.58288	10.1502	13.1686	16.6146	20.4462	24.6063	29.0284	33.6419	38.3772	43.1696	47.9624	52.7081	57.3692	61.9171	66.3322	70.602	74.7202	78.6854	82.4999	86.1688	89.6992	93.0084	96.1682	99.2293	102.2	105.087
High-Cu (AA6111, Ford)	0.965677	1.62796	2.59083	3.92123	5.68012	7.91707	10.6647	13.9338	17.7102	21.9546	26.6065	31.5895	36.8189	42.209	47.679	53.157	58.5829	63.9091	69.0998	74.1305	78.9862	83.6595	88.1493	92.4592	96.5959	100.569	104.189	107.606	110.922	114.144	117.28
Low Demand Growth Rate
Alloy	2020	2021	2022	2023	2024	2025	2026	2027	2028	2029	2030	2031	2032	2033	2034	2035	2036	2037	2038	2039	2040	2041	2042	2043	2044	2045	2046	2047	2048	2049	2050
High-Mg (AA5182, Non-Ford)	28.3028	28.4784	28.8959	29.6412	30.7559	32.2273	33.9896	35.9388	37.9509	39.9054	41.702	43.2697	44.5687	45.5862	46.3309	46.8266	47.1063	47.208	47.1704	47.0295	46.8163	46.5561	46.2679	45.9652	45.6568	45.348	45.1377	44.9616	44.7767	44.5854	44.3901
Low-Mg (AA5754, Ford)	0.319477	0.538471	0.856633	1.29573	1.87531	2.61088	3.51224	4.58126	5.81236	7.19144	8.69728	10.3033	11.9798	13.6961	15.4227	17.1328	18.8028	20.4136	21.95	23.4012	24.7599	26.0224	27.1874	28.256	29.2311	30.1167	30.8595	31.5052	32.0861	32.607	33.0727
High-Mg (AA5182, Ford)	0.199808	0.336792	0.535846	0.810653	1.17354	1.63438	2.19945	2.87012	3.643	4.50934	5.45583	6.46574	7.52034	8.60029	9.68694	10.7632	11.8144	12.8282	13.7952	14.7084	15.5634	16.3576	17.0904	17.7625	18.3756	18.9324	19.3982	19.8024	20.1661	20.4921	20.7836
Low-Cu (AA6016, Non-Ford)	36.9353	36.9817	37.2635	37.8767	38.8622	40.1934	41.78	43.4872	45.1598	46.6526	47.8506	48.681	49.1126	49.1505	48.8262	48.1895	47.2999	46.2206	45.0128	43.7313	42.4222	41.1216	39.8555	38.6411	37.4881	36.4009	35.5251	34.759	34.0337	33.3486	32.7031
Low-Cu (AA6005C, Non-Ford)	36.9353	36.9817	37.2635	37.8767	38.8622	40.1934	41.78	43.4872	45.1598	46.6526	47.8506	48.681	49.1126	49.1505	48.8262	48.1895	47.2999	46.2206	45.0128	43.7313	42.4222	41.1216	39.8555	38.6411	37.4881	36.4009	35.5251	34.759	34.0337	33.3486	32.7031
Low-Cu (AA6005C, Ford)	0.938643	1.5809	2.51161	3.79075	5.46906	7.58288	10.1502	13.1665	16.6078	20.4296	24.5712	28.9606	33.52	38.1709	42.8385	47.4547	51.9608	56.3081	60.4585	64.384	68.066	71.4941	74.6647	77.58	80.2468	82.6748	84.7857	86.6559	88.3418	89.8569	91.2146
High-Cu (AA6111, Ford)	0.965677	1.62796	2.59083	3.92123	5.68012	7.91707	10.6647	13.9317	17.7031	21.9375	26.57	31.5187	36.6908	41.9908	47.326	52.6116	57.7743	62.7532	67.5014	71.9845	76.1803	80.0767	83.6703	86.9646	89.9687	92.6953	94.9611	96.9205	98.6822	100.261	101.672
High Demand Growth Rate
Alloy	2020	2021	2022	2023	2024	2025	2026	2027	2028	2029	2030	2031	2032	2033	2034	2035	2036	2037	2038	2039	2040	2041	2042	2043	2044	2045	2046	2047	2048	2049	2050
High-Mg (AA5182, Non-Ford)	28.3033	28.4789	28.8963	29.6416	30.7562	32.2275	33.9897	35.9375	37.947	39.8975	41.6896	43.2551	44.5601	45.6005	46.3964	46.9849	47.4138	47.735	47.9995	48.2532	48.534	48.8705	49.2821	49.7797	50.3674	51.0445	51.9029	52.8706	53.8976	54.9795	56.1125
Low-Mg (AA5754, Ford)	0.319477	0.538471	0.856633	1.29573	1.87531	2.61088	3.51224	4.58206	5.81499	7.19791	8.71109	10.3302	12.0285	13.7794	15.5578	17.342	19.1139	20.8597	22.5692	24.2359	25.8564	27.4296	28.9563	30.4389	31.8806	33.2856	34.6	35.8685	37.1224	38.3653	39.6007
High-Mg (AA5182, Ford)	0.199808	0.336792	0.535846	0.810653	1.17354	1.63438	2.19945	2.87061	3.64464	4.51338	5.46448	6.48259	7.55089	8.65248	9.7716	10.8944	12.0095	13.1081	14.1839	15.2326	16.2521	17.2417	18.2019	19.1343	20.0409	20.9243	21.7495	22.5455	23.3324	24.1125	24.8879
Low-Cu (AA6016, Non-Ford)	36.9353	36.9817	37.2635	37.8768	38.8622	40.1935	41.7801	43.485	45.1528	46.6371	47.8231	48.6399	49.0615	49.1014	48.8028	48.2292	47.4553	46.5587	45.6132	44.6835	43.8218	43.0667	42.4429	41.9632	41.631	41.4424	41.534	41.7949	42.1476	42.5832	43.0942
Low-Cu (AA6005C, Non-Ford)	36.9353	36.9817	37.2635	37.8768	38.8622	40.1935	41.7801	43.485	45.1528	46.6371	47.8231	48.6399	49.0615	49.1014	48.8028	48.2292	47.4553	46.5587	45.6132	44.6835	43.8218	43.0667	42.4429	41.9632	41.631	41.4424	41.534	41.7949	42.1476	42.5832	43.0942
Low-Cu (AA6005C, Ford)	0.938643	1.5809	2.51161	3.79075	5.46906	7.58288	10.1502	13.1689	16.6156	20.4485	24.6115	29.0388	33.661	38.4104	43.2245	48.0491	52.8397	57.5619	62.1906	66.7098	71.1104	75.3897	79.5498	83.5963	87.5375	91.3835	95.0546	98.6254	102.149	105.637	109.098
High-Cu (AA6111, Ford)	0.965677	1.62796	2.59083	3.92123	5.68012	7.91707	10.6647	13.9341	17.7111	21.9571	26.6119	31.6002	36.8389	42.2441	47.7374	53.2498	58.7246	64.1179	69.3978	74.5439	79.5452	84.3985	89.1064	93.6763	98.1186	102.446	106.473	110.353	114.189	117.993	121.775
Manufacturing Scrap (kt)
BAU
Alloy	2020	2021	2022	2023	2024	2025	2026	2027	2028	2029	2030	2031	2032	2033	2034	2035	2036	2037	2038	2039	2040	2041	2042	2043	2044	2045	2046	2047	2048	2049	2050
High-Mg (AA5182, Non-Ford)	41.2222	42.2629	43.3033	44.3439	45.3845	46.4251	47.4656	48.506	49.5467	50.5872	51.6278	52.6684	53.7089	54.7494	55.79	56.8306	57.8711	58.9116	59.9523	60.9928	62.0333	63.0739	64.1145	65.155	66.1956	67.2362	68.2767	69.3172	70.3578	71.3984	72.4389
Low-Mg (AA5754, Ford)	38.7169	39.6391	40.5614	41.4835	42.4057	43.3279	44.2501	45.1723	46.0945	47.0167	47.9389	48.861	49.7833	50.7054	51.6276	52.5498	53.472	54.3942	55.3164	56.2386	57.1608	58.083	59.0052	59.9274	60.8495	61.7717	62.6939	63.6162	64.5383	65.4605	66.3827
High-Mg (AA5182, Ford)	24.3329	24.9125	25.4921	26.0717	26.6512	27.2308	27.8104	28.39	28.9696	29.5492	30.1288	30.7083	31.2879	31.8675	32.4471	33.0267	33.6063	34.1858	34.7654	35.345	35.9246	36.5042	37.0837	37.6633	38.2429	38.8225	39.4021	39.9817	40.5612	41.1408	41.7204
Low-Cu (AA6016, Non-Ford)	24.215	24.869	25.5227	26.1767	26.8307	27.4847	28.1385	28.7923	29.4464	30.1003	30.7541	31.4082	32.062	32.7159	33.3699	34.0238	34.6776	35.3316	35.9856	36.6394	37.2934	37.9473	38.6013	39.2551	39.9091	40.5631	41.2169	41.8707	42.5248	43.1787	43.8326
Low-Cu (AA6005C, Non-Ford)	24.215	24.869	25.5227	26.1767	26.8307	27.4847	28.1385	28.7923	29.4464	30.1003	30.7541	31.4082	32.062	32.7159	33.3699	34.0238	34.6776	35.3316	35.9856	36.6394	37.2934	37.9473	38.6013	39.2551	39.9091	40.5631	41.2169	41.8707	42.5248	43.1787	43.8326
Low-Cu (AA6005C, Ford)	106.637	109.177	111.717	114.257	116.797	119.337	121.877	124.417	126.957	129.497	132.037	134.577	137.117	139.657	142.197	144.737	147.277	149.817	152.357	154.897	157.437	159.977	162.517	165.057	167.597	170.137	172.677	175.217	177.757	180.296	182.836
High-Cu (AA6111, Ford)	119.065	121.9	124.737	127.573	130.408	133.244	136.08	138.917	141.752	144.588	147.424	150.26	153.096	155.932	158.768	161.604	164.44	167.276	170.112	172.948	175.784	178.62	181.456	184.292	187.128	189.964	192.8	195.636	198.472	201.308	204.144
Low Demand Growth Rate
Alloy	2020	2021	2022	2023	2024	2025	2026	2027	2028	2029	2030	2031	2032	2033	2034	2035	2036	2037	2038	2039	2040	2041	2042	2043	2044	2045	2046	2047	2048	2049	2050
High-Mg (AA5182, Non-Ford)	41.2222	42.2629	43.3033	44.3439	45.3845	46.4251	46.4251	46.4251	46.4251	46.4251	46.4251	46.4251	46.4251	46.4251	46.4251	46.4251	46.4251	46.4251	46.4251	46.4251	46.4251	46.4251	46.4251	46.4251	46.4251	46.4251	46.4251	46.4251	46.4251	46.4251	46.4251
Low-Mg (AA5754, Ford)	38.7169	39.6391	40.5614	41.4835	42.4057	43.3279	43.3279	43.3279	43.3279	43.3279	43.3279	43.3279	43.3279	43.3279	43.3279	43.3279	43.3279	43.3279	43.3279	43.3279	43.3279	43.3279	43.3279	43.3279	43.3279	43.3279	43.3279	43.3279	43.3279	43.3279	43.3279
High-Mg (AA5182, Ford)	24.3329	24.9125	25.4921	26.0717	26.6512	27.2308	27.2308	27.2308	27.2308	27.2308	27.2308	27.2308	27.2308	27.2308	27.2308	27.2308	27.2308	27.2308	27.2308	27.2308	27.2308	27.2308	27.2308	27.2308	27.2308	27.2308	27.2308	27.2308	27.2308	27.2308	27.2308
Low-Cu (AA6016, Non-Ford)	24.215	24.869	25.5227	26.1767	26.8307	27.4847	27.4847	27.4847	27.4847	27.4847	27.4847	27.4847	27.4847	27.4847	27.4847	27.4847	27.4847	27.4847	27.4847	27.4847	27.4847	27.4847	27.4847	27.4847	27.4847	27.4847	27.4847	27.4847	27.4847	27.4847	27.4847
Low-Cu (AA6005C, Non-Ford)	24.215	24.869	25.5227	26.1767	26.8307	27.4847	27.4847	27.4847	27.4847	27.4847	27.4847	27.4847	27.4847	27.4847	27.4847	27.4847	27.4847	27.4847	27.4847	27.4847	27.4847	27.4847	27.4847	27.4847	27.4847	27.4847	27.4847	27.4847	27.4847	27.4847	27.4847
Low-Cu (AA6005C, Ford)	106.637	109.177	111.717	114.257	116.797	119.337	119.337	119.337	119.337	119.337	119.337	119.337	119.337	119.337	119.337	119.337	119.337	119.337	119.337	119.337	119.337	119.337	119.337	119.337	119.337	119.337	119.337	119.337	119.337	119.337	119.337
High-Cu (AA6111, Ford)	119.065	121.9	124.737	127.573	130.408	133.244	133.244	133.244	133.244	133.244	133.244	133.244	133.244	133.244	133.244	133.244	133.244	133.244	133.244	133.244	133.244	133.244	133.244	133.244	133.244	133.244	133.244	133.244	133.244	133.244	133.244
High Demand Growth Rate
Alloy	2020	2021	2022	2023	2024	2025	2026	2027	2028	2029	2030	2031	2032	2033	2034	2035	2036	2037	2038	2039	2040	2041	2042	2043	2044	2045	2046	2047	2048	2049	2050
High-Mg (AA5182, Non-Ford)	41.2222	42.2629	43.3033	44.3439	45.3845	46.4251	47.5838	48.7716	49.989	51.2367	52.5156	53.8262	55.1697	56.5466	57.9579	59.4043	60.8869	62.4063	63.9637	65.56	67.196	68.8728	70.5913	72.3528	74.1581	76.0085	77.905	79.8487	81.841	83.8829	85.9756
Low-Mg (AA5754, Ford)	38.7169	39.6391	40.5614	41.4835	42.4057	43.3279	44.3678	45.4326	46.523	47.6395	48.7829	49.9537	51.1526	52.3802	53.6374	54.9247	56.2428	57.5927	58.9749	60.3903	61.8396	63.3238	64.8436	66.3998	67.9934	69.6253	71.2963	73.0074	74.7595	76.5538	78.3911
High-Mg (AA5182, Ford)	24.3329	24.9125	25.4921	26.0717	26.6512	27.2308	27.8844	28.5536	29.2389	29.9406	30.6592	31.395	32.1485	32.9201	33.7102	34.5192	35.3477	36.196	37.0647	37.9542	38.8652	39.7979	40.7531	41.7312	42.7327	43.7583	44.8085	45.8839	46.9851	48.1127	49.2675
Low-Cu (AA6016, Non-Ford)	24.215	24.869	25.5227	26.1767	26.8307	27.4847	28.2028	28.9398	29.696	30.4718	31.2678	32.0843	32.9223	33.7818	34.6638	35.5686	36.497	37.4493	38.4265	39.4291	40.4576	41.5129	42.5954	43.7061	44.8456	46.0146	47.2141	48.4445	49.707	51.0021	52.3307
Low-Cu (AA6005C, Non-Ford)	24.215	24.869	25.5227	26.1767	26.8307	27.4847	28.2028	28.9398	29.696	30.4718	31.2678	32.0843	32.9223	33.7818	34.6638	35.5686	36.497	37.4493	38.4265	39.4291	40.4576	41.5129	42.5954	43.7061	44.8456	46.0146	47.2141	48.4445	49.707	51.0021	52.3307
Low-Cu (AA6005C, Ford)	106.637	109.177	111.717	114.257	116.797	119.337	122.201	125.134	128.137	131.213	134.362	137.586	140.888	144.27	147.732	151.278	154.908	158.626	162.433	166.332	170.324	174.411	178.597	182.884	187.273	191.767	196.37	201.083	205.909	210.85	215.911
High-Cu (AA6111, Ford)	119.065	121.9	124.737	127.573	130.408	133.244	136.442	139.717	143.07	146.504	150.02	153.621	157.307	161.083	164.949	168.908	172.961	177.112	181.363	185.716	190.173	194.737	199.411	204.197	209.097	214.116	219.254	224.517	229.905	235.423	241.073
LDV lifespan model based on Greene & Leard
Ingot Demand (kt)
BAU
Alloy	2020	2021	2022	2023	2024	2025	2026	2027	2028	2029	2030	2031	2032	2033	2034	2035	2036	2037	2038	2039	2040	2041	2042	2043	2044	2045	2046	2047	2048	2049	2050
High-Mg (AA5182, Non-Ford)	80.8913	82.9334	84.9751	87.017	89.0591	91.101	93.1428	95.1845	97.2266	99.2685	101.31	103.352	105.394	107.436	109.478	111.52	113.562	115.604	117.646	119.688	121.729	123.771	125.813	127.855	129.897	131.939	133.981	136.023	138.065	140.107	142.149
Low-Mg (AA5754, Ford)	75.9752	77.7847	79.5945	81.4041	83.2137	85.0233	86.833	88.6427	90.4522	92.2619	94.0716	95.8811	97.6908	99.5005	101.31	103.12	104.929	106.739	108.549	110.358	112.168	113.978	115.787	117.597	119.406	121.216	123.026	124.836	126.645	128.455	130.264
High-Mg (AA5182, Ford)	47.7491	48.8863	50.0238	51.1611	52.2984	53.4357	54.573	55.7104	56.8477	57.985	59.1224	60.2596	61.397	62.5344	63.6717	64.809	65.9464	67.0837	68.2209	69.3583	70.4956	71.633	72.7703	73.9076	75.0449	76.1822	77.3196	78.457	79.5942	80.7316	81.8689
Low-Cu (AA6016, Non-Ford)	47.5176	48.8011	50.0839	51.3671	52.6506	53.9338	55.2168	56.4998	57.7833	59.0665	60.3495	61.633	62.916	64.1992	65.4825	66.7657	68.0487	69.3319	70.6154	71.8984	73.1817	74.4649	75.7481	77.0312	78.3146	79.5979	80.8809	82.1639	83.4473	84.7306	86.0138
Low-Cu (AA6005C, Non-Ford)	47.5176	48.8011	50.0839	51.3671	52.6506	53.9338	55.2168	56.4998	57.7833	59.0665	60.3495	61.633	62.916	64.1992	65.4825	66.7657	68.0487	69.3319	70.6154	71.8984	73.1817	74.4649	75.7481	77.0312	78.3146	79.5979	80.8809	82.1639	83.4473	84.7306	86.0138
Low-Cu (AA6005C, Ford)	209.257	214.241	219.225	224.21	229.194	234.178	239.162	244.147	249.131	254.115	259.099	264.083	269.068	274.052	279.036	284.02	289.005	293.989	298.973	303.958	308.942	313.926	318.91	323.895	328.879	333.863	338.847	343.832	348.816	353.8	358.784
High-Cu (AA6111, Ford)	233.643	239.208	244.774	250.339	255.904	261.469	267.034	272.599	278.164	283.729	289.295	294.859	300.425	305.99	311.555	317.12	322.685	328.25	333.815	339.38	344.946	350.511	356.076	361.641	367.206	372.771	378.336	383.902	389.466	395.031	400.597
EOL Scrap (kt)
BAU
Alloy	2020	2021	2022	2023	2024	2025	2026	2027	2028	2029	2030	2031	2032	2033	2034	2035	2036	2037	2038	2039	2040	2041	2042	2043	2044	2045	2046	2047	2048	2049	2050
High-Mg (AA5182, Non-Ford)	27.596	27.3447	26.3192	25.2937	24.6347	23.6517	23.0917	24.1987	25.5492	26.9673	27.8485	28.2548	29.1314	29.5627	30.1423	29.368	29.0636	28.7177	27.1265	26.352	25.672	24.0207	23.7041	23.9586	23.8869	24.069	23.7192	24.3877	23.9399	24.6519	25.4469
Low-Mg (AA5754, Ford)	0.319477	0.538471	0.856633	1.29573	1.87531	2.61088	3.51224	4.58197	5.81467	7.1971	8.70932	10.3266	12.0219	13.7678	15.5386	17.3116	19.0675	20.7914	22.4718	24.1009	25.674	27.1887	28.6445	30.0426	31.3851	32.6749	33.8572	34.9756	36.0605	37.1145	38.1402
High-Mg (AA5182, Ford)	0.199808	0.336792	0.535846	0.810653	1.17354	1.63438	2.19945	2.87056	3.64445	4.51288	5.46337	6.48037	7.54676	8.64525	9.75958	10.8753	11.9804	13.0653	14.1227	15.1478	16.1375	17.0904	18.0061	18.8854	19.7296	20.5406	21.2827	21.9843	22.6649	23.3262	23.9698
Low-Cu (AA6016, Non-Ford)	36.0063	35.4916	33.8768	32.1618	30.8162	28.9211	27.4553	28.0543	28.8564	29.6413	29.6304	28.9249	28.7859	28.0291	27.4518	25.0962	23.3703	21.6146	18.2525	16.0004	13.9129	10.5904	9.06329	8.32983	7.20699	6.45633	5.06141	5.04434	3.58816	3.68193	3.9105
Low-Cu (AA6005C, Non-Ford)	36.0063	35.4916	33.8768	32.1618	30.8162	28.9211	27.4553	28.0543	28.8564	29.6413	29.6304	28.9249	28.7859	28.0291	27.4518	25.0962	23.3703	21.6146	18.2525	16.0004	13.9129	10.5904	9.06329	8.32983	7.20699	6.45633	5.06141	5.04434	3.58816	3.68193	3.9105
Low-Cu (AA6005C, Ford)	0.938643	1.5809	2.51161	3.79075	5.46906	7.58288	10.1502	13.1686	16.6146	20.4462	24.6063	29.0284	33.6419	38.3772	43.1696	47.9624	52.7081	57.3692	61.9171	66.3322	70.602	74.7202	78.6854	82.4999	86.1688	89.6992	93.0084	96.1682	99.2293	102.2	105.087
High-Cu (AA6111, Ford)	0.965677	1.62796	2.59083	3.92123	5.68012	7.91707	10.6647	13.9338	17.7102	21.9546	26.6065	31.5895	36.8189	42.209	47.679	53.157	58.5829	63.9091	69.0998	74.1305	78.9862	83.6595	88.1493	92.4592	96.5959	100.569	104.189	107.606	110.922	114.144	117.28
Manufacturing Scrap (kt)
BAU
Alloy	2020	2021	2022	2023	2024	2025	2026	2027	2028	2029	2030	2031	2032	2033	2034	2035	2036	2037	2038	2039	2040	2041	2042	2043	2044	2045	2046	2047	2048	2049	2050
High-Mg (AA5182, Non-Ford)	41.2222	42.2629	43.3033	44.3439	45.3845	46.4251	47.4656	48.506	49.5467	50.5872	51.6278	52.6684	53.7089	54.7494	55.79	56.8306	57.8711	58.9116	59.9523	60.9928	62.0333	63.0739	64.1145	65.155	66.1956	67.2362	68.2767	69.3172	70.3578	71.3984	72.4389
Low-Mg (AA5754, Ford)	38.7169	39.6391	40.5614	41.4835	42.4057	43.3279	44.2501	45.1723	46.0945	47.0167	47.9389	48.861	49.7833	50.7054	51.6276	52.5498	53.472	54.3942	55.3164	56.2386	57.1608	58.083	59.0052	59.9274	60.8495	61.7717	62.6939	63.6162	64.5383	65.4605	66.3827
High-Mg (AA5182, Ford)	24.3329	24.9125	25.4921	26.0717	26.6512	27.2308	27.8104	28.39	28.9696	29.5492	30.1288	30.7083	31.2879	31.8675	32.4471	33.0267	33.6063	34.1858	34.7654	35.345	35.9246	36.5042	37.0837	37.6633	38.2429	38.8225	39.4021	39.9817	40.5612	41.1408	41.7204
Low-Cu (AA6016, Non-Ford)	24.215	24.869	25.5227	26.1767	26.8307	27.4847	28.1385	28.7923	29.4464	30.1003	30.7541	31.4082	32.062	32.7159	33.3699	34.0238	34.6776	35.3316	35.9856	36.6394	37.2934	37.9473	38.6013	39.2551	39.9091	40.5631	41.2169	41.8707	42.5248	43.1787	43.8326
Low-Cu (AA6005C, Non-Ford)	24.215	24.869	25.5227	26.1767	26.8307	27.4847	28.1385	28.7923	29.4464	30.1003	30.7541	31.4082	32.062	32.7159	33.3699	34.0238	34.6776	35.3316	35.9856	36.6394	37.2934	37.9473	38.6013	39.2551	39.9091	40.5631	41.2169	41.8707	42.5248	43.1787	43.8326
Low-Cu (AA6005C, Ford)	106.637	109.177	111.717	114.257	116.797	119.337	121.877	124.417	126.957	129.497	132.037	134.577	137.117	139.657	142.197	144.737	147.277	149.817	152.357	154.897	157.437	159.977	162.517	165.057	167.597	170.137	172.677	175.217	177.757	180.296	182.836
High-Cu (AA6111, Ford)	119.065	121.9	124.737	127.573	130.408	133.244	136.08	138.917	141.752	144.588	147.424	150.26	153.096	155.932	158.768	161.604	164.44	167.276	170.112	172.948	175.784	178.62	181.456	184.292	187.128	189.964	192.8	195.636	198.472	201.308	204.144

## Sheet: 2. Compositions
	Cu	Mg	Mn	Si	Fe	Zn	Al
Primary Aluminum
P1020 (baseline grade)	0.0005	0.001	0.0008	0.07	0.17	0.003	bal
P0610	0.0002	0.002	0.0002	0.05	0.1	0.003	bal
Teal Sheets
Non-Ford 5xxx (AA5182)	≤ 0.15	4.0 - 5.0	0.2 - 0.5	≤ 0.2	≤ 0.35	≤ 0.25	bal
Ford Low Mg ("AA5754")	≤ 0.1	2.6 - 3.6	≤ 0.5	≤ 0.4	≤ 0.4	≤ 0.2	bal
Ford High Mg ("AA5182")	≤ 0.15	4.0 - 5.0	0.2 - 0.5	≤ 0.2	≤ 0.35	≤ 0.25	bal
Non-Ford 6xxx (6005C)	≤ 0.35	0.4 - 0.8	≤ 0.5	0.4 - 0.9	≤ 0.35	≤ 0.25	bal
Non-Ford 6xxx (6016)	≤ 0.2	0.25 - 0.6	≤ 0.2	1 - 1.5	≤ 0.5	≤ 0.2	bal
Ford Low Cu ("AA6005C")	≤ 0.35	0.4 - 0.8	≤ 0.5	0.4 - 0.9	≤ 0.35	≤ 0.25	bal
Ford High Cu ("AA6111")	0.5 - 0.9	0.5 - 1.0	0.1 - 0.45	0.6 - 1.1	≤ 0.4	≤ 0.15	bal
OEM specifications
Non-Ford 5xxx (AA5182)	≤ 0.1	4.2 - 5.0	0.2 - 0.5	≤ 0.2	≤ 0.35	≤ 0.1	bal
Ford Low Mg ("AA5754")	≤ 0.1	2.9 - 3.5	≤ 0.5	≤ 0.25	≤ 0.35	≤ 0.1	bal
Ford High Mg ("AA5182")	≤ 0.1	4.2 - 5.0	0.2 - 0.5	≤ 0.2	≤ 0.35	≤ 0.1	bal
Non-Ford 6xxx (6005C)	≤ 0.2	0.4 - 0.8	≤ 0.15	0.5 - 1	≤ 0.3	≤ 0.1	bal
Non-Ford 6xxx (6016)	≤ 0.1	0.3 - 0.6	≤ 0.2	1 - 1.3	≤ 0.3	≤ 0.2	bal
Ford Low Cu ("AA6005C")	≤ 0.2	0.4 - 0.8	≤ 0.15	0.5 - 1	≤ 0.3	≤ 0.1	bal
Ford High Cu ("AA6111")	0.5 - 0.8	0.55 - 0.95	≤ 0.3	0.55 - 0.95	≤ 0.3	≤ 0.1	bal
Baseline supplier (alloy product chemistries used in this analysis)
Non-Ford 5xxx (AA5182)	≤ 0.055	4.2 - 4.6	0.2 - 0.32	≤ 0.1	≤ 0.22	≤ 0.07	bal
Ford Low Mg ("AA5754")	≤ 0.1	2.9 - 3.5	≤ 0.5	≤ 0.25	≤ 0.35	≤ 0.1	bal
Ford High Mg ("AA5182")	≤ 0.1	4.2 - 5.0	0.2 - 0.5	≤ 0.2	≤ 0.35	≤ 0.1	bal
Non-Ford 6xxx (6005C)	≤ 0.12	0.4 - 0.54	≤ 0.15	0.5 - 0.63	≤ 0.21	≤ 0.05	bal
Non-Ford 6xxx (6016)	≤ 0.03	0.4 - 0.5	≤ 0.1	1 - 1.2	≤ 0.2	≤ 0.01	bal
Ford Low Cu ("AA6005C")	≤ 0.2	0.4 - 0.8	≤ 0.15	0.5 - 1	≤ 0.3	≤ 0.1	bal
Ford High Cu ("AA6111")	0.5 - 0.8	0.55 - 0.95	≤ 0.3	0.55 - 0.95	≤ 0.3	≤ 0.1	bal
Alternative strategy alloy product compositions
HRC 5xxx	0.25 - 0.35	3.3 - 3.4	0.25 - 0.35	0.2 - 0.3	0.3 - 0.4	-	bal
HRC 6xxx	0.75 - 0.85	0.85 - 0.95	0.3 - 0.4	0.85 - 0.95	0.3 - 0.4	-	bal
Twitch (ELV scrap chemistries)
Baseline
2025	1.5342	2.16344	0.296288	4.88744	0.589161	1.00793	bal
2026	1.5165	2.23772	0.295567	4.8312	0.585756	1.00508	bal
2027	1.49684	2.32056	0.294795	4.76895	0.581892	1.00115	bal
2028	1.47575	2.40978	0.293992	4.70227	0.577683	0.996307	bal
2029	1.45368	2.50333	0.293172	4.63261	0.573247	0.990773	bal
2030	1.43122	2.59882	0.292351	4.56166	0.568725	0.98485	bal
2031	1.4087	2.69465	0.291536	4.4905	0.564211	0.978774	bal
2032	1.38634	2.78983	0.290725	4.41977	0.55976	0.97277	bal
2033	1.36431	2.88352	0.289914	4.34996	0.555424	0.967022	bal
2034	1.34277	2.97494	0.2891	4.2816	0.551233	0.961679	bal
2035	1.32179	3.06368	0.288276	4.21489	0.547202	0.956859	bal
2036	1.30153	3.14893	0.287443	4.15042	0.543369	0.952655	bal
2037	1.28204	3.23043	0.286595	4.08834	0.539726	0.949121	bal
2038	1.26335	3.30798	0.285728	4.02877	0.536273	0.946275	bal
2039	1.24548	3.38145	0.284843	3.97183	0.533003	0.944101	bal
2040	1.22858	3.45019	0.283946	3.91803	0.529934	0.942591	bal
2041	1.19788	3.5682	0.28213	3.82159	0.524042	0.939952	bal
2042	1.18385	3.62541	0.281386	3.77583	0.52188	0.940068	bal
2043	1.17062	3.67882	0.280639	3.73271	0.519857	0.940592	bal
2044	1.15813	3.72871	0.279893	3.69207	0.517958	0.941457	bal
2045	1.14634	3.77538	0.279149	3.65372	0.516168	0.942599	bal
2046	1.13513	3.81908	0.278385	3.61749	0.514428	0.943961	bal
2047	1.12447	3.86017	0.277623	3.58315	0.512759	0.945494	bal
2048	1.11434	3.89895	0.276873	3.55052	0.511175	0.947156	bal
2049	1.10466	3.93571	0.276138	3.51942	0.509665	0.948912	bal
2050	1.09541	3.97066	0.275416	3.48968	0.508219	0.950733	bal
ABS demand shift of 5xxx to 6xxx
2025	1.5342	2.16344	0.296288	4.88744	0.589161	1.00793	bal
2026	1.5165	2.23772	0.295567	4.8312	0.585756	1.00508	bal
2027	1.49684	2.32056	0.294795	4.76895	0.581892	1.00115	bal
2028	1.47575	2.40978	0.293992	4.70227	0.577683	0.996307	bal
2029	1.45368	2.50333	0.293172	4.63261	0.573247	0.990773	bal
2030	1.43122	2.59882	0.292351	4.56166	0.568725	0.98485	bal
2031	1.4087	2.69465	0.291536	4.4905	0.564211	0.978774	bal
2032	1.38634	2.78983	0.290725	4.41977	0.55976	0.97277	bal
2033	1.36431	2.88352	0.289914	4.34996	0.555424	0.967022	bal
2034	1.34277	2.97494	0.2891	4.2816	0.551233	0.961679	bal
2035	1.32179	3.06368	0.288276	4.21489	0.547202	0.956859	bal
2036	1.30153	3.14893	0.287443	4.15042	0.543369	0.952655	bal
2037	1.28204	3.23043	0.286595	4.08834	0.539726	0.949121	bal
2038	1.26335	3.30798	0.285728	4.02877	0.536273	0.946275	bal
2039	1.24548	3.38145	0.284843	3.97183	0.533003	0.944101	bal
2040	1.22858	3.45019	0.283946	3.91803	0.529934	0.942591	bal
2041	1.26572	3.26705	0.282792	4.04286	0.538021	0.948332	bal
2042	1.30286	3.08391	0.281637	4.16769	0.546107	0.954073	bal
2043	1.34001	2.90077	0.280482	4.29251	0.554194	0.959814	bal
2044	1.37715	2.71764	0.279328	4.41734	0.56228	0.965555	bal
2045	1.41429	2.5345	0.278173	4.54217	0.570367	0.971295	bal
2046	1.45143	2.35136	0.277019	4.66699	0.578454	0.977036	bal
2047	1.48857	2.16822	0.275864	4.79182	0.58654	0.982777	bal
2048	1.52572	1.98508	0.274709	4.91665	0.594627	0.988518	bal
2049	1.56286	1.80194	0.273555	5.04147	0.602713	0.994259	bal
2050	1.6	1.6188	0.2724	5.1663	0.6108	1	bal
Castings removal
2025	1.5342	2.16344	0.296288	4.88744	0.589161	1.00793	bal
2026	0.29633	1.17484	0.193209	0.977108	0.355688	0.340526	bal
2027	0.302668	1.1787	0.196281	0.976284	0.357508	0.335801	bal
2028	0.30857	1.18272	0.199373	0.975839	0.358971	0.330312	bal
2029	0.314056	1.18673	0.202384	0.975649	0.360188	0.32447	bal
2030	0.319209	1.19054	0.20523	0.975571	0.361304	0.318685	bal
2031	0.324105	1.19407	0.20787	0.975501	0.362416	0.313218	bal
2032	0.328759	1.19725	0.21027	0.975373	0.363574	0.308275	bal
2033	0.333237	1.20005	0.212422	0.975129	0.364834	0.303977	bal
2034	0.337488	1.20243	0.214308	0.974765	0.366177	0.300388	bal
2035	0.341499	1.20441	0.215928	0.974273	0.367596	0.29754	bal
2036	0.34527	1.20598	0.217287	0.973654	0.369087	0.295425	bal
2037	0.348719	1.20716	0.218383	0.972943	0.37059	0.294017	bal
2038	0.351826	1.20798	0.219232	0.97216	0.372077	0.293257	bal
2039	0.35457	1.20847	0.219848	0.971333	0.373517	0.293076	bal
2040	0.356907	1.20865	0.220245	0.970495	0.374866	0.293402	bal
2041	0.358876	1.20858	0.220454	0.969656	0.376124	0.294154	bal
2042	0.360438	1.20829	0.220485	0.968848	0.37725	0.295265	bal
2043	0.361664	1.2078	0.220372	0.968068	0.378264	0.296662	bal
2044	0.36255	1.20717	0.220134	0.967339	0.379146	0.298269	bal
2045	0.363114	1.20642	0.21979	0.966669	0.379891	0.300037	bal
2046	0.363473	1.20559	0.219375	0.966034	0.380552	0.301914	bal
2047	0.36362	1.20469	0.218898	0.965448	0.381113	0.303862	bal
2048	0.363588	1.20376	0.218377	0.964909	0.381584	0.305845	bal
2049	0.363426	1.20279	0.217825	0.964408	0.381989	0.307844	bal
2050	0.363141	1.20182	0.21725	0.96395	0.382322	0.309833	bal
ELV ABS separation by family
5xxx bin (2026-2050)	0.255	2.7	0.175	0.86	0.365	0.15	bal
6xxx bin (2026-2050)	0.34	0.545	0.125	0.69	0.31	0.06	bal
Other' bin (2026-2050)	1.2725	3.7175	0.2175	6.8975	0.5475	0.7075	bal
Ford F-150 Twitch (ELV scrap chemistries)
[Ford ABS case study] Baseline
2025	1.16065	2.32424	0.331168	3.67067	0.534114	0.60632	bal
2026	1.16142	2.32452	0.331369	3.67267	0.534251	0.606703	bal
2027	1.16228	2.32483	0.331592	3.6749	0.534403	0.607129	bal
2028	1.16317	2.32516	0.331826	3.67722	0.534562	0.607574	bal
2029	1.16406	2.32549	0.332057	3.67952	0.534719	0.608015	bal
2030	1.1649	2.3258	0.332276	3.6817	0.534868	0.608433	bal
2031	1.16568	2.32608	0.332477	3.6837	0.535005	0.608816	bal
2032	1.16636	2.32633	0.332655	3.68547	0.535126	0.609155	bal
2033	1.16695	2.32654	0.332809	3.68701	0.535231	0.609449	bal
2034	1.16745	2.32673	0.33294	3.68831	0.53532	0.609698	bal
2035	1.16787	2.32688	0.333048	3.68938	0.535393	0.609904	bal
2036	1.16821	2.327	0.333136	3.69026	0.535453	0.610072	bal
2037	1.16848	2.3271	0.333207	3.69097	0.535502	0.610207	bal
2038	1.16869	2.32718	0.333263	3.69152	0.53554	0.610314	bal
2039	1.16886	2.32724	0.333306	3.69195	0.535569	0.610396	bal
2040	1.16899	2.32729	0.333339	3.69228	0.535591	0.610459	bal
2041	1.16908	2.32732	0.333364	3.69252	0.535608	0.610506	bal
2042	1.16915	2.32735	0.333381	3.6927	0.53562	0.610539	bal
2043	1.1692	2.32737	0.333394	3.69282	0.535628	0.610563	bal
2044	1.16923	2.32738	0.333402	3.6929	0.535634	0.610578	bal
2045	1.16924	2.32738	0.333406	3.69295	0.535637	0.610587	bal
2046	1.16914	2.32735	0.33338	3.69268	0.535619	0.610536	bal
2047	1.16901	2.3273	0.333344	3.69233	0.535595	0.610469	bal
2048	1.16889	2.32725	0.333314	3.69203	0.535574	0.61041	bal
2049	1.16879	2.32722	0.333287	3.69176	0.535556	0.61036	bal
2050	1.1687	2.32718	0.333264	3.69153	0.53554	0.610315	bal
[Ford ABS case study] ABS demand shift of 5xxx to 6xxx
2025	1.16065	2.32424	0.331168	3.67067	0.534114	0.60632	bal
2026	1.16142	2.32452	0.331369	3.67267	0.534251	0.606703	bal
2027	1.16228	2.32483	0.331592	3.6749	0.534403	0.607129	bal
2028	1.16317	2.32516	0.331826	3.67722	0.534562	0.607574	bal
2029	1.16406	2.32549	0.332057	3.67952	0.534719	0.608015	bal
2030	1.1649	2.3258	0.332276	3.6817	0.534868	0.608433	bal
2031	1.16568	2.32608	0.332477	3.6837	0.535005	0.608816	bal
2032	1.16636	2.32633	0.332655	3.68547	0.535126	0.609155	bal
2033	1.16695	2.32654	0.332809	3.68701	0.535231	0.609449	bal
2034	1.16745	2.32673	0.33294	3.68831	0.53532	0.609698	bal
2035	1.16787	2.32688	0.333048	3.68938	0.535393	0.609904	bal
2036	1.16821	2.327	0.333136	3.69026	0.535453	0.610072	bal
2037	1.16848	2.3271	0.333207	3.69097	0.535502	0.610207	bal
2038	1.16869	2.32718	0.333263	3.69152	0.53554	0.610314	bal
2039	1.16886	2.32724	0.333306	3.69195	0.535569	0.610396	bal
2040	1.16899	2.32729	0.333339	3.69228	0.535591	0.610459	bal
2041	1.16907	2.29705	0.330311	3.69492	0.5364	0.609992	bal
2042	1.16916	2.26681	0.327283	3.69756	0.537208	0.609524	bal
2043	1.16925	2.23657	0.324255	3.70021	0.538016	0.609057	bal
2044	1.16933	2.20633	0.321227	3.70285	0.538824	0.608589	bal
2045	1.16942	2.17609	0.318198	3.70549	0.539633	0.608122	bal
2046	1.16951	2.14585	0.31517	3.70813	0.540441	0.607655	bal
2047	1.16959	2.11561	0.312142	3.71077	0.541249	0.607187	bal
2048	1.16968	2.08537	0.309114	3.71341	0.542058	0.60672	bal
2049	1.16976	2.05513	0.306086	3.71606	0.542866	0.606252	bal
2050	1.16985	2.02489	0.303058	3.7187	0.543674	0.605785	bal
[Ford ABS case study] Rivet reduction
2025	1.16065	2.32424	0.331168	3.67067	0.534114	0.60632	bal
2026	1.16142	2.32452	0.331369	3.67267	0.534251	0.606703	bal
2027	1.16228	2.32483	0.331592	3.6749	0.534403	0.607129	bal
2028	1.16317	2.32516	0.331826	3.67722	0.534562	0.607574	bal
2029	1.16406	2.32549	0.332057	3.67952	0.534719	0.608015	bal
2030	1.1649	2.3258	0.332276	3.6817	0.534868	0.608433	bal
2031	1.16568	2.32608	0.332477	3.6837	0.535005	0.608816	bal
2032	1.16636	2.32633	0.332655	3.68547	0.535126	0.609155	bal
2033	1.16695	2.32654	0.332809	3.68701	0.535231	0.609449	bal
2034	1.16745	2.32673	0.33294	3.68831	0.53532	0.609698	bal
2035	1.16787	2.32688	0.333048	3.68938	0.535393	0.609904	bal
2036	1.16821	2.327	0.333136	3.69026	0.535453	0.610072	bal
2037	1.16848	2.3271	0.333207	3.69097	0.535502	0.610207	bal
2038	1.16869	2.32718	0.333263	3.69152	0.53554	0.610314	bal
2039	1.16886	2.32724	0.333306	3.69195	0.535569	0.610396	bal
2040	1.16899	2.32729	0.333339	3.69228	0.535591	0.610459	bal
2041	1.16816	2.32703	0.333104	3.6901	0.532605	0.610015	bal
2042	1.16734	2.32678	0.332868	3.68792	0.529618	0.609571	bal
2043	1.16651	2.32652	0.332633	3.68574	0.526632	0.609127	bal
2044	1.16569	2.32627	0.332397	3.68356	0.523646	0.608683	bal
2045	1.16486	2.32601	0.332162	3.68138	0.520659	0.60824	bal
2046	1.16403	2.32576	0.331926	3.67919	0.517673	0.607796	bal
2047	1.16321	2.32551	0.331691	3.67701	0.514686	0.607352	bal
2048	1.16238	2.32525	0.331455	3.67483	0.5117	0.606908	bal
2049	1.16156	2.325	0.331219	3.67265	0.508713	0.606464	bal
2050	1.16073	2.32474	0.330984	3.67047	0.505727	0.60602	bal
[Ford ABS case study] Processing Zorba into Twitch by size
Twitch from Zorba small (2026-2050)	2.79104	5.26016	0.325376	6.39781	0.746622	1.83996	bal
Twitch from Zorba medium (2026-2050)	1.31848	3.0581	0.321767	4.34941	0.556418	2.63866	bal
Twitch from Zorba large (2026-2050)	1.1774	3.56836	0.32148	4.01974	0.525998	0.57407	bal
Twitch from NF oversized (2026-2050)	0.945986	2.44636	0.300169	3.66266	0.489392	0.368934	bal
[Ford ABS case study] ELV ABS separation by family
5xxx bin (2026-2050)	0.279002	3.12872	0.42082	0.964057	0.331977	0.0966168	bal
6xxx bin (2026-2050)	0.420948	0.747416	0.23939	0.894208	0.231825	0.0826855	bal
"Other" bin (2026-2050)	1.77939	0.377964	0.416699	7.86242	0.934864	0.825587	bal
[Ford ABS case study] Enhanced vehicle disassembly before shredding (VD1)
Wheel (11% wt. % of all Twitch) (2026-2050)	2	0.5	0.5	7.25	1	0.1	bal
ABS in box (13% wt. % of all Twitch) (2026-2050)	0.328167	0.731883	0.190607	0.728688	0.199858	0.0199853	bal
ABS in cab (50% wt. % of all Twitch) (2026-2050)	0.82948	1.38957	0.302395	0.635429	0.212467	0.686359	bal
Other (25% wt. % of all Twitch) (2026-2050)	1.41132	5.09104	0.407689	5.97111	0.742899	0.651065	bal
[Ford ABS case study] Enhanced vehicle disassembly before shredding (VD2)
Wheel (11% wt. % of all Twitch) (2026-2050)	2	0.5	0.5	7.25	1	0.1	bal
ABS in box (11% wt. % of all Twitch) (2026-2050)	0.328167	0.731883	0.190607	0.728688	0.199858	0.0199853	bal
ABS in hood & tailgate (5% wt. % of all Twitch) (2026-2050)	0.250519	0.61684	0.16684	0.75	0.200015	0.02	bal
ABS in doors (12% wt. % of all Twitch) (2026-2050)	0.254218	2.72806	0.312426	0.403003	0.226549	2.37518	bal
ABS in BIW & fenders (38% wt. % of all Twitch) (2026-2050)	0.418215	1.05259	0.321001	0.705496	0.200006	0.0534662	bal
Other (23% wt. % of all Twitch) (2026-2050)	2.0319	5.02285	0.401938	5.80844	0.737622	0.853554	bal

## Sheet: 3. Emissions intensities
This sheet contains temporal emissions intensities for the aluminum sheet supply under 3 scenarios:
1. Frozen Impacts
2. Moderate decarbonization
3. Aggressive decarbonization
Pathway	Upstream (ore to metal)			Downstream (metal to car)
Frozen	Frozen process and electricity grid impacts and frozen process yields			Frozen process and electricity grid impacts and frozen process yields
Moderate Decarbonization	A linear decrease in electricity emission intensity of primary production to Canadian levels (hydropower) plus a linear increase in inert anode use to 100% by 2050. Otherwise, nothing changes.			Grid decarbonization by 2050 (IRA Ref. Case)
Aggressive Decarbonization	AA decarbonization scenario, which represents a 61% (24%) decrease in primary (secondary) production emissions by 2035 and 94% (84%) by 2050 from 2016 levels.			Grid decarbonization by 2035, green H2 used for process heat
Frozen decarbonization scenerio impact intensities	Emissions intensity (kg.CO2eq/kg_out)
Process	2016	2017	2018	2019	2020	2021	2022	2023	2024	2025	2026	2027	2028	2029	2030	2031	2032	2033	2034	2035	2036	2037	2038	2039	2040	2041	2042	2043	2044	2045	2046	2047	2048	2049	2050
Primary production (eP)	8.51	8.42232	8.33463	8.24695	8.15927	8.07158	8.07158	8.07158	8.07158	8.07158	8.07158	8.07158	8.07158	8.07158	8.07158	8.07158	8.07158	8.07158	8.07158	8.07158	8.07158	8.07158	8.07158	8.07158	8.07158	8.07158	8.07158	8.07158	8.07158	8.07158	8.07158	8.07158	8.07158	8.07158	8.07158
Secondary production furnace (eS)	0.513	0.513	0.513	0.513	0.513	0.513	0.513	0.513	0.513	0.513	0.513	0.513	0.513	0.513	0.513	0.513	0.513	0.513	0.513	0.513	0.513	0.513	0.513	0.513	0.513	0.513	0.513	0.513	0.513	0.513	0.513	0.513	0.513	0.513	0.513
Scrap preparation (post-consumer scrap only) (eEOL)	0.043693	0.043693	0.043693	0.043693	0.043693	0.043693	0.043693	0.043693	0.043693	0.043693	0.043693	0.043693	0.043693	0.043693	0.043693	0.043693	0.043693	0.043693	0.043693	0.043693	0.043693	0.043693	0.043693	0.043693	0.043693	0.043693	0.043693	0.043693	0.043693	0.043693	0.043693	0.043693	0.043693	0.043693	0.043693
LIBS (eT-EOL)	0.0003	0.0003	0.0003	0.0003	0.0003	0.0003	0.0003	0.0003	0.0003	0.0003	0.0003	0.0003	0.0003	0.0003	0.0003	0.0003	0.0003	0.0003	0.0003	0.0003	0.0003	0.0003	0.0003	0.0003	0.0003	0.0003	0.0003	0.0003	0.0003	0.0003	0.0003	0.0003	0.0003	0.0003	0.0003
Downstream processes	1.20461	1.20461	1.20461	1.20461	1.20461	1.20461	1.20461	1.20461	1.20461	1.20461	1.20461	1.20461	1.20461	1.20461	1.20461	1.20461	1.20461	1.20461	1.20461	1.20461	1.20461	1.20461	1.20461	1.20461	1.20461	1.20461	1.20461	1.20461	1.20461	1.20461	1.20461	1.20461	1.20461	1.20461	1.20461
Rolling (eR)	0.623	0.623	0.623	0.623	0.623	0.623	0.623	0.623	0.623	0.623	0.623	0.623	0.623	0.623	0.623	0.623	0.623	0.623	0.623	0.623	0.623	0.623	0.623	0.623	0.623	0.623	0.623	0.623	0.623	0.623	0.623	0.623	0.623	0.623	0.623
Blanking & Stamping (eBS)	0.012	0.012	0.012	0.012	0.012	0.012	0.012	0.012	0.012	0.012	0.012	0.012	0.012	0.012	0.012	0.012	0.012	0.012	0.012	0.012	0.012	0.012	0.012	0.012	0.012	0.012	0.012	0.012	0.012	0.012	0.012	0.012	0.012	0.012	0.012
Assembly (eA)	0.251	0.251	0.251	0.251	0.251	0.251	0.251	0.251	0.251	0.251	0.251	0.251	0.251	0.251	0.251	0.251	0.251	0.251	0.251	0.251	0.251	0.251	0.251	0.251	0.251	0.251	0.251	0.251	0.251	0.251	0.251	0.251	0.251	0.251	0.251
Moderate decarbonization scenario impact intensities	Emissions intensity (kg.CO2eq/kg_out)
Process	2016	2017	2018	2019	2020	2021	2022	2023	2024	2025	2026	2027	2028	2029	2030	2031	2032	2033	2034	2035	2036	2037	2038	2039	2040	2041	2042	2043	2044	2045	2046	2047	2048	2049	2050
Primary production (eP)	8.51	8.42232	8.33463	8.24695	8.15927	8.07158	8.07158	8.07158	8.07158	7.90152	7.73146	7.5614	7.39134	7.22128	7.05122	6.88116	6.7111	6.54103	6.37097	6.20091	6.03085	5.86079	5.69073	5.52067	5.35061	5.18055	5.01049	4.84043	4.67037	4.5003	4.33024	4.16018	3.99012	3.82006	3.65
Secondary production furnace (eS)	0.513	0.513	0.513	0.513	0.513	0.513	0.513	0.513	0.513	0.513	0.513	0.513	0.513	0.513	0.513	0.513	0.513	0.513	0.513	0.513	0.513	0.513	0.513	0.513	0.513	0.513	0.513	0.513	0.513	0.513	0.513	0.513	0.513	0.513	0.513
Scrap preparation (post-consumer scrap only) (eEOL)	0.043693	0.043693	0.043693	0.043693	0.043693	0.043693	0.043693	0.043693	0.043693	0.0431579	0.0431579	0.0431579	0.0431579	0.0431579	0.0431579	0.0431579	0.0431579	0.0431579	0.0431579	0.0431579	0.0431579	0.0431579	0.0431579	0.0431579	0.0431579	0.0431579	0.0431579	0.0431579	0.0431579	0.0431579	0.0431579	0.0431579	0.0431579	0.0431579	0.0431579
LIBS (eT-EOL)	0.0003	0.0003	0.0003	0.0003	0.0003	0.0003	0.0003	0.00028724	0.000274479	0.000261719	0.000240402	0.000219086	0.000197769	0.000176453	0.000155137	0.000151564	0.000147991	0.000144419	0.000140846	0.000137273	0.000136102	0.000134931	0.00013376	0.000132589	0.000131417	0.000130228	0.000129039	0.000127849	0.00012666	0.000125471	0.000123651	0.000121831	0.000120011	0.000118192	0.000116372
Downstream processes	1.26106	1.26106	1.26106	1.26106	1.26106	1.26106	1.26106	1.26106	1.26106	1.2609	1.21356	1.16621	1.11887	1.07152	1.02419	1.01624	1.00832	1.00037	0.992442	0.984513	0.981906	0.979298	0.976706	0.974098	0.971506	0.968853	0.966215	0.963577	0.960939	0.958301	0.954253	0.950205	0.946173	0.942125	0.938092
Rolling (eR)	0.623	0.623	0.623	0.623	0.623	0.623	0.623	0.623	0.623	0.622727	0.602946	0.583164	0.563383	0.543601	0.523826	0.520507	0.517194	0.513875	0.510562	0.50725	0.50616	0.505071	0.503987	0.502898	0.501815	0.500706	0.499604	0.498502	0.4974	0.496298	0.494607	0.492915	0.491231	0.489539	0.487854
Blanking & Stamping (eBS)	0.0681671	0.0681671	0.0681671	0.0681671	0.0681671	0.0681671	0.0681671	0.0681671	0.0681671	0.0681671	0.0626148	0.0570625	0.0515102	0.0459579	0.0404074	0.0394758	0.038546	0.0376144	0.0366846	0.0357548	0.035449	0.0351432	0.0348391	0.0345334	0.0342293	0.0339182	0.0336089	0.0332995	0.0329902	0.0326808	0.0322061	0.0317314	0.0312585	0.0307838	0.0303109
Assembly (eA)	0.251	0.251	0.251	0.251	0.251	0.251	0.251	0.251	0.251	0.251256	0.239387	0.227517	0.215647	0.203777	0.191911	0.18992	0.187932	0.18594	0.183952	0.181965	0.181311	0.180657	0.180007	0.179354	0.178704	0.178038	0.177377	0.176716	0.176054	0.175393	0.174378	0.173364	0.172353	0.171338	0.170327
Aggressive decarbonization scenario impact intensities	Emissions intensity (kg.CO2eq/kg_out)					From 2021 onwards, the primary and secondary production emissions intensity data is from Ref [1]
Process	2016	2017	2018	2019	2020	2021	2022	2023	2024	2025	2026	2027	2028	2029	2030	2031	2032	2033	2034	2035	2036	2037	2038	2039	2040	2041	2042	2043	2044	2045	2046	2047	2048	2049	2050
Primary production (eP)	8.51	8.42232	8.33463	8.24695	8.15927	8.07158	8.07158	7.94368	7.81624	7.66672	7.17654	6.65668	6.10988	5.54826	4.86322	4.16581	3.948	3.73225	3.51342	3.28468	3.07562	2.86394	2.65019	2.43923	2.23444	2.05584	1.87779	1.70379	1.52586	1.34852	1.17553	1.00314	0.825441	0.657869	0.482423
Secondary production furnace (eS)	0.513	0.513	0.513	0.513	0.513	0.509638	0.509638	0.509637	0.509636	0.509636	0.509635	0.509635	0.509634	0.509634	0.489294	0.468955	0.448616	0.428278	0.407939	0.3876	0.367261	0.346922	0.326584	0.306245	0.285906	0.265568	0.245229	0.22489	0.204552	0.184213	0.163875	0.143536	0.123198	0.10286	0.0825211
Scrap preparation (post-consumer scrap only) (eEOL)	0.043693	0.043693	0.043693	0.043693	0.043693	0.043693	0.043693	0.043693	0.043693	0.0431579	0.0431579	0.0431579	0.0431579	0.0431579	0.0431579	0.0431579	0.0431579	0.0431579	0.0431579	0.0431579	0.0431579	0.0431579	0.0431579	0.0431579	0.0431579	0.0431579	0.0431579	0.0431579	0.0431579	0.0431579	0.0431579	0.0431579	0.0431579	0.0431579	0.0431579
LIBS (eT-EOL)	0.0003	0.0003	0.0003	0.0003	0.0003	0.0003	0.0003	0.00028724	0.000274479	0.000261719	0.000227102	0.000192484	0.000157867	0.00012325	8.86329e-05	7.1266e-05	5.3899e-05	3.6532e-05	1.9165e-05	1.79806e-06	1.79806e-06	1.79806e-06	1.79806e-06	1.79806e-06	1.79806e-06	1.79806e-06	1.79806e-06	1.79806e-06	1.79806e-06	1.79806e-06	1.79806e-06	1.79806e-06	1.79806e-06	1.79806e-06	1.79806e-06
Downstream processes	1.26106	1.26106	1.26106	1.26106	1.26106	1.26106	1.26106	1.26106	1.26106	1.2609	1.15917	1.05743	0.955699	0.853955	0.752225	0.688806	0.625371	0.561952	0.498533	0.435099	0.410248	0.385396	0.360545	0.335694	0.310843	0.285992	0.261141	0.23629	0.211439	0.186588	0.161737	0.136886	0.112035	0.0871841	0.0569307
Rolling (eR)	0.623	0.623	0.623	0.623	0.623	0.623	0.623	0.623	0.623	0.622727	0.576717	0.5307	0.484689	0.438673	0.392662	0.362658	0.332647	0.302643	0.272639	0.242629	0.228739	0.214848	0.200958	0.187068	0.173178	0.159288	0.145398	0.131508	0.117618	0.103728	0.0898377	0.0759476	0.0620576	0.0481675	0.0312578
Blanking & Stamping (eBS)	0.0681671	0.0681671	0.0681671	0.0681671	0.0681671	0.0681671	0.0681671	0.0681671	0.0681671	0.0681671	0.0591515	0.0501342	0.0411186	0.0321012	0.0230856	0.0185627	0.0140381	0.00951516	0.00499226	0.00046758	0.00046758	0.00046758	0.00046758	0.00046758	0.00046758	0.00046758	0.00046758	0.00046758	0.00046758	0.00046758	0.00046758	0.00046758	0.00046758	0.00046758	0.00046758
Assembly (eA)	0.251	0.251	0.251	0.251	0.251	0.251	0.251	0.251	0.251	0.251256	0.228124	0.204988	0.181855	0.158719	0.135587	0.122059	0.108527	0.0949995	0.0814717	0.06794	0.0640813	0.0602226	0.0563639	0.0525051	0.0486464	0.0447877	0.040929	0.0370703	0.0332115	0.0293528	0.0254941	0.0216354	0.0177766	0.0139179	0.00922035
[1]	Underlying data used in the 2024 Aluminum Association Report: Aluminum Association, & ICF. (2024). Pathways to Decarbonization: A North American Roadmap.

## Sheet: 4. Input to alloy flows
BAU 2025
	Primary virgin Al	Primary virgin Cu	Primary virgin Mg	Primary virgin Mn	Primary virgin Si	Primary virgin Fe	Primary virgin Zn	Secondary virgin Al	Secondary virgin Cu	Secondary virgin Mg	Secondary virgin Mn	Secondary virgin Si	Secondary virgin Fe	Secondary virgin Zn	Sheet Supply	Sheet 5xxx manufacturing scrap	Sheet Ford Low Mg manufacturing scrap	Sheet Ford High Mg manufacturing scrap	Sheet 6xxx 6005C manufacturing scrap	Sheet 6xxx 6016 manufacturing scrap	Sheet Ford Low Cu manufacturing scrap	Sheet Ford High Cu manufacturing scrap	Mixed ['Sheet 5xxx' 'Sheet 6xxx 6005C' 'Sheet 6xxx 6016'] manufacturing scrap	Row Total	Total Demand (adjusted for melt yield)
Sheet 5xxx	0	0	0	0	0	0	0	59.062	0.0344548	2.95629	0.207028	0	0.0294133	0.043103	0	0	2.97407	27.2308	0	0	0	0	3.35863	95.8958	91.101
Sheet Ford Low Mg	0	0	0	0	0	0	0	55.7315	0.0547185	2.03243	0.207917	0	0.107752	0.0395155	1.12088	0	21.1614	0	0	0	0	0	9.04207	89.4982	85.0233
Sheet Ford High Mg	0	0	0	0	0	0	0	33.7591	0.00646309	1.98189	0.108996	0	0.0205896	0.0227277	0	0	19.1924	0	0	0	0	0	1.15591	56.2481	53.4357
Sheet 6xxx 6005C	0	0	0	0	0	0	0	36.7136	0	0	0.0540051	0.124054	0.0103861	0	2.1622	0	0	0	0	0	5.3002	3.75609	8.65186	56.7724	53.9338
Sheet 6xxx 6016	56.0174	0	0.226529	0	0.528512	0	0	0	0	0	0	0	0	0	0	0	0	0	0	0	0	0	0	56.7724	53.9338
Sheet Ford Low Cu	0	0	0	0	0	0	0	80.8784	0.0508349	0	0	0.342054	0.0878361	0	5.28789	0	0	0	0	0	114.037	13.4716	32.3476	246.503	234.178
Sheet Ford High Cu	0	0	0	0	0	0	0	108.574	0.928951	0	0.240852	0.684867	0.233352	0	1.71347	0	0	0	0	0	0	116.017	46.8384	275.23	261.469
Column Total	56.0174	0	0.226529	0	0.528512	0	0	374.718	1.07542	6.9706	0.818798	1.15098	0.489329	0.105346	10.2844	0	43.3279	27.2308	0	0	119.337	133.244	101.394	876.92	833.074
BAU 2050
	Primary virgin Al	Primary virgin Cu	Primary virgin Mg	Primary virgin Mn	Primary virgin Si	Primary virgin Fe	Primary virgin Zn	Secondary virgin Al	Secondary virgin Cu	Secondary virgin Mg	Secondary virgin Mn	Secondary virgin Si	Secondary virgin Fe	Secondary virgin Zn	Sheet Supply	Sheet 5xxx manufacturing scrap	Sheet Ford Low Mg manufacturing scrap	Sheet Ford High Mg manufacturing scrap	Sheet 6xxx 6005C manufacturing scrap	Sheet 6xxx 6016 manufacturing scrap	Sheet Ford Low Cu manufacturing scrap	Sheet Ford High Cu manufacturing scrap	Mixed ['Sheet 5xxx' 'Sheet 6xxx 6005C' 'Sheet 6xxx 6016'] manufacturing scrap	Row Total	Total Demand (adjusted for melt yield)
Sheet 5xxx	0	0	0	0	0	0	0	92.1509	0.0530665	4.62143	0.322403	0	0.044728	0.0670169	0	0	5.70878	41.7204	0	0	0	0	4.94137	149.63	142.149
Sheet Ford Low Mg	0	0	0	0	0	0	0	70.6605	0.0994273	2.76639	0.297278	0	0.179889	0.0696967	0.474673	0	32.7409	0	0	0	0	0	29.8316	137.12	130.264
Sheet Ford High Mg	0	0	0	0	0	0	0	52.6878	0.011364	3.07525	0.171165	0	0.034129	0.0358613	0	0	27.933	0	0	0	0	0	2.22921	86.1778	81.8689
Sheet 6xxx 6005C	0	0	0	0	0	0	0	43.2861	0.0129964	0	0.0935469	0.162712	0	0	2.41664	0	0	0	0	0	39.6041	0	4.96476	90.5409	86.0138
Sheet 6xxx 6016	89.3367	0	0.36127	0	0.842873	0	0	0	0	0	0	0	0	0	0	0	0	0	0	0	0	0	0	90.5409	86.0138
Sheet Ford Low Cu	0	0	0	0	0	0	0	207.515	0.330002	0	0.0615201	1.05398	0.236716	0	12.9178	0	0	0	0	0	86.2601	0	69.2929	377.668	358.784
Sheet Ford High Cu	0	0	0	0	0	0	0	109.153	1.21347	0	0.320145	0.759976	0.272895	0	0	0	0	0	0	0	56.9723	204.144	48.8444	421.681	400.597
Column Total	89.3367	0	0.36127	0	0.842873	0	0	575.453	1.72032	10.4631	1.26606	1.97667	0.768358	0.172575	15.8091	0	66.3827	41.7204	0	0	182.836	204.144	160.104	1353.36	1285.69
Low GR 2050
	Primary virgin Al	Primary virgin Cu	Primary virgin Mg	Primary virgin Mn	Primary virgin Si	Primary virgin Fe	Primary virgin Zn	Secondary virgin Al	Secondary virgin Cu	Secondary virgin Mg	Secondary virgin Mn	Secondary virgin Si	Secondary virgin Fe	Secondary virgin Zn	Sheet Supply	Sheet 5xxx manufacturing scrap	Sheet Ford Low Mg manufacturing scrap	Sheet Ford High Mg manufacturing scrap	Sheet 6xxx 6005C manufacturing scrap	Sheet 6xxx 6016 manufacturing scrap	Sheet Ford Low Cu manufacturing scrap	Sheet Ford High Cu manufacturing scrap	Mixed ['Sheet 5xxx' 'Sheet 6xxx 6005C' 'Sheet 6xxx 6016'] manufacturing scrap	Row Total	Total Demand (adjusted for melt yield)
Sheet 5xxx	0	0	0	0	0	0	0	59.062	0.0344548	2.95629	0.207028	0	0.0294133	0.043103	0	0	2.97407	27.2308	0	0	0	0	3.35863	95.8958	91.101
Sheet Ford Low Mg	0	0	0	0	0	0	0	47.2238	0.0620566	1.81414	0.19383	0	0.114051	0.042994	0.555535	0	22.1445	0	0	0	0	0	17.3473	89.4982	85.0233
Sheet Ford High Mg	0	0	0	0	0	0	0	34.3892	0.00743542	2.00714	0.111744	0	0.0223236	0.0234176	0	0	18.2093	0	0	0	0	0	1.4775	56.2481	53.4357
Sheet 6xxx 6005C	0	0	0	0	0	0	0	27.1899	0.00818663	0	0.0586742	0.102363	0	0	1.51679	0	0	0	0	0	24.8072	0	3.0893	56.7724	53.9338
Sheet 6xxx 6016	56.0174	0	0.226529	0	0.528512	0	0	0	0	0	0	0	0	0	0	0	0	0	0	0	0	0	0	56.7724	53.9338
Sheet Ford Low Cu	0	0	0	0	0	0	0	121.46	0.0624381	0	0	0.592324	0.119288	0	8.39296	0	0	0	0	0	50.1231	27.2435	38.5092	246.503	234.178
Sheet Ford High Cu	0	0	0	0	0	0	0	85.2111	0.943998	0	0.249172	0.593857	0.211968	0	0	0	0	0	0	0	44.4067	106.001	37.6124	275.23	261.469
Column Total	56.0174	0	0.226529	0	0.528512	0	0	374.536	1.11857	6.77756	0.820448	1.28854	0.497044	0.109515	10.4653	0	43.3279	27.2308	0	0	119.337	133.244	101.394	876.92	833.074
High GR 2050
	Primary virgin Al	Primary virgin Cu	Primary virgin Mg	Primary virgin Mn	Primary virgin Si	Primary virgin Fe	Primary virgin Zn	Secondary virgin Al	Secondary virgin Cu	Secondary virgin Mg	Secondary virgin Mn	Secondary virgin Si	Secondary virgin Fe	Secondary virgin Zn	Sheet Supply	Sheet 5xxx manufacturing scrap	Sheet Ford Low Mg manufacturing scrap	Sheet Ford High Mg manufacturing scrap	Sheet 6xxx 6005C manufacturing scrap	Sheet 6xxx 6016 manufacturing scrap	Sheet Ford Low Cu manufacturing scrap	Sheet Ford High Cu manufacturing scrap	Mixed ['Sheet 5xxx' 'Sheet 6xxx 6005C' 'Sheet 6xxx 6016'] manufacturing scrap	Row Total	Total Demand (adjusted for melt yield)
Sheet 5xxx	0	0	0	0	0	0	0	109.369	0.0627597	5.48782	0.382449	0	0.0527129	0.0794642	0	0	7.11959	49.2675	0	0	0	0	5.77001	177.592	168.712
Sheet Ford Low Mg	0	0	0	0	0	0	0	82.8784	0.118865	3.26259	0.351155	0	0.214137	0.0835834	0.43434	0	38.2748	0	0	0	0	0	36.307	161.925	153.829
Sheet Ford High Mg	0	0	0	0	0	0	0	62.2188	0.0134111	3.63159	0.202117	0	0.0402801	0.0423432	0	0	32.9967	0	0	0	0	0	2.62173	101.767	96.6787
Sheet 6xxx 6005C	0	0	0	0	0	0	0	51.6534	0.0154967	0	0.111675	0.194083	0	0	2.88441	0	0	0	0	0	47.2958	0	5.93961	108.094	102.69
Sheet 6xxx 6016	106.657	0	0.431311	0	1.00628	0	0	0	0	0	0	0	0	0	0	0	0	0	0	0	0	0	0	108.094	102.69
Sheet Ford Low Cu	0	0	0	0	0	0	0	245.193	0.390199	0	0.0726715	1.24469	0.280088	0	15.2742	0	0	0	0	0	101.372	0	82.1591	445.986	423.687
Sheet Ford High Cu	0	0	0	0	0	0	0	128.776	1.43298	0	0.378008	0.896358	0.322396	0	0	0	0	0	0	0	67.2428	241.073	57.8396	497.961	473.063
Column Total	106.657	0	0.431311	0	1.00628	0	0	680.089	2.03371	12.382	1.49808	2.33513	0.909614	0.205391	18.5929	0	78.3911	49.2675	0	0	215.911	241.073	190.637	1601.42	1521.35
Greene 2050
	Primary virgin Al	Primary virgin Cu	Primary virgin Mg	Primary virgin Mn	Primary virgin Si	Primary virgin Fe	Primary virgin Zn	Secondary virgin Al	Secondary virgin Cu	Secondary virgin Mg	Secondary virgin Mn	Secondary virgin Si	Secondary virgin Fe	Secondary virgin Zn	Sheet Supply	Sheet 5xxx manufacturing scrap	Sheet Ford Low Mg manufacturing scrap	Sheet Ford High Mg manufacturing scrap	Sheet 6xxx 6005C manufacturing scrap	Sheet 6xxx 6016 manufacturing scrap	Sheet Ford Low Cu manufacturing scrap	Sheet Ford High Cu manufacturing scrap	Mixed ['Sheet 5xxx' 'Sheet 6xxx 6005C' 'Sheet 6xxx 6016'] manufacturing scrap	Row Total	Total Demand (adjusted for melt yield)
Sheet 5xxx	0	0	0	0	0	0	0	92.1509	0.0530665	4.62143	0.322403	0	0.044728	0.0670169	0	0	5.70878	41.7204	0	0	0	0	4.94137	149.63	142.149
Sheet Ford Low Mg	0	0	0	0	0	0	0	70.6605	0.0994273	2.76639	0.297278	0	0.179889	0.0696967	0.474673	0	32.7409	0	0	0	0	0	29.8316	137.12	130.264
Sheet Ford High Mg	0	0	0	0	0	0	0	52.6878	0.011364	3.07525	0.171165	0	0.034129	0.0358613	0	0	27.933	0	0	0	0	0	2.22921	86.1778	81.8689
Sheet 6xxx 6005C	0	0	0	0	0	0	0	43.2861	0.0129964	0	0.0935469	0.162712	0	0	2.41664	0	0	0	0	0	39.6041	0	4.96476	90.5409	86.0138
Sheet 6xxx 6016	89.3367	0	0.36127	0	0.842873	0	0	0	0	0	0	0	0	0	0	0	0	0	0	0	0	0	0	90.5409	86.0138
Sheet Ford Low Cu	0	0	0	0	0	0	0	207.515	0.330002	0	0.0615201	1.05398	0.236716	0	12.9178	0	0	0	0	0	86.2601	0	69.2929	377.668	358.784
Sheet Ford High Cu	0	0	0	0	0	0	0	109.153	1.21347	0	0.320145	0.759976	0.272895	0	0	0	0	0	0	0	56.9723	204.144	48.8444	421.681	400.597
Column Total	89.3367	0	0.36127	0	0.842873	0	0	575.453	1.72032	10.4631	1.26606	1.97667	0.768358	0.172575	15.8091	0	66.3827	41.7204	0	0	182.836	204.144	160.104	1353.36	1285.69
P0610 2050
	Primary virgin Al	Primary virgin Cu	Primary virgin Mg	Primary virgin Mn	Primary virgin Si	Primary virgin Fe	Primary virgin Zn	Secondary virgin Al	Secondary virgin Cu	Secondary virgin Mg	Secondary virgin Mn	Secondary virgin Si	Secondary virgin Fe	Secondary virgin Zn	Sheet Supply	Sheet 5xxx manufacturing scrap	Sheet Ford Low Mg manufacturing scrap	Sheet Ford High Mg manufacturing scrap	Sheet 6xxx 6005C manufacturing scrap	Sheet 6xxx 6016 manufacturing scrap	Sheet Ford Low Cu manufacturing scrap	Sheet Ford High Cu manufacturing scrap	Mixed ['Sheet 5xxx' 'Sheet 6xxx 6005C' 'Sheet 6xxx 6016'] manufacturing scrap	Row Total	Total Demand (adjusted for melt yield)
Sheet 5xxx	0	0	0	0	0	0	0	91.4026	0.0575412	4.66782	0.332204	0	0.121561	0.0700873	0	0	0	41.7204	0	0	0	0	11.2579	149.63	142.149
Sheet Ford Low Mg	0	0	0	0	0	0	0	70.0405	0.0789544	2.62507	0.278031	0	0.203808	0.0527778	1.70759	0	42.2514	0	0	0	0	0	19.8822	137.12	130.264
Sheet Ford High Mg	0	0	0	0	0	0	0	52.5903	0.0144506	3.11531	0.178254	0	0.0792477	0.0379913	0	0	24.1313	0	0	0	0	0	6.03096	86.1778	81.8689
Sheet 6xxx 6005C	0	0	0	0	0	0	0	35.0313	0	0	0.0913384	0.127946	0.015166	0	1.90424	0	0	0	0	0	51.1736	0	2.19723	90.5409	86.0138
Sheet 6xxx 6016	89.3197	0	0.360377	0	0.860749	0	0	0	0	0	0	0	0	0	0	0	0	0	0	0	0	0	0	90.5409	86.0138
Sheet Ford Low Cu	0	0	0	0	0	0	0	215.678	0.343791	0	0.0654102	1.13953	0.397376	0	13.435	0	0	0	0	0	74.6577	0	71.9505	377.668	358.784
Sheet Ford High Cu	0	0	0	0	0	0	0	109.08	1.21376	0	0.320867	0.781902	0.349356	0	0	0	0	0	0	0	57.005	204.144	48.7854	421.681	400.597
Column Total	89.3197	0	0.360377	0	0.860749	0	0	573.823	1.7085	10.4082	1.26611	2.04938	1.16652	0.160856	17.0469	0	66.3827	41.7204	0	0	182.836	204.144	160.104	1353.36	1285.69
P0000 2050
	Primary virgin Al	Primary virgin Cu	Primary virgin Mg	Primary virgin Mn	Primary virgin Si	Primary virgin Fe	Primary virgin Zn	Secondary virgin Al	Secondary virgin Cu	Secondary virgin Mg	Secondary virgin Mn	Secondary virgin Si	Secondary virgin Fe	Secondary virgin Zn	Sheet Supply	Sheet 5xxx manufacturing scrap	Sheet Ford Low Mg manufacturing scrap	Sheet Ford High Mg manufacturing scrap	Sheet 6xxx 6005C manufacturing scrap	Sheet 6xxx 6016 manufacturing scrap	Sheet Ford Low Cu manufacturing scrap	Sheet Ford High Cu manufacturing scrap	Mixed ['Sheet 5xxx' 'Sheet 6xxx 6005C' 'Sheet 6xxx 6016'] manufacturing scrap	Row Total	Total Demand (adjusted for melt yield)
Sheet 5xxx	0	0	0	0	0	0	0	84.7799	0	4.39846	0.118691	0	0	0	0	0	49.9315	0	0	0	0	0	10.4015	149.63	142.149
Sheet Ford Low Mg	0	0	0	0	0	0	0	85.0545	0.0904301	3.2349	0.3466	0	0.34066	0.0611214	3.00303	0	16.4512	0	0	0	0	0	28.5379	137.12	130.264
Sheet Ford High Mg	0	0	0	0	0	0	0	40.6408	0.00548251	2.0288	0.133607	0	0.103374	0.0165857	1.52876	0	0	41.7204	0	0	0	0	0	86.1778	81.8689
Sheet 6xxx 6005C	0	0	0	0	0	0	0	36.0267	0	0	0	0.0286984	0	0	2.06666	0	0	0	0	0	50.1555	0	2.26324	90.5409	86.0138
Sheet 6xxx 6016	89.2733	0	0.362163	0	0.905409	0	0	0	0	0	0	0	0	0	0	0	0	0	0	0	0	0	0	90.5409	86.0138
Sheet Ford Low Cu	0	0	0	0	0	0	0	220.469	0.344212	0	0.0669401	1.25469	0.623976	0	14.4526	0	0	0	0	0	68.0106	0	72.4456	377.668	358.784
Sheet Ford High Cu	0	0	0	0	0	0	0	103.652	1.20171	0	0.319257	0.795464	0.44174	0	0	0	0	0	0	0	64.6703	204.144	46.456	421.681	400.597
Column Total	89.2733	0	0.362163	0	0.905409	0	0	570.623	1.64184	9.66216	0.985095	2.07886	1.50975	0.0777072	21.0511	0	66.3827	41.7204	0	0	182.836	204.144	160.104	1353.36	1285.69
HRC 2050
	Primary virgin Al	Primary virgin Cu	Primary virgin Mg	Primary virgin Mn	Primary virgin Si	Primary virgin Fe	Primary virgin Zn	Secondary virgin Al	Secondary virgin Cu	Secondary virgin Mg	Secondary virgin Mn	Secondary virgin Si	Secondary virgin Fe	Secondary virgin Zn	Sheet Supply	Sheet 5xxx manufacturing scrap	Sheet Ford Low Mg manufacturing scrap	Sheet Ford High Mg manufacturing scrap	Sheet 6xxx 6005C manufacturing scrap	Sheet 6xxx 6016 manufacturing scrap	Sheet Ford Low Cu manufacturing scrap	Sheet Ford High Cu manufacturing scrap	Sheet HRC 5xxx Alloy 2 manufacturing scrap	Sheet HRC 6xxx Alloy 2 manufacturing scrap	Mixed ['Sheet 5xxx' 'Sheet 6xxx 6005C' 'Sheet 6xxx 6016'] manufacturing scrap	Row Total	Total Demand (adjusted for melt yield)
Sheet 5xxx	0	0	0	0	0	0	0	0	0	0	0	0	0	0	0	0	0	0	0	0	0	0	0	0	0	0	0
Sheet Ford Low Mg	0	0	0	0	0	0	0	0	0	0	0	0	0	0	0	0	0	0	0	0	0	0	0	0	0	0	0
Sheet Ford High Mg	0	0	0	0	0	0	0	0	0	0	0	0	0	0	0	0	0	0	0	0	0	0	0	0	0	0	0
Sheet 6xxx 6005C	0	0	0	0	0	0	0	58.3532	0	0.171657	0.0941424	0.232287	0.000253697	0	2.52396	0	0	0	0	0	24.2243	0	0	4.94103	0	90.5409	86.0138
Sheet 6xxx 6016	0	0	0	0	0	0	0	57.6553	0.0052573	0.287992	0.0697229	0.79352	0.0397511	0	0	0	0	0	0	0	7.3458	0	0	0	24.3435	90.5409	86.0138
Sheet Ford Low Cu	0	0	0	0	0	0	0	242.412	0.297478	1.32251	0.143566	1.13941	0.168506	0	12.8195	0	0	0	0	0	119.364	0	0	0	0	377.668	358.784
Sheet Ford High Cu	0	0	0	0	0	0	0	0	0	0	0	0	0	0	0	0	0	0	0	0	0	0	0	0	0	0	0
Sheet HRC 5xxx Alloy 2	0	0	0	0	0	0	0	174.451	0.463644	6.03488	0.547441	0	0.324524	0.281773	10.2832	0	0	0	0	0	0	0	180.542	0	0	372.928	354.282
Sheet HRC 6xxx Alloy 2	0	0	0	0	0	0	0	92.5514	1.3494	0.20773	0.627526	0.0721166	0.313372	0	32.1321	0	0	0	0	0	31.9022	0	0	199.203	63.3218	421.681	400.597
Column Total	0	0	0	0	0	0	0	625.423	2.11578	8.02477	1.4824	2.23734	0.846408	0.281773	57.7587	0	0	0	0	0	182.836	0	180.542	204.144	87.6653	1353.36	1285.69
No FCC 2050
	Primary virgin Al	Primary virgin Cu	Primary virgin Mg	Primary virgin Mn	Primary virgin Si	Primary virgin Fe	Primary virgin Zn	Secondary virgin Al	Secondary virgin Cu	Secondary virgin Mg	Secondary virgin Mn	Secondary virgin Si	Secondary virgin Fe	Secondary virgin Zn	Sheet Supply	Sheet 5xxx manufacturing scrap	Sheet Ford Low Mg manufacturing scrap	Sheet Ford High Mg manufacturing scrap	Sheet 6xxx 6005C manufacturing scrap	Sheet 6xxx 6016 manufacturing scrap	Sheet Ford Low Cu manufacturing scrap	Sheet Ford High Cu manufacturing scrap	Mixed ['Sheet 5xxx' 'Sheet 6xxx 6005C' 'Sheet 6xxx 6016'] manufacturing scrap	Row Total	Total Demand (adjusted for melt yield)
Sheet 5xxx	0	0	0	0	0	0	0	105.68	0.0401585	5.62985	0.353142	0	0.0284836	0.0713091	0	0	37.827	0	0	0	0	0	0	149.63	142.149
Sheet Ford Low Mg	0	0	0	0	0	0	0	56.2014	0.0652057	1.38506	0.211568	0	0.126794	0.0275291	2.8391	0	28.5557	41.7204	0	0	0	0	5.98759	137.12	130.264
Sheet Ford High Mg	0	0	0	0	0	0	0	70.6806	0.0390181	3.79683	0.249467	0	0.0833501	0.055493	0	0	0	0	0	0	0	0	11.2731	86.1778	81.8689
Sheet 6xxx 6005C	0	0	0	0	0	0	0	71.4886	0.0578458	0	0.101908	0.305955	0.0321712	0	4.17226	0	0	0	0	0	0	0	14.3821	90.5409	86.0138
Sheet 6xxx 6016	0	0	0	0	0	0	0	69.5126	0.0177458	0	0.0593621	0.935224	0.0408181	0	0.233617	0	0	0	0	0	0	0	19.7415	90.5409	86.0138
Sheet Ford Low Cu	0	0	0	0	0	0	0	138.741	0.220635	0	0.0411315	0.704678	0.158265	0	8.63669	0	0	0	0	0	182.836	0	46.3283	377.668	358.784
Sheet Ford High Cu	0	0	0	0	0	0	0	149.724	1.27799	0	0.332173	0.966037	0.319175	0	2.52553	0	0	0	0	0	0	204.144	62.3917	421.681	400.597
Column Total	0	0	0	0	0	0	0	662.029	1.71859	10.8117	1.34875	2.91189	0.789058	0.154331	18.4072	0	66.3827	41.7204	0	0	182.836	204.144	160.104	1353.36	1285.69
Separate manufacturing scrap 2050
	Primary virgin Al	Primary virgin Cu	Primary virgin Mg	Primary virgin Mn	Primary virgin Si	Primary virgin Fe	Primary virgin Zn	Secondary virgin Al	Secondary virgin Cu	Secondary virgin Mg	Secondary virgin Mn	Secondary virgin Si	Secondary virgin Fe	Secondary virgin Zn	Sheet Supply	Sheet 5xxx manufacturing scrap	Sheet Ford Low Mg manufacturing scrap	Sheet Ford High Mg manufacturing scrap	Sheet 6xxx 6005C manufacturing scrap	Sheet 6xxx 6016 manufacturing scrap	Sheet Ford Low Cu manufacturing scrap	Sheet Ford High Cu manufacturing scrap	Row Total	Total Demand (adjusted for melt yield)
Sheet 5xxx	0	0	0	0	0	0	0	39.4262	0.0216572	2.30434	0.159554	0	0.0307354	0.0395783	0	39.9254	26.0023	41.7204	0	0	0	0	149.63	142.149
Sheet Ford Low Mg	0	0	0	0	0	0	0	85.9364	0.0744495	2.56137	0.318964	0	0.197849	0.039187	5.07257	32.5136	10.406	0	0	0	0	0	137.12	130.264
Sheet Ford High Mg	0	0	0	0	0	0	0	52.7283	0.00779589	3.05022	0.167296	0	0.0289336	0.0329773	0.187831	0	29.9744	0	0	0	0	0	86.1778	81.8689
Sheet 6xxx 6005C	0	0	0	0	0	0	0	58.3239	0.0260514	0.163156	0.106851	0.227763	0.00382782	0	3.07261	0	0	0	0	0	28.6167	0	90.5409	86.0138
Sheet 6xxx 6016	0	0	0	0	0	0	0	57.7432	0.0155658	0.288167	0.0728668	0.682991	0.0487525	0	0.606654	0	0	0	0	31.0826	0	0	90.5409	86.0138
Sheet Ford Low Cu	0	0	0	0	0	0	0	209.701	0.257336	1.14405	0.124193	0.985661	0.145768	0	11.0896	0	0	0	0	0	154.22	0	377.668	358.784
Sheet Ford High Cu	0	0	0	0	0	0	0	154.13	1.26655	1.12211	0.386686	0.86154	0.317228	0	2.87018	0	0	0	43.8326	12.75	0	204.144	421.681	400.597
Column Total	0	0	0	0	0	0	0	657.989	1.66941	10.6334	1.33641	2.75795	0.773095	0.111743	22.8995	72.4389	66.3827	41.7204	43.8326	43.8326	182.836	204.144	1353.36	1285.69
Shifting 5xxx to 6xxx demand 2050
	Primary virgin Al	Primary virgin Cu	Primary virgin Mg	Primary virgin Mn	Primary virgin Si	Primary virgin Fe	Primary virgin Zn	Secondary virgin Al	Secondary virgin Cu	Secondary virgin Mg	Secondary virgin Mn	Secondary virgin Si	Secondary virgin Fe	Secondary virgin Zn	Sheet Supply	Sheet 5xxx manufacturing scrap	Sheet Ford Low Mg manufacturing scrap	Sheet Ford High Mg manufacturing scrap	Sheet 6xxx 6005C manufacturing scrap	Sheet 6xxx 6016 manufacturing scrap	Sheet Ford Low Cu manufacturing scrap	Sheet Ford High Cu manufacturing scrap	Mixed ['Sheet 5xxx' 'Sheet 6xxx 6005C' 'Sheet 6xxx 6016'] manufacturing scrap	Row Total	Total Demand (adjusted for melt yield)
Sheet 5xxx	0	0	0	0	0	0	0	0	0	0	0	0	0	0	0	0	0	0	0	0	0	0	0	0	0
Sheet Ford Low Mg	0	0	0	0	0	0	0	0	0	0	0	0	0	0	0	0	0	0	0	0	0	0	0	0	0
Sheet Ford High Mg	0	0	0	0	0	0	0	0	0	0	0	0	0	0	0	0	0	0	0	0	0	0	0	0	0
Sheet 6xxx 6005C	0	0	0	0	0	0	0	82.2371	0.0594905	0.433429	0.181443	0	0.0880119	0	6.88907	0	0	0	0	0	0	0	75.4674	165.356	157.088
Sheet 6xxx 6016	0	0	0	0	0	0	0	76.1873	0	0.417106	0.106376	1.2036	0.106023	0	0.103542	0	0	0	0	0	0	2.59514	84.6368	165.356	157.088
Sheet Ford Low Cu	0	0	0	0	0	0	0	243.446	0	1.63027	0.0773931	0.890834	0.126848	0	13.7693	0	0	0	0	0	290.939	50.0851	0	600.966	570.917
Sheet Ford High Cu	0	0	0	0	0	0	0	259.977	1.57303	1.78704	0.525757	1.38956	0.340444	0	4.62441	0	0	0	0	0	0	151.464	0	421.681	400.597
Column Total	0	0	0	0	0	0	0	661.847	1.63252	4.26784	0.890969	3.48399	0.661327	0	25.3863	0	0	0	0	0	290.939	204.144	160.104	1353.36	1285.69
LIBS 2050
	Primary virgin Al	Primary virgin Cu	Primary virgin Mg	Primary virgin Mn	Primary virgin Si	Primary virgin Fe	Primary virgin Zn	Secondary virgin Al	Secondary virgin Cu	Secondary virgin Mg	Secondary virgin Mn	Secondary virgin Si	Secondary virgin Fe	Secondary virgin Zn	All Twitch	Sheet 5xxx manufacturing scrap	Sheet Ford Low Mg manufacturing scrap	Sheet Ford High Mg manufacturing scrap	Sheet 6xxx 6005C manufacturing scrap	Sheet 6xxx 6016 manufacturing scrap	Sheet Ford Low Cu manufacturing scrap	Sheet Ford High Cu manufacturing scrap	Mixed ['Sheet 5xxx' 'Sheet 6xxx 6005C' 'Sheet 6xxx 6016'] manufacturing scrap	Separated stream (0, 0)	Separated stream (0, 1)	Separated stream (0, 2)	Row Total	Total Demand (adjusted for melt yield)
Sheet 5xxx	0	0	0	0	0	0	0	92.1509	0.0530665	4.62143	0.322403	0	0.044728	0.0670169	0	0	5.70878	41.7204	0	0	0	0	4.94137	0	0	0	149.63	142.149
Sheet Ford Low Mg	0	0	0	0	0	0	0	67.235	0.103337	2.69639	0.292594	0	0.183928	0.0733592	0	0	32.7409	0	0	0	0	0	33.7948	0	0	0	137.12	130.264
Sheet Ford High Mg	0	0	0	0	0	0	0	52.6878	0.011364	3.07525	0.171165	0	0.034129	0.0358613	0	0	27.933	0	0	0	0	0	2.22921	0	0	0	86.1778	81.8689
Sheet 6xxx 6005C	0	0	0	0	0	0	0	45.3151	0	0	0.0755076	0.259515	0.003348	0.022158	0	0	0	0	0	0	0	0	14.37	0	30.4953	0	90.5409	86.0138
Sheet 6xxx 6016	89.3367	0	0.36127	0	0.842873	0	0	0	0	0	0	0	0	0	0	0	0	0	0	0	0	0	0	0	0	0	90.5409	86.0138
Sheet Ford Low Cu	0	0	0	0	0	0	0	87.2012	0	0.631644	0	0.551076	0.0296073	0.0345909	0	0	0	0	0	0	182.836	0	10.0726	0	96.3104	0	377.668	358.784
Sheet Ford High Cu	0	0	0	0	0	0	0	114.616	1.15731	0	0.293578	0.803177	0.261042	0	0	0	0	0	0	0	0	204.144	56.1158	0	44.2892	0	421.681	400.597
Column Total	89.3367	0	0.36127	0	0.842873	0	0	459.206	1.32508	11.0247	1.15525	1.61377	0.556783	0.232986	0	0	66.3827	41.7204	0	0	182.836	204.144	121.524	0	171.095	0	1353.36	1285.69
Castings removal 2050
	Primary virgin Al	Primary virgin Cu	Primary virgin Mg	Primary virgin Mn	Primary virgin Si	Primary virgin Fe	Primary virgin Zn	Secondary virgin Al	Secondary virgin Cu	Secondary virgin Mg	Secondary virgin Mn	Secondary virgin Si	Secondary virgin Fe	Secondary virgin Zn	Sheet Supply	Sheet 5xxx manufacturing scrap	Sheet Ford Low Mg manufacturing scrap	Sheet Ford High Mg manufacturing scrap	Sheet 6xxx 6005C manufacturing scrap	Sheet 6xxx 6016 manufacturing scrap	Sheet Ford Low Cu manufacturing scrap	Sheet Ford High Cu manufacturing scrap	Mixed ['Sheet 5xxx' 'Sheet 6xxx 6005C' 'Sheet 6xxx 6016'] manufacturing scrap	Row Total	Total Demand (adjusted for melt yield)
Sheet 5xxx	0	0	0	0	0	0	0	82.32	0.0379569	4.22717	0.279621	0	0.0178346	0.0562906	0	0	20.9708	41.7204	0	0	0	0	0	149.63	142.149
Sheet Ford Low Mg	0	0	0	0	0	0	0	80.14	0.110679	3.18901	0.338396	0	0.201572	0.0771417	2.66268	0	17.4789	0	0	0	0	0	32.9219	137.12	130.264
Sheet Ford High Mg	0	0	0	0	0	0	0	52.6878	0.011364	3.07525	0.171165	0	0.034129	0.0358613	0	0	27.933	0	0	0	0	0	2.22921	86.1778	81.8689
Sheet 6xxx 6005C	0	0	0	0	0	0	0	55.9042	0	0	0.0704864	0.28806	0.00547154	0	12.5068	0	0	0	0	0	0	9.66594	12.0999	90.5409	86.0138
Sheet 6xxx 6016	89.3367	0	0.36127	0	0.842873	0	0	0	0	0	0	0	0	0	0	0	0	0	0	0	0	0	0	90.5409	86.0138
Sheet Ford Low Cu	0	0	0	0	0	0	0	119.742	0.21838	0	0.00568776	0.757924	0.131638	0	26.605	0	0	0	0	0	182.836	0	47.3708	377.668	358.784
Sheet Ford High Cu	0	0	0	0	0	0	0	150.574	1.33408	0	0.336107	1.02522	0.325225	0	8.12549	0	0	0	0	0	0	194.478	65.4823	421.681	400.597
Column Total	89.3367	0	0.36127	0	0.842873	0	0	541.368	1.71246	10.4914	1.20146	2.07121	0.71587	0.169294	49.9	0	66.3827	41.7204	0	0	182.836	204.144	160.104	1353.36	1285.69
Isolated Ford shredding 2050
	Primary virgin Al	Primary virgin Cu	Primary virgin Mg	Primary virgin Mn	Primary virgin Si	Primary virgin Fe	Primary virgin Zn	Secondary virgin Al	Secondary virgin Cu	Secondary virgin Mg	Secondary virgin Mn	Secondary virgin Si	Secondary virgin Fe	Secondary virgin Zn	ABS Scrap	Ford ABS	Sheet 5xxx manufacturing scrap	Sheet Ford Low Mg manufacturing scrap	Sheet Ford High Mg manufacturing scrap	Sheet 6xxx 6005C manufacturing scrap	Sheet 6xxx 6016 manufacturing scrap	Sheet Ford Low Cu manufacturing scrap	Sheet Ford High Cu manufacturing scrap	Mixed ['Sheet 5xxx' 'Sheet 6xxx 6005C' 'Sheet 6xxx 6016'] manufacturing scrap	Row Total	Total Demand (adjusted for melt yield)
Sheet 5xxx	0	0	0	0	0	0	0	92.0164	0.0388707	4.8094	0.310138	0	0.0222548	0.0625245	0	0	0	27.9675	24.403	0	0	0	0	0	149.63	142.149
Sheet Ford Low Mg	0	0	0	0	0	0	0	85.0635	0.11598	3.30299	0.353734	0	0.211128	0.0809074	0.763589	0	0	13.6177	0	0	0	0	0	33.6108	137.12	130.264
Sheet Ford High Mg	0	0	0	0	0	0	0	40.5043	0.00662759	2.39328	0.129825	0	0.022905	0.0269137	0	0	0	24.7975	17.3173	0	0	0	0	0.979082	86.1778	81.8689
Sheet 6xxx 6005C	0	0	0	0	0	0	0	58.5621	0.0155281	0	0.0894251	0.172298	0.0121954	0	0	5.46673	0	0	0	0	0	14.8087	0	11.4138	90.5409	86.0138
Sheet 6xxx 6016	89.3367	0	0.36127	0	0.842873	0	0	0	0	0	0	0	0	0	0	0	0	0	0	0	0	0	0	0	90.5409	86.0138
Sheet Ford Low Cu	0	0	0	0	0	0	0	181.853	0.216042	0	0.0248332	0.695053	0.189862	0	0	18.3769	0	0	0	0	0	111.055	0	65.2561	377.668	358.784
Sheet Ford High Cu	0	0	0	0	0	0	0	109.153	1.21347	0	0.320145	0.759976	0.272895	0	0	0	0	0	0	0	0	56.9723	204.144	48.8444	421.681	400.597
Column Total	89.3367	0	0.36127	0	0.842873	0	0	567.153	1.60652	10.5057	1.2281	1.62733	0.731241	0.170346	0.763589	23.8436	0	66.3827	41.7204	0	0	182.836	204.144	160.104	1353.36	1285.69
HRC + 5xxx -> 6xxx 2050
	Primary virgin Al	Primary virgin Cu	Primary virgin Mg	Primary virgin Mn	Primary virgin Si	Primary virgin Fe	Primary virgin Zn	Secondary virgin Al	Secondary virgin Cu	Secondary virgin Mg	Secondary virgin Mn	Secondary virgin Si	Secondary virgin Fe	Secondary virgin Zn	Sheet Supply	Sheet 5xxx manufacturing scrap	Sheet Ford Low Mg manufacturing scrap	Sheet Ford High Mg manufacturing scrap	Sheet 6xxx 6005C manufacturing scrap	Sheet 6xxx 6016 manufacturing scrap	Sheet Ford Low Cu manufacturing scrap	Sheet Ford High Cu manufacturing scrap	Sheet HRC 5xxx Alloy 2 manufacturing scrap	Sheet HRC 6xxx Alloy 2 manufacturing scrap	Mixed ['Sheet 5xxx' 'Sheet 6xxx 6005C' 'Sheet 6xxx 6016'] manufacturing scrap	Row Total	Total Demand (adjusted for melt yield)
Sheet 5xxx	0	0	0	0	0	0	0	0	0	0	0	0	0	0	0	0	0	0	0	0	0	0	0	0	0	0	0
Sheet Ford Low Mg	0	0	0	0	0	0	0	0	0	0	0	0	0	0	0	0	0	0	0	0	0	0	0	0	0	0	0
Sheet Ford High Mg	0	0	0	0	0	0	0	0	0	0	0	0	0	0	0	0	0	0	0	0	0	0	0	0	0	0	0
Sheet 6xxx 6005C	0	0	0	0	0	0	0	106.492	0.023423	0.432594	0.195901	0.334952	0.00232754	0	5.32062	0	0	0	0	0	52.5539	0	0	0	0	165.356	157.088
Sheet 6xxx 6016	0	0	0	0	0	0	0	105.282	0.0199282	0.553979	0.127341	1.40811	0.0899877	0	0.476746	0	0	0	0	0	0	0	0	0	57.3978	165.356	157.088
Sheet Ford Low Cu	0	0	0	0	0	0	0	284.719	0.366738	2.13815	0.170811	0.795298	0.323558	0	18.0697	0	0	0	0	0	191.676	0	0	0	102.706	600.966	570.917
Sheet Ford High Cu	0	0	0	0	0	0	0	0	0	0	0	0	0	0	0	0	0	0	0	0	0	0	0	0	0	0	0
Sheet HRC 5xxx Alloy 2	0	0	0	0	0	0	0	0	0	0	0	0	0	0	0	0	0	0	0	0	0	0	0	0	0	0	0
Sheet HRC 6xxx Alloy 2	0	0	0	0	0	0	0	137.748	1.18209	1.14109	0.646182	0	0.227915	0	29.8818	0	0	0	0	0	46.7093	0	0	204.144	0	421.681	400.597
Column Total	0	0	0	0	0	0	0	634.241	1.59218	4.26581	1.14024	2.53836	0.643788	0	53.7489	0	0	0	0	0	290.939	0	0	204.144	160.104	1353.36	1285.69
HRC + LIBS 2050
	Primary virgin Al	Primary virgin Cu	Primary virgin Mg	Primary virgin Mn	Primary virgin Si	Primary virgin Fe	Primary virgin Zn	Secondary virgin Al	Secondary virgin Cu	Secondary virgin Mg	Secondary virgin Mn	Secondary virgin Si	Secondary virgin Fe	Secondary virgin Zn	All Twitch	Sheet 5xxx manufacturing scrap	Sheet Ford Low Mg manufacturing scrap	Sheet Ford High Mg manufacturing scrap	Sheet 6xxx 6005C manufacturing scrap	Sheet 6xxx 6016 manufacturing scrap	Sheet Ford Low Cu manufacturing scrap	Sheet Ford High Cu manufacturing scrap	Sheet HRC 5xxx Alloy 2 manufacturing scrap	Sheet HRC 6xxx Alloy 2 manufacturing scrap	Mixed ['Sheet 5xxx' 'Sheet 6xxx 6005C' 'Sheet 6xxx 6016'] manufacturing scrap	Separated stream (0, 0)	Separated stream (0, 1)	Separated stream (0, 2)	Row Total	Total Demand (adjusted for melt yield)
Sheet 5xxx	0	0	0	0	0	0	0	0	0	0	0	0	0	0	0	0	0	0	0	0	0	0	0	0	0	0	0	0	0	0
Sheet Ford Low Mg	0	0	0	0	0	0	0	0	0	0	0	0	0	0	0	0	0	0	0	0	0	0	0	0	0	0	0	0	0	0
Sheet Ford High Mg	0	0	0	0	0	0	0	0	0	0	0	0	0	0	0	0	0	0	0	0	0	0	0	0	0	0	0	0	0	0
Sheet 6xxx 6005C	0	0	0	0	0	0	0	34.659	0	0	0.079668	0	0.0160866	0	1.47089	0	0	0	0	0	0	0	0	0	32.0302	5.96458	15.2852	1.03518	90.5409	86.0138
Sheet 6xxx 6016	0	0	0	0	0	0	0	36.53	0.00708414	0.208288	0.0570895	0.61924	0.0645998	0	0	0	0	0	0	0	0	0	0	0	53.0546	0	0	0	90.5409	86.0138
Sheet Ford Low Cu	0	0	0	0	0	0	0	99.9887	0.041492	0.0432901	0	0.483879	0.00775281	0	0	0	0	0	0	0	182.836	0	0	0	2.58046	37.122	53.6976	0.866051	377.668	358.784
Sheet Ford High Cu	0	0	0	0	0	0	0	0	0	0	0	0	0	0	0	0	0	0	0	0	0	0	0	0	0	0	0	0	0	0
Sheet HRC 5xxx Alloy 2	0	0	0	0	0	0	0	141.159	0.46314	5.24374	0.498265	0	0.271187	0.313883	0	0	0	0	0	0	0	0	180.542	0	0	44.4365	0	0	372.928	354.282
Sheet HRC 6xxx Alloy 2	0	0	0	0	0	0	0	0	0.893687	0	0.461806	0	0.0538565	0.0442681	16.0237	0	0	0	0	0	0	0	0	204.144	0	10.7312	189.328	0	421.681	400.597
Column Total	0	0	0	0	0	0	0	312.337	1.4054	5.49532	1.09683	1.10312	0.413483	0.358151	17.4946	0	0	0	0	0	182.836	0	180.542	204.144	87.6653	98.2543	258.311	1.90123	1353.36	1285.69
Separate manufacturing scrap + LIBS 2050
	Primary virgin Al	Primary virgin Cu	Primary virgin Mg	Primary virgin Mn	Primary virgin Si	Primary virgin Fe	Primary virgin Zn	Secondary virgin Al	Secondary virgin Cu	Secondary virgin Mg	Secondary virgin Mn	Secondary virgin Si	Secondary virgin Fe	Secondary virgin Zn	All Twitch	Sheet 5xxx manufacturing scrap	Sheet Ford Low Mg manufacturing scrap	Sheet Ford High Mg manufacturing scrap	Sheet 6xxx 6005C manufacturing scrap	Sheet 6xxx 6016 manufacturing scrap	Sheet Ford Low Cu manufacturing scrap	Sheet Ford High Cu manufacturing scrap	Separated stream (0, 0)	Separated stream (0, 1)	Separated stream (0, 2)	Row Total	Total Demand (adjusted for melt yield)
Sheet 5xxx	0	0	0	0	0	0	0	91.9507	0.0376383	4.87076	0.311425	0	0.0254716	0.0635691	0	3.99415	31.5198	16.8565	0	0	0	0	0	0	0	149.63	142.149
Sheet Ford Low Mg	0	0	0	0	0	0	0	9.50471	0.0129795	0.243806	0.129772	0	0.162258	0.0433357	0	68.4448	34.8629	0	0	0	0	0	0	23.7158	0	137.12	130.264
Sheet Ford High Mg	0	0	0	0	0	0	0	52.8827	0.0123781	2.85235	0.183027	0	0.0469593	0.0381542	0	0	0	24.8638	0	0	0	0	0	5.29838	0	86.1778	81.8689
Sheet 6xxx 6005C	0	0	0	0	0	0	0	33.246	0	0	0.0735065	0.172608	0.00856267	0.011461	0	0	0	0	27.7082	0	0	0	9.21404	20.1065	0	90.5409	86.0138
Sheet 6xxx 6016	0	0	0	0	0	0	0	57.6393	0	0.301956	0.0667737	0.802578	0.0409946	0	0	0	0	0	16.1244	10.9911	0	0	0	4.57375	0	90.5409	86.0138
Sheet Ford Low Cu	0	0	0	0	0	0	0	92.2199	0	0.45616	0	0.529865	0.00583342	0.0181317	0	0	0	0	0	0	182.836	0	17.285	84.3162	0	377.668	358.784
Sheet Ford High Cu	0	0	0	0	0	0	0	117.557	1.10421	1.0038	0.33784	0.573056	0.221839	0	0	0	0	0	0	32.8415	0	204.144	0	63.8976	0	421.681	400.597
Column Total	0	0	0	0	0	0	0	455	1.1672	9.72883	1.10234	2.07811	0.511918	0.174652	0	72.4389	66.3827	41.7204	43.8326	43.8326	182.836	204.144	26.4991	201.908	0	1353.36	1285.69
5xxx -> 6xxx + LIBS 2050
	Primary virgin Al	Primary virgin Cu	Primary virgin Mg	Primary virgin Mn	Primary virgin Si	Primary virgin Fe	Primary virgin Zn	Secondary virgin Al	Secondary virgin Cu	Secondary virgin Mg	Secondary virgin Mn	Secondary virgin Si	Secondary virgin Fe	Secondary virgin Zn	All Twitch	Sheet 5xxx manufacturing scrap	Sheet Ford Low Mg manufacturing scrap	Sheet Ford High Mg manufacturing scrap	Sheet 6xxx 6005C manufacturing scrap	Sheet 6xxx 6016 manufacturing scrap	Sheet Ford Low Cu manufacturing scrap	Sheet Ford High Cu manufacturing scrap	Mixed ['Sheet 5xxx' 'Sheet 6xxx 6005C' 'Sheet 6xxx 6016'] manufacturing scrap	Separated stream (0, 0)	Separated stream (0, 1)	Separated stream (0, 2)	Row Total	Total Demand (adjusted for melt yield)
Sheet 5xxx	0	0	0	0	0	0	0	0	0	0	0	0	0	0	0	0	0	0	0	0	0	0	0	0	0	0	0	0
Sheet Ford Low Mg	0	0	0	0	0	0	0	0	0	0	0	0	0	0	0	0	0	0	0	0	0	0	0	0	0	0	0	0
Sheet Ford High Mg	0	0	0	0	0	0	0	0	0	0	0	0	0	0	0	0	0	0	0	0	0	0	0	0	0	0	0	0
Sheet 6xxx 6005C	0	0	0	0	0	0	0	36.4586	0	0	0.128303	0	0.0370308	0.0277957	0	0	0	0	0	0	0	0	75.7918	11.8581	41.0543	0	165.356	157.088
Sheet 6xxx 6016	0	0	0	0	0	0	0	75.3761	0	0.414818	0.105992	1.20346	0.104421	0	0	0	0	0	0	0	0	1.68937	84.3124	0	2.14928	0	165.356	157.088
Sheet Ford Low Cu	0	0	0	0	0	0	0	146.745	0	0.725867	0	0.84315	0.00928247	0.0288522	0	0	0	0	0	0	290.939	0	0	27.5049	134.169	0	600.966	570.917
Sheet Ford High Cu	0	0	0	0	0	0	0	149.913	1.11356	1.15375	0.355278	0.911375	0.199529	0	0	0	0	0	0	0	0	202.455	0	0	65.5797	0	421.681	400.597
Column Total	0	0	0	0	0	0	0	408.493	1.11356	2.29444	0.589573	2.95798	0.350264	0.0566478	0	0	0	0	0	0	290.939	204.144	160.104	39.363	242.952	0	1353.36	1285.69
HRC + 5xxx -> 6xxx + LIBS 2050
	Primary virgin Al	Primary virgin Cu	Primary virgin Mg	Primary virgin Mn	Primary virgin Si	Primary virgin Fe	Primary virgin Zn	Secondary virgin Al	Secondary virgin Cu	Secondary virgin Mg	Secondary virgin Mn	Secondary virgin Si	Secondary virgin Fe	Secondary virgin Zn	All Twitch	Sheet 5xxx manufacturing scrap	Sheet Ford Low Mg manufacturing scrap	Sheet Ford High Mg manufacturing scrap	Sheet 6xxx 6005C manufacturing scrap	Sheet 6xxx 6016 manufacturing scrap	Sheet Ford Low Cu manufacturing scrap	Sheet Ford High Cu manufacturing scrap	Sheet HRC 5xxx Alloy 2 manufacturing scrap	Sheet HRC 6xxx Alloy 2 manufacturing scrap	Mixed ['Sheet 5xxx' 'Sheet 6xxx 6005C' 'Sheet 6xxx 6016'] manufacturing scrap	Separated stream (0, 0)	Separated stream (0, 1)	Separated stream (0, 2)	Row Total	Total Demand (adjusted for melt yield)
Sheet 5xxx	0	0	0	0	0	0	0	0	0	0	0	0	0	0	0	0	0	0	0	0	0	0	0	0	0	0	0	0	0	0
Sheet Ford Low Mg	0	0	0	0	0	0	0	0	0	0	0	0	0	0	0	0	0	0	0	0	0	0	0	0	0	0	0	0	0	0
Sheet Ford High Mg	0	0	0	0	0	0	0	0	0	0	0	0	0	0	0	0	0	0	0	0	0	0	0	0	0	0	0	0	0	0
Sheet 6xxx 6005C	0	0	0	0	0	0	0	84.5028	0	0	0.15822	0	0.0121122	0	0	0	0	0	0	0	0	0	0	0	38.4389	14.2819	22.3748	5.58718	165.356	157.088
Sheet 6xxx 6016	0	0	0	0	0	0	0	66.7152	0.0129379	0.380399	0.104263	1.13093	0.117979	0	0	0	0	0	0	0	0	0	0	0	96.8942	0	0	0	165.356	157.088
Sheet Ford Low Cu	0	0	0	0	0	0	0	146.031	0.0600931	0.175503	0	0.573205	0.0382031	0	0	0	0	0	0	0	290.939	0	0	0	24.771	49.187	86.1598	3.0304	600.966	570.917
Sheet Ford High Cu	0	0	0	0	0	0	0	0	0	0	0	0	0	0	0	0	0	0	0	0	0	0	0	0	0	0	0	0	0	0
Sheet HRC 5xxx Alloy 2	0	0	0	0	0	0	0	0	0	0	0	0	0	0	0	0	0	0	0	0	0	0	0	0	0	0	0	0	0	0
Sheet HRC 6xxx Alloy 2	0	0	0	0	0	0	0	18.5888	0.951652	0	0.479718	0	0.0634159	0.0658613	11.6877	0	0	0	0	0	0	0	0	204.144	0	35.0989	150.601	0	421.681	400.597
Column Total	0	0	0	0	0	0	0	315.838	1.02468	0.555902	0.742201	1.70413	0.231711	0.0658613	11.6877	0	0	0	0	0	290.939	0	0	204.144	160.104	98.5678	259.135	8.61758	1353.36	1285.69
P0610 + HRC + No FCC + Separate manufacturing scrap + 5xxx -> 6xxx + LIBS 2050
	Primary virgin Al	Primary virgin Cu	Primary virgin Mg	Primary virgin Mn	Primary virgin Si	Primary virgin Fe	Primary virgin Zn	Secondary virgin Al	Secondary virgin Cu	Secondary virgin Mg	Secondary virgin Mn	Secondary virgin Si	Secondary virgin Fe	Secondary virgin Zn	All Twitch	Sheet 5xxx manufacturing scrap	Sheet Ford Low Mg manufacturing scrap	Sheet Ford High Mg manufacturing scrap	Sheet 6xxx 6005C manufacturing scrap	Sheet 6xxx 6016 manufacturing scrap	Sheet Ford Low Cu manufacturing scrap	Sheet Ford High Cu manufacturing scrap	Sheet HRC 5xxx Alloy 2 manufacturing scrap	Sheet HRC 6xxx Alloy 2 manufacturing scrap	Separated stream (0, 0)	Separated stream (0, 1)	Separated stream (0, 2)	Row Total	Total Demand (adjusted for melt yield)
Sheet 5xxx	0	0	0	0	0	0	0	0	0	0	0	0	0	0	0	0	0	0	0	0	0	0	0	0	0	0	0	0	0
Sheet Ford Low Mg	0	0	0	0	0	0	0	0	0	0	0	0	0	0	0	0	0	0	0	0	0	0	0	0	0	0	0	0	0
Sheet Ford High Mg	0	0	0	0	0	0	0	0	0	0	0	0	0	0	0	0	0	0	0	0	0	0	0	0	0	0	0	0	0
Sheet 6xxx 6005C	0	0	0	0	0	0	0	76.9271	0	0	0.150852	0.121593	0.0780703	0	0	0	0	0	48.8289	0	0	0	0	0	13.3831	20.8364	5.02989	165.356	157.088
Sheet 6xxx 6016	0	0	0	0	0	0	0	47.1569	0	0.288765	0.0949171	0.865615	0.153604	0	0	0	0	0	31.2232	80.0521	0	0	0	0	0	5.5208	0	165.356	157.088
Sheet Ford Low Cu	0	0	0	0	0	0	0	156.206	0.0240707	0.271703	0	0.739684	0.113693	0	0	0	0	0	0	0	290.939	0	0	0	47.0572	103.085	2.52866	600.966	570.917
Sheet Ford High Cu	0	0	0	0	0	0	0	0	0	0	0	0	0	0	0	0	0	0	0	0	0	0	0	0	0	0	0	0	0
Sheet HRC 5xxx Alloy 2	0	0	0	0	0	0	0	0	0	0	0	0	0	0	0	0	0	0	0	0	0	0	0	0	0	0	0	0	0
Sheet HRC 6xxx Alloy 2	0	0	0	0	0	0	0	34.5758	0.980144	0	0.495069	0	0.101787	0.0510718	13.9566	0	0	0	0	0	0	0	0	204.144	38.0051	129.371	0	421.681	400.597
Column Total	0	0	0	0	0	0	0	314.866	1.00421	0.560468	0.740838	1.72689	0.447154	0.0510718	13.9566	0	0	0	80.0521	80.0521	290.939	0	0	204.144	98.4453	258.813	7.55855	1353.36	1285.69
[Ford ABS case study] BAU 2025
	Primary virgin Al	Primary virgin Cu	Primary virgin Mg	Primary virgin Mn	Primary virgin Si	Primary virgin Fe	Primary virgin Zn	Secondary virgin Al	Secondary virgin Cu	Secondary virgin Mg	Secondary virgin Mn	Secondary virgin Si	Secondary virgin Fe	Secondary virgin Zn	Sheet Supply	Sheet Ford Low Mg manufacturing scrap	Sheet Ford High Mg manufacturing scrap	Sheet Ford Low Cu manufacturing scrap	Sheet Ford High Cu manufacturing scrap	Row Total	Total Demand (adjusted for melt yield)
Sheet Ford Low Mg	0	0	0	0	0	0	0	42.7123	0.03083	1.48827	0.146387	0	0.0660482	0.0253407	1.70111	43.3279	0	0	0	89.4982	85.0233
Sheet Ford High Mg	0	0	0	0	0	0	0	27.0931	0.00935973	1.3535	0.0883063	0	0.0241778	0.0168803	0.431952	0	27.2308	0	0	56.2481	53.4357
Sheet Ford Low Cu	0	0	0	0	0	0	0	146.891	0	0.831896	0.0327584	0.491758	0.0686143	0	13.9281	0	0	58.4811	25.7783	246.503	234.178
Sheet Ford High Cu	0	0	0	0	0	0	0	104.161	0.919385	0.724453	0.292096	0.637286	0.174079	0	0	0	0	60.856	107.466	275.23	261.469
Column Total	0	0	0	0	0	0	0	320.857	0.959574	4.39812	0.559547	1.12904	0.332919	0.042221	16.0611	43.3279	27.2308	119.337	133.244	667.479	634.105
[Ford ABS case study] BAU 2050
	Primary virgin Al	Primary virgin Cu	Primary virgin Mg	Primary virgin Mn	Primary virgin Si	Primary virgin Fe	Primary virgin Zn	Secondary virgin Al	Secondary virgin Cu	Secondary virgin Mg	Secondary virgin Mn	Secondary virgin Si	Secondary virgin Fe	Secondary virgin Zn	Sheet Supply	Sheet Ford Low Mg manufacturing scrap	Sheet Ford High Mg manufacturing scrap	Sheet Ford Low Cu manufacturing scrap	Sheet Ford High Cu manufacturing scrap	Row Total	Total Demand (adjusted for melt yield)
Sheet Ford Low Mg	0	0	0	0	0	0	0	58.7148	0.0569838	1.45684	0.207703	0	0.116262	0.0336483	3.24925	31.5645	41.7204	0	0	137.12	130.264
Sheet Ford High Mg	0	0	0	0	0	0	0	48.2528	0.0045476	2.89739	0.151865	0	0.0219965	0.0310223	0	34.8182	0	0	0	86.1778	81.8689
Sheet Ford Low Cu	0	0	0	0	0	0	0	242.73	0.210315	1.40727	0.115648	0.878816	0.14223	0	20.6063	0	0	111.577	0	377.668	358.784
Sheet Ford High Cu	0	0	0	0	0	0	0	142.043	1.1982	0.979853	0.382081	0.851629	0.229815	0	0.592561	0	0	71.259	204.144	421.681	400.597
Column Total	0	0	0	0	0	0	0	491.741	1.47004	6.74135	0.857297	1.73044	0.510303	0.0646706	24.4481	66.3827	41.7204	182.836	204.144	1022.65	971.514
[Ford ABS case study] HRC 2050
	Primary virgin Al	Primary virgin Cu	Primary virgin Mg	Primary virgin Mn	Primary virgin Si	Primary virgin Fe	Primary virgin Zn	Secondary virgin Al	Secondary virgin Cu	Secondary virgin Mg	Secondary virgin Mn	Secondary virgin Si	Secondary virgin Fe	Secondary virgin Zn	Sheet Supply	Sheet Ford Low Mg manufacturing scrap	Sheet Ford High Mg manufacturing scrap	Sheet Ford Low Cu manufacturing scrap	Sheet Ford High Cu manufacturing scrap	Sheet HRC 5xxx Alloy 2 manufacturing scrap	Sheet HRC 6xxx Alloy 2 manufacturing scrap	Row Total	Total Demand (adjusted for melt yield)
Sheet Ford Low Mg	0	0	0	0	0	0	0	0	0	0	0	0	0	0	0	0	0	0	0	0	0	0	0
Sheet Ford High Mg	0	0	0	0	0	0	0	0	0	0	0	0	0	0	0	0	0	0	0	0	0	0	0
Sheet Ford Low Cu	0	0	0	0	0	0	0	177.727	0.153992	1.0304	0.0846775	0.643469	0.104141	0	15.0879	0	0	182.836	0	0	0	377.668	358.784
Sheet Ford High Cu	0	0	0	0	0	0	0	0	0	0	0	0	0	0	0	0	0	0	0	0	0	0	0
Sheet HRC 5xxx Alloy 2	0	0	0	0	0	0	0	85.4554	0.142341	3.63001	0.256169	0	0.169176	0.189798	0	0	0	0	0	108.103	25.3521	223.298	212.133
Sheet HRC 6xxx Alloy 2	0	0	0	0	0	0	0	184.064	1.29092	0.887304	0.662922	0	0.238765	0.018705	55.7263	0	0	0	0	0	178.792	421.681	400.597
Column Total	0	0	0	0	0	0	0	447.246	1.58725	5.54771	1.00377	0.643469	0.512082	0.208503	70.8142	0	0	182.836	0	108.103	204.144	1022.65	971.514
[Ford ABS case study] Shifting demand for 5xxx to 6xxx 2050
	Primary virgin Al	Primary virgin Cu	Primary virgin Mg	Primary virgin Mn	Primary virgin Si	Primary virgin Fe	Primary virgin Zn	Secondary virgin Al	Secondary virgin Cu	Secondary virgin Mg	Secondary virgin Mn	Secondary virgin Si	Secondary virgin Fe	Secondary virgin Zn	Sheet Supply	Sheet Ford Low Mg manufacturing scrap	Sheet Ford High Mg manufacturing scrap	Sheet Ford Low Cu manufacturing scrap	Sheet Ford High Cu manufacturing scrap	Row Total	Total Demand (adjusted for melt yield)
Sheet Ford Low Mg	0	0	0	0	0	0	0	0	0	0	0	0	0	0	0	0	0	0	0	0	0
Sheet Ford High Mg	0	0	0	0	0	0	0	0	0	0	0	0	0	0	0	0	0	0	0	0	0
Sheet Ford Low Cu	0	0	0	0	0	0	0	242.515	0	1.44261	0.0611877	0.801144	0.111466	0	22.998	0	0	290.939	42.0967	600.966	570.917
Sheet Ford High Cu	0	0	0	0	0	0	0	247.041	1.49656	1.6402	0.49502	1.29335	0.318979	0	7.34839	0	0	0	162.047	421.681	400.597
Column Total	0	0	0	0	0	0	0	489.556	1.49656	3.08281	0.556208	2.09449	0.430445	0	30.3464	0	0	290.939	204.144	1022.65	971.514
[Ford ABS case study] Steel rivet reduction 2050
	Primary virgin Al	Primary virgin Cu	Primary virgin Mg	Primary virgin Mn	Primary virgin Si	Primary virgin Fe	Primary virgin Zn	Secondary virgin Al	Secondary virgin Cu	Secondary virgin Mg	Secondary virgin Mn	Secondary virgin Si	Secondary virgin Fe	Secondary virgin Zn	Sheet Supply	Sheet Ford Low Mg manufacturing scrap	Sheet Ford High Mg manufacturing scrap	Sheet Ford Low Cu manufacturing scrap	Sheet Ford High Cu manufacturing scrap	Row Total	Total Demand (adjusted for melt yield)
Sheet Ford Low Mg	0	0	0	0	0	0	0	65.4388	0.0472306	2.28017	0.224284	0	0.101933	0.0388315	2.60643	66.3827	0	0	0	137.12	130.264
Sheet Ford High Mg	0	0	0	0	0	0	0	41.5091	0.014339	2.0737	0.135295	0	0.0372309	0.025864	0.661836	0	41.7204	0	0	86.1778	81.8689
Sheet Ford Low Cu	0	0	0	0	0	0	0	242.726	0.210379	1.4052	0.115702	0.878397	0.147972	0	20.7655	0	0	111.418	0	377.668	358.784
Sheet Ford High Cu	0	0	0	0	0	0	0	141.894	1.19807	0.978929	0.382011	0.851076	0.229889	0	0.584366	0	0	71.4182	204.144	421.681	400.597
Column Total	0	0	0	0	0	0	0	491.568	1.47002	6.73799	0.857293	1.72947	0.517025	0.0646955	24.6181	66.3827	41.7204	182.836	204.144	1022.65	971.514
[Ford ABS case study] Processing Zorba into Twitch by size 2050
	Primary virgin Al	Primary virgin Cu	Primary virgin Mg	Primary virgin Mn	Primary virgin Si	Primary virgin Fe	Primary virgin Zn	Secondary virgin Al	Secondary virgin Cu	Secondary virgin Mg	Secondary virgin Mn	Secondary virgin Si	Secondary virgin Fe	Secondary virgin Zn	Zorba small	Zorba medium	Zorba large	NF oversized	Sheet Ford Low Mg manufacturing scrap	Sheet Ford High Mg manufacturing scrap	Sheet Ford Low Cu manufacturing scrap	Sheet Ford High Cu manufacturing scrap	Row Total	Total Demand (adjusted for melt yield)
Sheet Ford Low Mg	0	0	0	0	0	0	0	58.6758	0.0639711	1.45232	0.208699	0	0.117698	0.0413953	0	0	0	3.27561	31.5645	41.7204	0	0	137.12	130.264
Sheet Ford High Mg	0	0	0	0	0	0	0	48.2528	0.0045476	2.89739	0.151865	0	0.0219965	0.0310223	0	0	0	0	34.8182	0	0	0	86.1778	81.8689
Sheet Ford Low Cu	0	0	0	0	0	0	0	153.043	0	0.674047	0.029238	0.218195	0.0585284	0	0	0	0	24.2632	0	0	182.836	16.5444	377.668	358.784
Sheet Ford High Cu	0	0	0	0	0	0	0	218.775	1.32359	1.34606	0.433662	1.01558	0.276931	0	0	0	0	10.9106	0	0	0	187.6	421.681	400.597
Column Total	0	0	0	0	0	0	0	478.747	1.39211	6.36982	0.823464	1.23378	0.475154	0.0724176	0	0	0	38.4494	66.3827	41.7204	182.836	204.144	1022.65	971.514
[Ford ABS case study] LIBS 2050
	Primary virgin Al	Primary virgin Cu	Primary virgin Mg	Primary virgin Mn	Primary virgin Si	Primary virgin Fe	Primary virgin Zn	Secondary virgin Al	Secondary virgin Cu	Secondary virgin Mg	Secondary virgin Mn	Secondary virgin Si	Secondary virgin Fe	Secondary virgin Zn	Ford Twitch	Sheet Ford Low Mg manufacturing scrap	Sheet Ford High Mg manufacturing scrap	Sheet Ford Low Cu manufacturing scrap	Sheet Ford High Cu manufacturing scrap	Separated stream (0, 0)	Separated stream (0, 1)	Separated stream (0, 2)	Row Total	Total Demand (adjusted for melt yield)
Sheet Ford Low Mg	0	0	0	0	0	0	0	43.3086	0.0326135	1.24895	0.168316	0	0.111082	0.0384399	0	37.1132	41.7204	0	0	0	13.3787	0	137.12	130.264
Sheet Ford High Mg	0	0	0	0	0	0	0	52.7016	0.00687086	3.07434	0.168003	0	0.0301198	0.0345896	0	29.2694	0	0	0	0	0.892779	0	86.1778	81.8689
Sheet Ford Low Cu	0	0	0	0	0	0	0	136.369	0.0926329	0.959536	0	0.724033	0.124234	0.0465949	0	0	0	182.836	0	0	56.5148	0	377.668	358.784
Sheet Ford High Cu	0	0	0	0	0	0	0	167.196	1.13018	1.1514	0.322296	0.924189	0.260457	0	0	0	0	0	204.144	0	46.5516	0	421.681	400.597
Column Total	0	0	0	0	0	0	0	399.576	1.2623	6.43422	0.658615	1.64822	0.525893	0.119624	0	66.3827	41.7204	182.836	204.144	0	117.338	0	1022.65	971.514
[Ford ABS case study] VD1 2050
	Primary virgin Al	Primary virgin Cu	Primary virgin Mg	Primary virgin Mn	Primary virgin Si	Primary virgin Fe	Primary virgin Zn	Secondary virgin Al	Secondary virgin Cu	Secondary virgin Mg	Secondary virgin Mn	Secondary virgin Si	Secondary virgin Fe	Secondary virgin Zn	VD1 Box	VD1 ABS in Cab	Sheet Ford Low Mg manufacturing scrap	Sheet Ford High Mg manufacturing scrap	Sheet Ford Low Cu manufacturing scrap	Sheet Ford High Cu manufacturing scrap	Row Total	Total Demand (adjusted for melt yield)
Sheet Ford Low Mg	0	0	0	0	0	0	0	60.1498	0.011301	2.2299	0.208816	0.0486501	0.107147	0	0	7.98206	66.3827	0	0	0	137.12	130.264
Sheet Ford High Mg	0	0	0	0	0	0	0	39.561	0	2.0522	0.12947	0.00877925	0.0382467	0.0117037	0	2.65599	0	41.7204	0	0	86.1778	81.8689
Sheet Ford Low Cu	0	0	0	0	0	0	0	183.559	0.0913343	1.18828	0.00409093	1.1106	0.195088	0	70.5073	17.0863	0	0	103.926	0	377.668	358.784
Sheet Ford High Cu	0	0	0	0	0	0	0	135.063	1.19215	0.939385	0.378755	0.826357	0.225725	0	0	0	0	0	78.9108	204.144	421.681	400.597
Column Total	0	0	0	0	0	0	0	418.333	1.29478	6.40975	0.721131	1.99439	0.566206	0.0117037	70.5073	27.7243	66.3827	41.7204	182.836	204.144	1022.65	971.514
[Ford ABS case study] VD2 2050
	Primary virgin Al	Primary virgin Cu	Primary virgin Mg	Primary virgin Mn	Primary virgin Si	Primary virgin Fe	Primary virgin Zn	Secondary virgin Al	Secondary virgin Cu	Secondary virgin Mg	Secondary virgin Mn	Secondary virgin Si	Secondary virgin Fe	Secondary virgin Zn	VD2 Box	VD2 Hood & Tailgate	VD2 Doors	VD2 ABS in BIW & Fender	Sheet Ford Low Mg manufacturing scrap	Sheet Ford High Mg manufacturing scrap	Sheet Ford Low Cu manufacturing scrap	Sheet Ford High Cu manufacturing scrap	Row Total	Total Demand (adjusted for melt yield)
Sheet Ford Low Mg	0	0	0	0	0	0	0	40.174	0.0162905	1.18763	0.147263	0	0.11598	0	0	0	1.77493	16.802	35.1818	41.7204	0	0	137.12	130.264
Sheet Ford High Mg	0	0	0	0	0	0	0	50.3825	0.00489274	2.97822	0.159332	0	0.0267225	0	0	0	1.42525	0	31.2009	0	0	0	86.1778	81.8689
Sheet Ford Low Cu	0	0	0	0	0	0	0	150.516	0.158975	0.886922	0	0.930991	0.14601	0	0	0	3.02972	39.1625	0	0	182.836	0	377.668	358.784
Sheet Ford High Cu	0	0	0	0	0	0	0	84.4282	0.878014	0.431082	0.133582	0.448502	0.24722	0	59.66	27.1182	0	44.1917	0	0	0	204.144	421.681	400.597
Column Total	0	0	0	0	0	0	0	325.501	1.05817	5.48385	0.440176	1.37949	0.535933	0	59.66	27.1182	6.2299	100.156	66.3827	41.7204	182.836	204.144	1022.65	971.514

## Sheet: 5. Binding constraints ranked
Below are the top five compositional constraints for each recycling scenario, listed in terms of their potential impact on the objective function when the constraint is relaxed.
BAU 2025
	Name	Max est. impact	Slack	Shadow Price	Allowable increase
	Upper bound on Zn in Sheet Ford High Cu (secondary production)	2.49812	0	-0.933638	2.67569
	Upper bound on Zn in Sheet Ford Low Cu (secondary production)	2.49812	0	-0.933638	2.67569
	Upper bound on Si in Sheet Ford Low Mg (secondary production)	2.37749	0	-0.207415	11.4625
	Upper bound on Zn in Sheet 6xxx 6005C(secondary production)	1.11781	0	-0.933638	1.19726
	Upper bound on Si in Sheet Ford High Mg (secondary production)	0.526732	0	-0.207415	2.5395
BAU 2050
	Name	Max est. impact	Slack	Shadow Price	Allowable increase
	Upper bound on Si in Sheet Ford Low Mg (secondary production)	7.35249	0	-0.292028	25.1773
	Upper bound on Si in Sheet Ford High Mg (secondary production)	2.26234	0	-0.292028	7.747
	Upper bound on Zn in Sheet 6xxx 6005C(secondary production)	1.76331	0	-0.865271	2.03787
	Upper bound on Zn in Sheet Ford Low Cu (secondary production)	1.76331	0	-0.865271	2.03787
	Upper bound on Zn in Sheet Ford High Cu (secondary production)	1.76331	0	-0.865271	2.03787
Low GR 2050
	Name	Max est. impact	Slack	Shadow Price	Allowable increase
	Upper bound on Si in Sheet Ford Low Mg (secondary production)	4.53555	0	-0.292028	15.5312
	Upper bound on Zn in Sheet Ford Low Cu (secondary production)	2.11615	0	-0.869689	2.43323
	Upper bound on Zn in Sheet Ford High Cu (secondary production)	1.69675	0	-0.869689	1.95098
	Upper bound on Zn in Sheet 6xxx 6005C(secondary production)	1.56801	0	-0.869689	1.80296
	Upper bound on Si in Sheet Ford High Mg (secondary production)	1.38359	0	-0.292028	4.73788
High GR 2050
	Name	Max est. impact	Slack	Shadow Price	Allowable increase
	Upper bound on Si in Sheet Ford Low Mg (secondary production)	8.81745	0	-0.292028	30.1938
	Upper bound on Si in Sheet Ford High Mg (secondary production)	2.68341	0	-0.292028	9.18887
	Upper bound on Mg in Sheet Ford High Cu (secondary production)	2.04102	0	-0.0455854	44.7735
	Upper bound on Mg in Sheet Ford Low Cu (secondary production)	2.04102	0	-0.0455854	44.7735
	Upper bound on Zn in Sheet 6xxx 6005C(secondary production)	1.81489	0	-0.864068	1.85471
Greene 2050
	Name	Max est. impact	Slack	Shadow Price	Allowable increase
	Upper bound on Si in Sheet Ford Low Mg (secondary production)	7.35249	0	-0.292028	25.1773
	Upper bound on Si in Sheet Ford High Mg (secondary production)	2.26234	0	-0.292028	7.747
	Upper bound on Zn in Sheet 6xxx 6005C(secondary production)	1.76331	0	-0.865271	2.03787
	Upper bound on Zn in Sheet Ford Low Cu (secondary production)	1.76331	0	-0.865271	2.03787
	Upper bound on Zn in Sheet Ford High Cu (secondary production)	1.76331	0	-0.865271	2.03787
P0610 2050
	Name	Max est. impact	Slack	Shadow Price	Allowable increase
	Upper bound on Zn in Sheet Ford Low Cu (secondary production)	6.01732	0	-0.855449	7.03411
	Upper bound on Si in Sheet Ford Low Mg (secondary production)	5.56766	0	-0.290442	19.1696
	Upper bound on Zn in Sheet 6xxx 6005C(secondary production)	2.50417	0	-0.855449	2.92731
	Upper bound on Si in Sheet 5xxx(secondary production)	2.25999	0	-0.290442	7.78122
	Upper bound on Mg in Sheet 6xxx 6005C(secondary production)	1.8575	0	-0.0476541	38.9789
P0000 2050
	Name	Max est. impact	Slack	Shadow Price	Allowable increase
	Upper bound on Si in Sheet Ford Low Mg (secondary production)	7.35918	0	-0.286559	25.6812
	Upper bound on Zn in Sheet Ford Low Cu (secondary production)	4.74562	0	-0.833833	5.69133
	Upper bound on Si in Sheet 5xxx(secondary production)	2.41563	0	-0.286559	8.42976
	Upper bound on Zn in Sheet 6xxx 6005C(secondary production)	2.30728	0	-0.833833	2.76707
	Upper bound on Zn in Sheet Ford High Cu (secondary production)	1.1165	0	-0.833833	1.339
HRC 2050
	Name	Max est. impact	Slack	Shadow Price	Allowable increase
	Upper bound on Si in Sheet HRC 5xxx Alloy 2(secondary production)	29.725	0	-0.292028	101.788
	Upper bound on Zn in Sheet Ford Low Cu (secondary production)	15.5373	0	-1.05484	14.7295
	Upper bound on Zn in Sheet HRC 6xxx Alloy 2(secondary production)	2.10494	0	-1.05484	1.9955
	Upper bound on Zn in Sheet 6xxx 6005C(secondary production)	2.00744	0	-1.05484	0.158769
	Upper bound on Zn in Sheet 6xxx 6016(secondary production)	0.271294	0	-1.05484	0.138916
No FCC 2050
	Name	Max est. impact	Slack	Shadow Price	Allowable increase
	Upper bound on Zn in Sheet Ford Low Cu (secondary production)	10.5467	0	-0.865271	12.1889
	Upper bound on Zn in Sheet Ford High Cu (secondary production)	10.5467	0	-0.865271	12.1889
	Upper bound on Zn in Sheet 6xxx 6005C(secondary production)	4.39329	0	-0.865271	5.07735
	Upper bound on Si in Sheet Ford Low Mg (secondary production)	2.90412	0	-0.292028	9.94466
	Upper bound on Si in Sheet 5xxx(secondary production)	1.46684	0	-0.292028	2.41263
Separate manufacturing scrap 2050
	Name	Max est. impact	Slack	Shadow Price	Allowable increase
	Upper bound on Zn in Sheet Ford High Cu (secondary production)	25.1466	0	-1.05484	23.8392
	Upper bound on Zn in Sheet Ford Low Cu (secondary production)	23.502	0	-1.05484	22.28
	Upper bound on Si in Sheet Ford Low Mg (secondary production)	4.30268	0	-0.292028	14.7338
	Upper bound on Zn in Sheet 6xxx 6005C(secondary production)	2.92012	0	-1.05484	1.27291
	Upper bound on Zn in Sheet 6xxx 6016(secondary production)	1.43758	0	-1.05484	1.36283
Shifting 5xxx to 6xxx demand 2050
	Name	Max est. impact	Slack	Shadow Price	Allowable increase
	Upper bound on Zn in Sheet Ford High Cu (secondary production)	27.2322	0	-1.00274	27.1579
	Upper bound on Zn in Sheet Ford Low Cu (secondary production)	18.2279	0	-1.00274	18.1782
	Upper bound on Zn in Sheet 6xxx 6005C(secondary production)	4.22932	0	-1.00274	1.22956
	Upper bound on Zn in Sheet 6xxx 6016(secondary production)	0.944473	0	-1.00274	0.941896
LIBS 2050
	Name	Max est. impact	Slack	Shadow Price	Allowable increase
	Upper bound on Zn in Sheet Ford High Cu (secondary production)	67.9307	0	-14.5849	4.65761
	Upper bound on Si in Sheet Ford Low Mg (secondary production)	38.5804	0	-2.43825	15.8229
	Upper bound on Mg in Sheet 6xxx 6005C(secondary production)	34.8896	0	-0.413013	84.476
	Upper bound on Mn in Sheet Ford Low Cu (secondary production)	26.0867	0	-6.49677	4.01534
	Upper bound on Mg in Sheet Ford High Cu (secondary production)	24.3319	0	-0.309045	78.7324
Castings removal 2050
	Name	Max est. impact	Slack	Shadow Price	Allowable increase
	Upper bound on Si in Sheet Ford Low Mg (secondary production)	25.1356	0	-1.11662	22.5105
	Upper bound on Zn in Sheet 6xxx 6005C(secondary production)	9.2442	0	-2.55304	0.980898
	Upper bound on Si in Sheet Ford High Mg (secondary production)	8.65044	0	-1.11662	7.747
	Upper bound on Zn in Sheet Ford High Cu (secondary production)	8.19108	0	-2.55304	3.20837
	Upper bound on Mg in Sheet Ford High Cu (secondary production)	3.64246	0	-0.180304	20.2018
Isolated Ford shredding 2050
	Name	Max est. impact	Slack	Shadow Price	Allowable increase
	Upper bound on Zn in Sheet 6xxx 6005C(secondary production)	4.80549	0	-1.49536	0.798398
	Upper bound on Si in Sheet Ford High Mg (secondary production)	2.28167	0	-0.292028	7.81317
	Upper bound on Si in Sheet Ford Low Mg (secondary production)	2.04493	0	-0.292028	7.00252
	Upper bound on Zn in Sheet Ford Low Cu (secondary production)	1.96046	0	-1.49536	1.31103
	Upper bound on Zn in Sheet Ford High Cu (secondary production)	1.96046	0	-1.49536	1.31103
HRC + 5xxx -> 6xxx 2050
	Name	Max est. impact	Slack	Shadow Price	Allowable increase
	Upper bound on Zn in Sheet Ford Low Cu (secondary production)	15.586	0	-1.00274	15.5435
	Upper bound on Zn in Sheet 6xxx 6005C(secondary production)	5.06961	0	-1.00274	0.592323
	Upper bound on Zn in Sheet HRC 6xxx Alloy 2(secondary production)	3.39078	0	-1.00274	3.38153
	Upper bound on Zn in Sheet 6xxx 6016(secondary production)	1.25998	0	-1.00274	1.25654
HRC + LIBS 2050
	Name	Max est. impact	Slack	Shadow Price	Allowable increase
	Upper bound on Si in Sheet HRC 5xxx Alloy 2(secondary production)	1.98208	0	-0.427933	4.63176
	Upper bound on Mg in Sheet HRC 6xxx Alloy 2(secondary production)	1.69445	0	-0.0566188	29.9273
	Upper bound on Zn in Sheet 6xxx 6016(secondary production)	0.984047	0	-6.28993	0.156448
	Upper bound on Mg in Sheet 6xxx 6005C(secondary production)	0.762499	0	-0.0806909	9.44962
	Upper bound on Mn in Sheet Ford Low Cu (secondary production)	0.762128	0	-1.01092	0.753899
Separate manufacturing scrap + LIBS 2050
	Name	Max est. impact	Slack	Shadow Price	Allowable increase
	Upper bound on Zn in Sheet Ford High Cu (secondary production)	58.886	0	-17.5275	3.35963
	Upper bound on Cu in Sheet 6xxx 6005C(secondary production)	16.0538	0	-2.77038	2.42296
	Upper bound on Si in Sheet 5xxx(secondary production)	7.59109	0	-1.61071	0.597211
	Upper bound on Cu in Sheet Ford Low Cu (secondary production)	6.9607	0	-1.81636	3.83222
	Upper bound on Si in Sheet Ford High Mg (secondary production)	3.89972	0	-1.61071	2.42112
5xxx -> 6xxx + LIBS 2050
	Name	Max est. impact	Slack	Shadow Price	Allowable increase
	Upper bound on Cu in Sheet 6xxx 6005C(secondary production)	25.9491	0	-2.62422	3.70639
	Upper bound on Zn in Sheet Ford High Cu (secondary production)	17.8423	0	-17.5275	1.01796
	Upper bound on Cu in Sheet Ford Low Cu (secondary production)	5.12235	0	-1.81636	2.82011
	Upper bound on Mg in Sheet 6xxx 6005C(secondary production)	4.01863	0	-0.0962896	41.7348
	Upper bound on Zn in Sheet 6xxx 6016(secondary production)	2.52752	0	-17.5275	0.144203
HRC + 5xxx -> 6xxx + LIBS 2050
	Name	Max est. impact	Slack	Shadow Price	Allowable increase
	Upper bound on Si in Sheet HRC 6xxx Alloy 2(secondary production)	5.17045	0	-0.14742	35.073
	Upper bound on Zn in Sheet Ford Low Cu (secondary production)	4.22873	0	-1.30771	3.23368
	Upper bound on Mg in Sheet HRC 6xxx Alloy 2(secondary production)	2.1108	0	-0.0513976	41.0681
	Upper bound on Zn in Sheet 6xxx 6005C(secondary production)	1.6947	0	-0.919346	1.3202
	Upper bound on Zn in Sheet 6xxx 6016(secondary production)	1.38783	0	-3.15746	0.298185
P0610 + HRC + No FCC + Separate manufacturing scrap + 5xxx -> 6xxx + LIBS 2050
	Name	Max est. impact	Slack	Shadow Price	Allowable increase
	Upper bound on Si in Sheet HRC 6xxx Alloy 2(secondary production)	4.00936	0	-0.146895	27.2941
	Upper bound on Zn in Sheet Ford Low Cu (secondary production)	3.22259	0	-1.30027	2.47839
	Upper bound on Zn in Sheet 6xxx 6005C(secondary production)	2.1135	0	-1.01345	1.19734
	Upper bound on Cu in Sheet 6xxx 6005C(secondary production)	1.78703	0	-0.146616	12.1885
	Upper bound on Mg in Sheet HRC 6xxx Alloy 2(secondary production)	0.851756	0	-0.0516666	16.4856
[Ford ABS case study] BAU 2025
	Name	Max est. impact	Slack	Shadow Price	Allowable increase
	Upper bound on Zn in Sheet Ford Low Cu (secondary production)	1.75894	0	-1.65685	1.06162
	Upper bound on Si in Sheet Ford Low Mg (secondary production)	1.75894	0	-0.277468	6.33927
	Upper bound on Zn in Sheet Ford High Cu (secondary production)	1.11857	0	-1.65685	0.67512
	Upper bound on Si in Sheet Ford High Mg (secondary production)	0.806756	0	-0.277468	2.90757
[Ford ABS case study] BAU 2050
	Name	Max est. impact	Slack	Shadow Price	Allowable increase
	Upper bound on Zn in Sheet Ford High Cu (secondary production)	23.4802	0	-1.64595	14.2654
	Upper bound on Zn in Sheet Ford Low Cu (secondary production)	7.05922	0	-1.64595	4.28883
	Upper bound on Si in Sheet Ford Low Mg (secondary production)	4.87783	0	-0.27587	17.6816
	Upper bound on Si in Sheet Ford High Mg (secondary production)	0.152107	0	-0.27587	0.551373
[Ford ABS case study] HRC 2050
	Name	Max est. impact	Slack	Shadow Price	Allowable increase
	Upper bound on Zn in Sheet Ford Low Cu (secondary production)	13.1816	0	-1.64595	8.00849
	Upper bound on Si in Sheet HRC 5xxx Alloy 2(secondary production)	4.08468	0	-0.27587	14.8066
	Upper bound on Si in Sheet HRC 6xxx Alloy 2(secondary production)	3.07921	0	-0.27587	11.1618
[Ford ABS case study] Shifting demand for 5xxx to 6xxx 2050
	Name	Max est. impact	Slack	Shadow Price	Allowable increase
	Upper bound on Zn in Sheet Ford High Cu (secondary production)	35.3957	0	-1.65834	21.344
	Upper bound on Zn in Sheet Ford Low Cu (secondary production)	20.7503	0	-1.65834	12.5127
[Ford ABS case study] Steel rivet reduction 2050
	Name	Max est. impact	Slack	Shadow Price	Allowable increase
	Upper bound on Zn in Sheet Ford High Cu (secondary production)	23.6023	0	-1.65768	14.2381
	Upper bound on Zn in Sheet Ford Low Cu (secondary production)	6.90822	0	-1.65768	4.1674
	Upper bound on Si in Sheet Ford Low Mg (secondary production)	4.0707	0	-0.277485	14.67
	Upper bound on Si in Sheet Ford High Mg (secondary production)	1.23585	0	-0.277485	4.45376
[Ford ABS case study] Processing Zorba into Twitch by size 2050
	Name	Max est. impact	Slack	Shadow Price	Allowable increase
	Upper bound on Zn in Sheet Ford High Cu (secondary production)	28.2264	0	-2.73102	10.3355
	Upper bound on Zn in Sheet Ford Low Cu (secondary production)	7.59601	0	-2.73102	2.78138
	Upper bound on Si in Sheet Ford Low Mg (secondary production)	6.76579	0	-0.278108	24.3279
	Upper bound on Si in Sheet Ford High Mg (secondary production)	0.153341	0	-0.278108	0.551373
[Ford ABS case study] LIBS 2050
	Name	Max est. impact	Slack	Shadow Price	Allowable increase
	Upper bound on Zn in Sheet Ford High Cu (secondary production)	76.1127	0	-12.5385	6.07032
	Upper bound on Mn in Sheet Ford Low Cu (secondary production)	22.0314	0	-4.19099	5.25684
	Upper bound on Si in Sheet Ford Low Mg (secondary production)	7.7567	0	-1.21169	6.40155
	Upper bound on Si in Sheet Ford High Mg (secondary production)	1.85419	0	-1.21169	1.53025
[Ford ABS case study] VD1 2050
	Name	Max est. impact	Slack	Shadow Price	Allowable increase
	Upper bound on Zn in Sheet Ford High Cu (secondary production)	4.38667	0	-1.46316	2.99808
	Upper bound on Cu in Sheet Ford High Mg (secondary production)	1.54695	0	-1.20628	1.28241
	Upper bound on Zn in Sheet Ford Low Mg (secondary production)	1.36321	0	-1.46316	0.931692
	Upper bound on Zn in Sheet Ford Low Cu (secondary production)	1.35632	0	-1.46316	0.926979
[Ford ABS case study] VD2 2050
	Name	Max est. impact	Slack	Shadow Price	Allowable increase
	Upper bound on Zn in Sheet Ford High Cu (secondary production)	40.9924	0	-19.7863	2.07175
	Upper bound on Mn in Sheet Ford Low Cu (secondary production)	37.7349	0	-3.12106	12.0904
	Upper bound on Zn in Sheet Ford Low Mg (secondary production)	15.102	0	-0.201799	74.8366
	Upper bound on Si in Sheet Ford High Mg (secondary production)	0.914939	0	-1.55441	0.588608
